# Supplementary material for: Photoinduced sulfonylation cyclization to medium-sized benzo[b]azocine and mechanistic insight
Source: Royal Society of Chemistry journal article supplement (doi:10.1039/d3qo00387f), 2023-01-01

# Supporting Information

## **Photoinduced Sulfonylation Cyclization to Medium-Sized Benzo[*b*]azocine and Mechanistic Insight**

### Table of Contents

|                                                                       |    |
|-----------------------------------------------------------------------|----|
| <b>1. General Conditions.</b> .....                                   | 2  |
| <b>2. Typical Experimental Procedures.</b> .....                      | 2  |
| <b>3. Control Experiments.</b> .....                                  | 6  |
| <b>5. Calculation of apparent quantum efficiency (A. Q. E):</b> ..... | 9  |
| <b>6. Products Characterization</b> .....                             | 10 |
| <b>7. DFT Calculations</b> .....                                      | 32 |
| <b>8. NMR Spectra of Products</b> .....                               | 86 |

## 1. General Conditions.

All reagents were purchased from commercial sources and used without further purification.  $^1\text{H}$  NMR,  $^{13}\text{C}$  NMR spectra were recorded on a Bruker Ascend™ 400 or Bruker Ascend™ 500 spectrometer in deuterated solvents containing TMS as an internal reference standard. All high-resolution mass spectra (HRMS) were measured on a mass spectrometer by using electrospray ionization orthogonal acceleration time-of-flight (ESI-OA-TOF), and the purity of all samples used for HRMS (>95%) was confirmed by  $^1\text{H}$  NMR and  $^{13}\text{C}$  NMR spectroscopic analysis. Melting points were measured on a melting point apparatus equipped with a thermometer and were uncorrected. All the reactions were monitored by thin-layer chromatography (TLC) using GF254 silica gel-coated TLC plates. Purification by flash column chromatography was performed over  $\text{SiO}_2$  (silica gel 200–300 mesh).

## 2. Typical Experimental Procedures.

### Preparation of material 1.

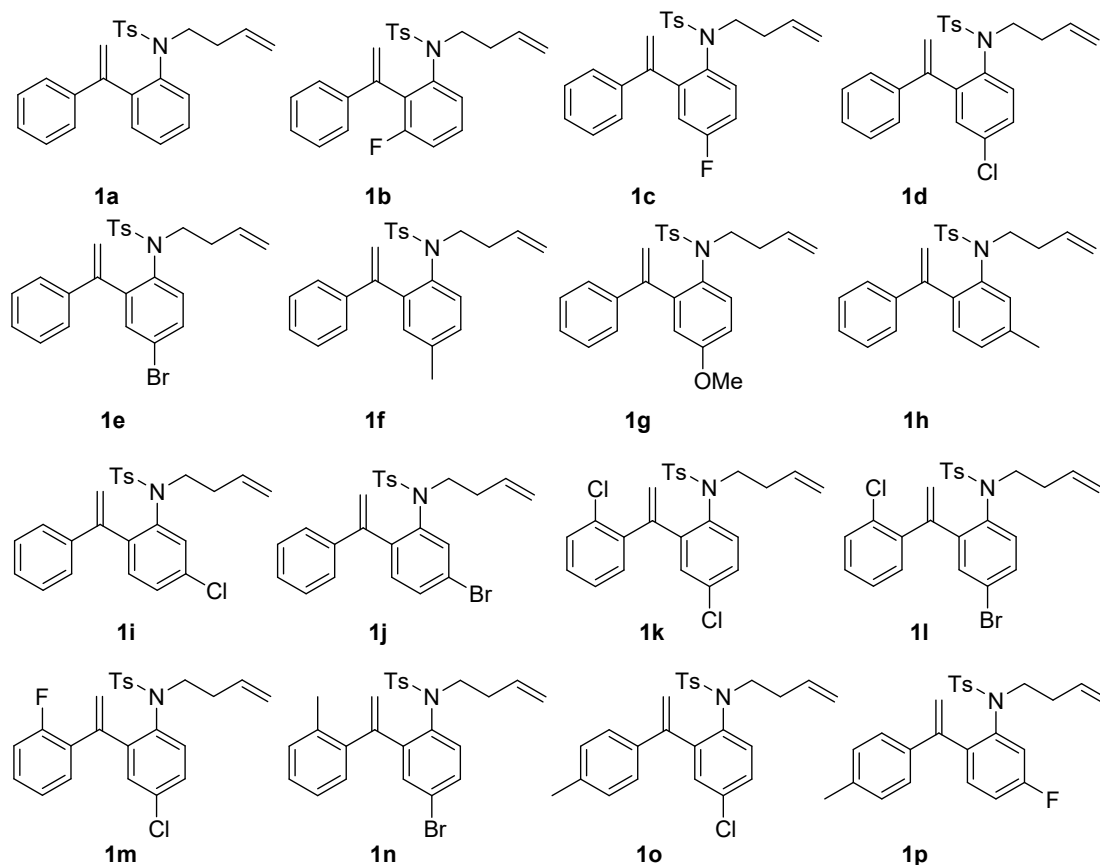

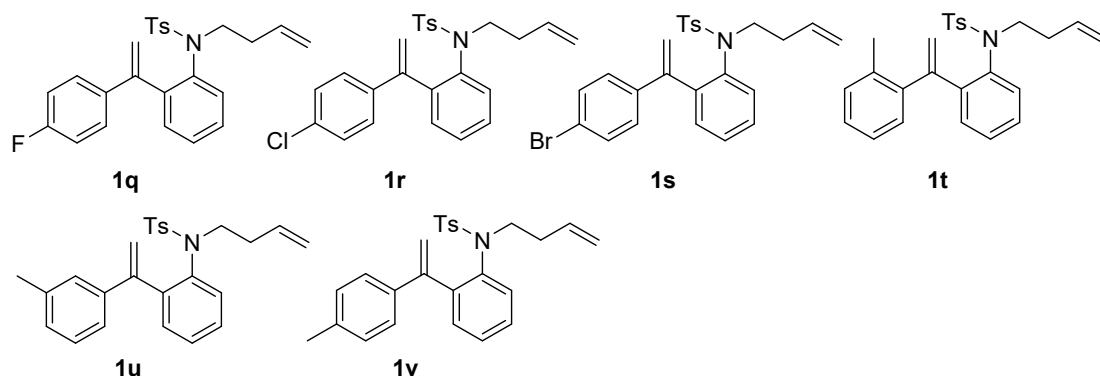

## 2.1 The general procedure for the synthesis of 1.

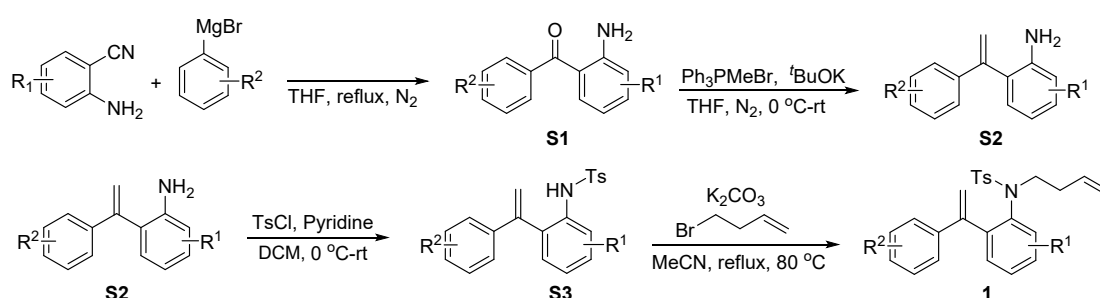

**1a, 1b, 1c, 1d, 1i, 1j, 1k, 1l, 1m, 1q, 1r, 1s** were prepared from (2-aminophenyl)(phenyl)methanone **S1**.

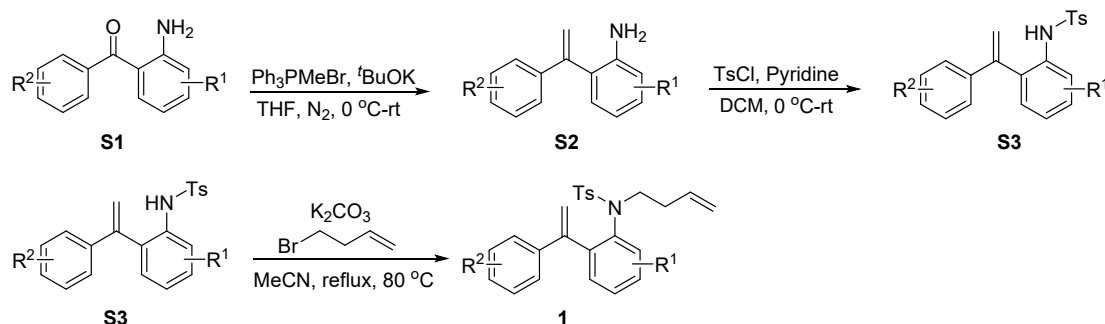

**1e, 1f, 1g, 1h, 1n, 1o, 1p, 1t, 1u, 1v** were prepared from 2-aminobenzonitrile.

### General Procedure for the synthesis of S1.

To a round-bottomed flask charged with 2-aminobenzonitrile (10 mmol, 1.0 equiv.) in dry THF (20 mL), arylmagnesium bromide (30 mmol, 3.0 equiv., 2.8 M in THF) was added dropwise *via* syringe at 0 °C in a nitrogen atmosphere. The reaction mixture was heated in oil bath at 65 °C for 4 h. Upon the reaction completed, the suspension was cooled to 0 °C, the reaction mixture was quenched by 3 M HCl, extracted with EtOAc (3×40 mL). The separated organic layer was washed with brine, dried over anhydrous Na<sub>2</sub>SO<sub>4</sub>, filtered, and concentrated in vacuo. The residue was purified by silica gel column chromatography (eluent: petroleum ether/EtOAc = 100:1) to afford **S1**.

### General Procedure for the synthesis of S2.

To a round-bottom flask, tetrahydrofuran (20 mL) solution containing  $\text{Ph}_3\text{PMeBr}$  (10.0 mmol, 1.5 equiv.) and potassium *tert*-butanol (7.5 mmol, 1.5 equiv.) were added in batches at 0 °C in a air atmosphere. Half an hour later, **S1** (5.0 mmol, 1.0 equiv.) was added dropwise at 0 °C. The reaction mixture was warmed to room temperature and stirred for 4 h. Upon the reaction completed, the desired product **S2** was purified on silica gel column by flash column chromatography (eluent: petroleum ether/EtOAc = 100:1).

### General Procedure for the synthesis of S3.

To a round-bottomed flask charged with dichloromethane (15 mL) solution dissolved with  $\text{TsCl}$  (2.4 mmol, 1.2 equiv.), **S2** (2.0 mmol, 1.0 equiv.) was added, and then pyridine (3.0 mmol, 1.5 equiv.) was dropped at 0 °C. The reaction mixture was warmed to room temperature and stirred for 12 h. Upon the reaction completed, the reaction mixture was extracted with EtOAc (3×15 mL). The separated organic layer was washed with brine, dried over anhydrous  $\text{Na}_2\text{SO}_4$ , filtered, and concentrated in vacuo. The residue was purified by silica gel column chromatography (eluent: petroleum ether/EtOAc = 100:1) to afford **S3**.

### General Procedure for the synthesis of 1.

To a round bottom flask containing potassium carbonate (2.4 mmol, 2.0 equiv.), 4-Bromo-1-butene (2.4 mmol, 2.0 equiv.), **S3** (1.2 mmol, 1.0 equiv) and acetonitrile (10 mL) were added. The reaction mixture was stirred in oil bath at 80 °C for 4 h. Upon the reaction completed, the reaction mixture was concentrated in vacuo. The residue was purified by silica gel column chromatography (eluent: petroleum ether/EtOAc = 100:1) to afford **1**.

### 2.2 The general procedure for the synthesis of 3.

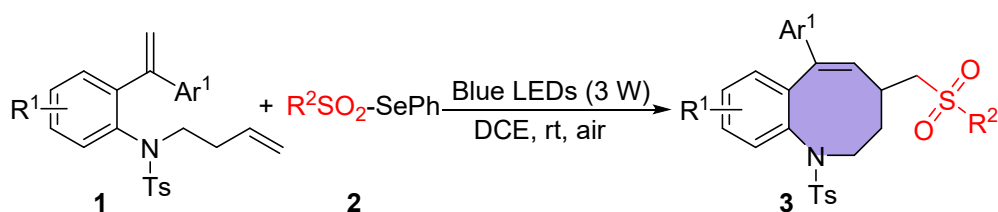

Dienes **1** (0.30 mmol), selenosulfonates **2** (0.39 mmol) and DCE (3 mL) were placed in a 10 mL glass tube. The resulting mixture was allowed to stir at room temperature under 3 W blue LEDs irradiation for 12 hours under air and then monitored by TLC. After the completion of the reaction, the mixture was quenched by  $\text{NaHCO}_3$  (sat. aq. 15 mL) and extracted with DCM (5 mL×3). Then the organic solvent was concentrated in vacuo. The residue was purified by flash column chromatography with ethyl acetate and petroleum ether as eluent (6:1) to give 8-exo cyclization products **3**.



### 2.3 The gram-scale synthesis of compound 3aa.

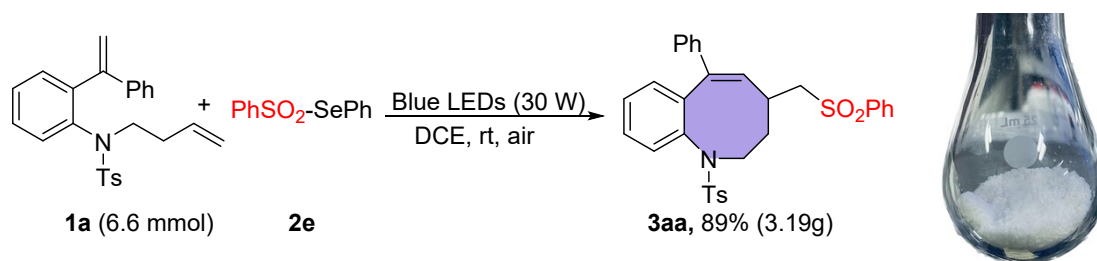

**1a** (6.6 mmol, 2.66 g), **2e** (8.58 mmol, 2.55 g) and DCE (10 mL) were placed in a 15 mL glass tube. The resulting mixture was allowed to stir at room temperature under 30 W blue LEDs irradiation for 14 hours under air and then monitored by TLC. After the completion of the reaction, the mixture was quenched by NaHCO<sub>3</sub> (sat. aq. 150 mL) and extracted with DCM (50 mL×3). Then the organic solvent was concentrated in vacuo. The residue was purified by flash column chromatography with ethyl acetate and petroleum ether as eluent to give **3aa** (3.19 g, 89%).

### 2.4 General procedure for the synthesis of 4.

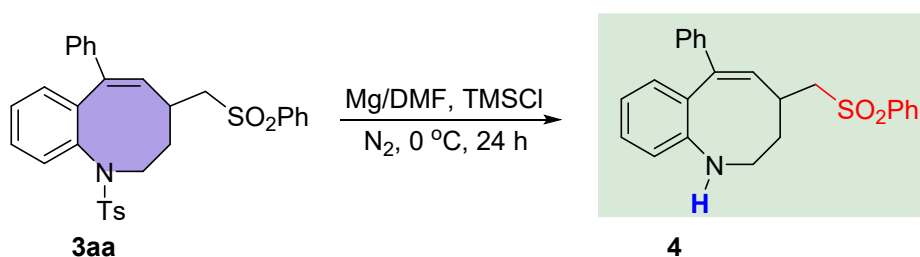

To a 10 mL dry Schlenk tube equipped with a magnetic stir bar, **3aa** (0.3 mmol, 162.9 mg), TMSCl (1.5mmol, 162.9mg), Mg (0.9 mmol, 27.3 mg) and DMF (dry, 3 mL) were added. The tube was sealed and the reaction mixture was stirred at 0°C for 24 h under N<sub>2</sub>. Upon the reaction completed, H<sub>2</sub>O was added to mixture and extracted with ethyl acetate. The combined organic layer was dried (anhydrous Na<sub>2</sub>SO<sub>4</sub>), filtered, and evaporated followed by a silica gel column chromatography (petroleum ether/ethyl acetate = 10: 3) to afford desired product **4** (95.8 mg, 82%).

### 2.5 General procedure for the synthesis of 5.

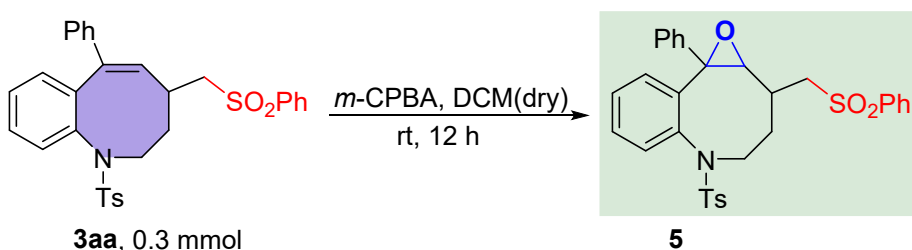

To a 10 mL dry thick walled tube equipped with a magnetic stir bar, **3aa** (0.3 mmol, 162.9 mg) and DCM (dry, 1.5 mL) were added. Then, the *m*-CPBA (0.45 mmol, 77.6 mg) was dissolved in 1.5 mL of DCM (dry) was added. The tube was sealed and the reaction mixture was stirred at rt

for 12 h under N<sub>2</sub>. Upon the reaction completed, the mixture was concentrated under reduced pressure. The resulting crude residue was purified via flash column chromatography (petroleum ether/ethyl acetate = 10:3) on silica gel to afford the desired product **5** (119.2 mg, 71%).

### 3. Control Experiments.

#### 3.1 Control experiment in the presence of TEMPO.

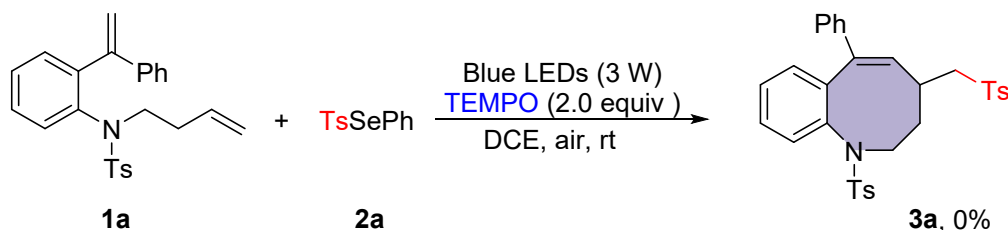

**1a** (0.20 mmol, 80.63 mg), TsSePh **2a** (0.26 mmol, 81.11 mg), TEMPO (0.40 mmol, 62.50 mg) and DCE (3mL) were placed in a 10 mL glass tube. The resulting mixture was allowed to stir at room temperature under 3 W blue LEDs irradiation for 12 hours and then monitored by TLC. No desired product **3a** was detected.

#### 3.2 Control experiment in the presence of BHT.

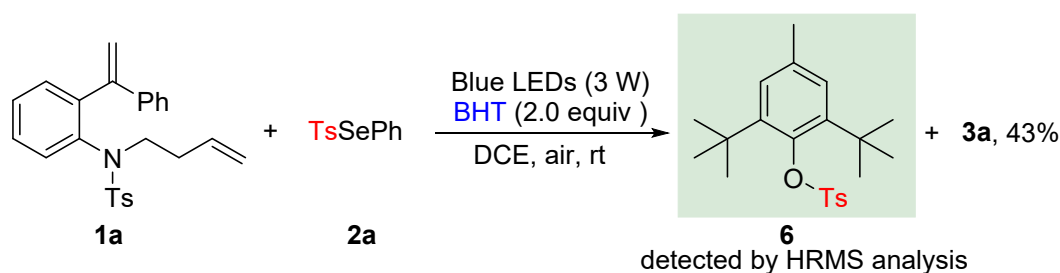

**1a** (0.20 mmol, 80.63 mg), TsSePh **2a** (0.26 mmol, 81.11 mg), BHT (0.40 mmol, 62.50 mg) and DCE (3mL) were placed in a 10 mL glass tube. The resulting mixture was allowed to stir at room temperature under 3 W blue LEDs irradiation for 8 hours and then monitored by TLC. We successfully detected the adduct **6** by HRMS analysis. The residue was purified by column chromatography to give the corresponding product **3a** in 43% yield.

**HRMS** (ESI) calcd for adduct **6** C<sub>22</sub>H<sub>30</sub>NaO<sub>3</sub>S [M+Na]<sup>+</sup>: 397.1808, found: 397.1808.

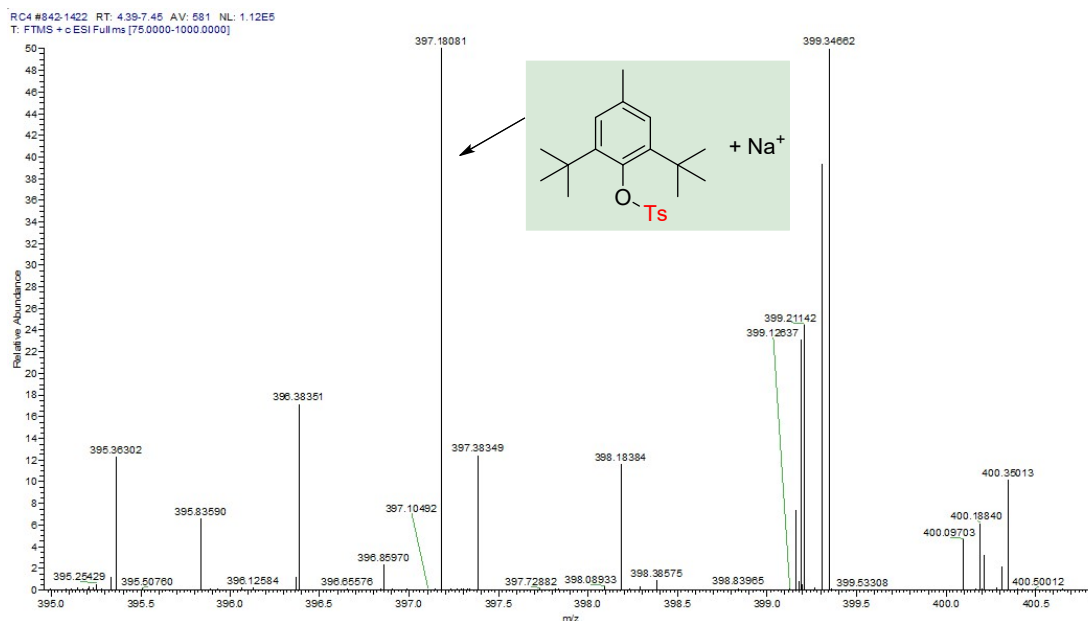

### 3.3 Control experiment in the presence of 1,1-Diphenylethylene.

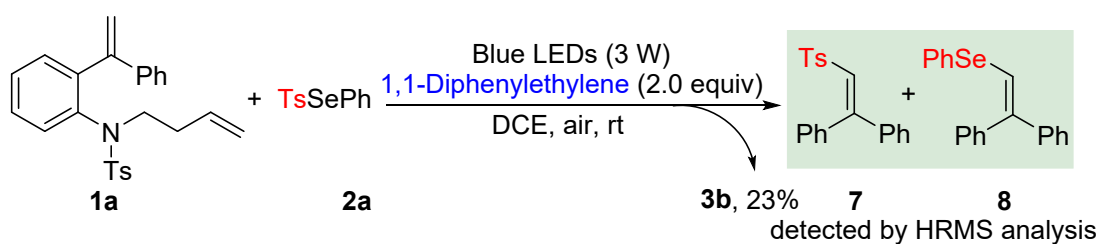

**1a** (0.20 mmol, 80.63 mg), **TsSePh 2a** (0.26 mmol, 81.11 mg), 1,1-diphenylethylene (0.40 mmol, 108.2 mg) and DCE (3 mL) were placed in a 10 mL glass tube. The resulting mixture was allowed to stir at room temperature under 3 W blue LEDs irradiation for 12 hours and then monitored by TLC. We successfully detected the desired **7** and **8** by HRMS analysis. The residue was purified by column chromatography to give the corresponding product **3a** in 23% yield.

**HRMS** (ESI) calcd for  $C_{21}H_{18}NaO_2S$   $[M+Na]^+$ : 357.0920, found: 357.0912.

**HRMS** (ESI) calcd for  $C_{20}H_{16}NaSe$   $[M+Na]^+$ : 359.0309, found: 359.0300.

RC7 #843 RT: 4.62 AV: 1 SB: 84 4.19-4.42 , 5.04-5.25 NL: 1.98E8  
T: FTMS + c ESI Full ms [75.0000-1000.0000]

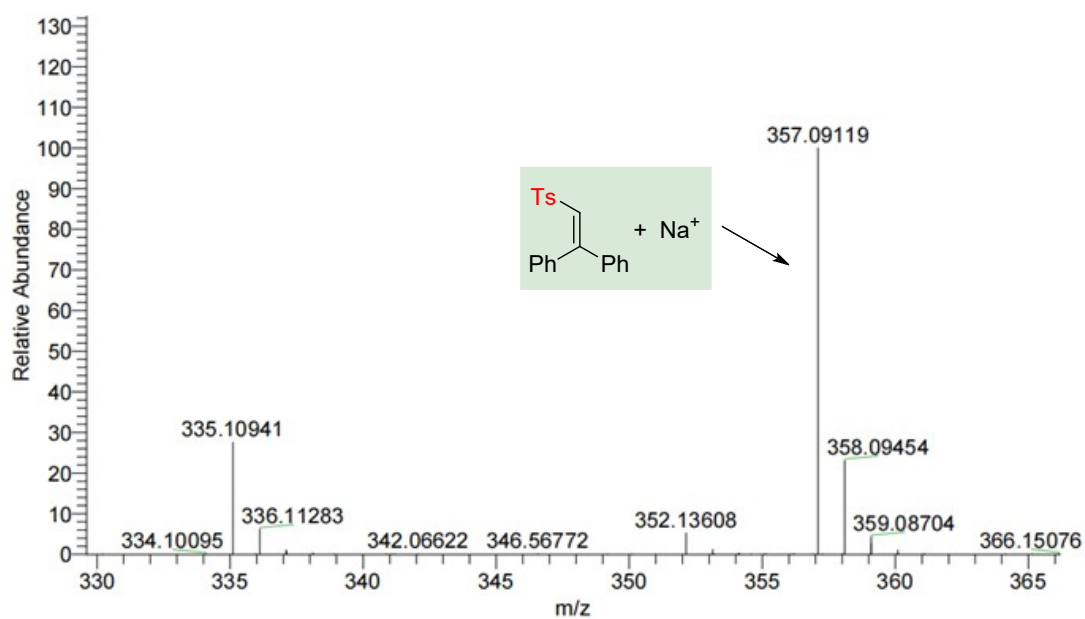

RC7 #575 RT: 3.16 AV: 1 NL: 3.27E4  
T: FTMS + c ESI Full ms [75.0000-1000.0000]

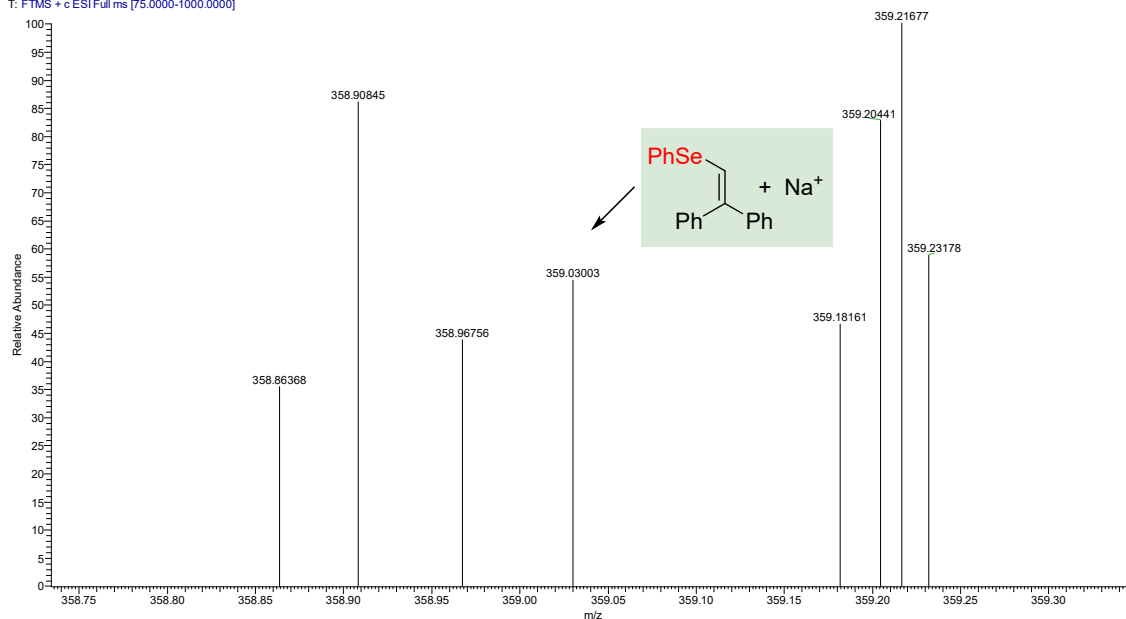

#### 4. Effect of Visible Light Irradiation Experimental procedure.

In 10 mL glass tube equipped with a magnetic stir bar, **1a** (0.20 mmol), **2a** (0.26 mmol) and benzotrifluoride (0.20 mmol, as the internal standard) were added in DCE (2.0 mL). Then the mixture was stirred and irradiated by two 3 W blue LEDs at room temperature. After 1.0 h, the blue LEDs were turned off, and the glass tube was taken from the irradiation device and 0.2 ml of the mixture was taken out for analysis. The remaining mixture was stirred in the absence of light for an additional 1.0 h. Then, the glass tube was taken from the irradiation device and 0.2 mL of the mixture was taken out for analysis, and the blue LEDs were turned back on to irradiate the residual mixture. After an additional 1.0 h of irradiation, the blue LEDs were turned off, and the

glass tube was taken from the irradiation device and 0.2 ml of the mixture was taken out for analysis. The remaining mixture was stirred in the absence of light for an additional 1.0 h. Then, glass tube was removed for analysis, and the blue LEDs were turned back on to irradiate the residual mixture. After 1.0 h, the blue LEDs were turned off, and the glass tube was taken from the irradiation device and 0.2 ml of the mixture was taken out for analysis. The remaining mixture was stirred in the absence of light for an additional 1.0 h, and then it was analyzed. The yield was determined by  $^{19}\text{F}$  NMR spectroscopy using benzotrifluoride as the internal standard.

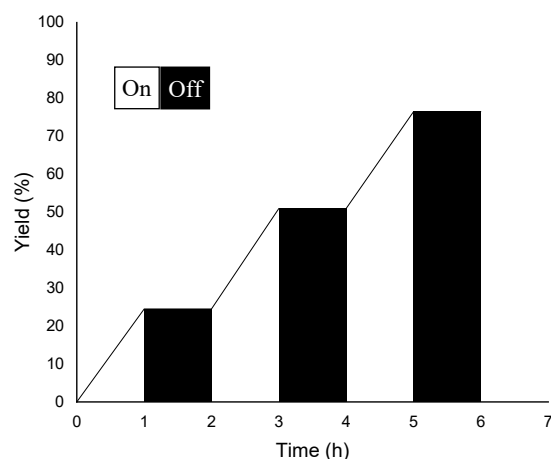

**Fig 2.** Light on/ off experiment

## 5. Calculation of apparent quantum efficiency (A. Q. E)

### Experimental procedure:

In 25 mL glass tube equipped with a magnetic stir bar, **1a** (0.10 mmol), **2d** (0.26 mmol) and benzotrifluoride (0.20 mmol, as the internal standard) were added in DCE (1.0 mL). Then the mixture was stirred and irradiated by two 3 W blue LEDs at room temperature. After 1.0 h, the blue LEDs were turned off, and the glass tube was taken from the irradiation device and 0.2 ml of the mixture was taken out for analysis. The photon flux of the light source was determined by an optical power meter to be 162.03 mW (average of three experiments).

$$E_{\text{photon}} = \frac{hc}{\lambda_{\text{inc}} (455 \text{ nm})} = \frac{6.63 \times 10^{-34} \text{ J} \cdot \text{s} \times 3 \times 10^8 \text{ m} \cdot \text{s}^{-1}}{455 \times 10^{-9} \text{ m}} = 4.37 \times 10^{-19} \text{ J}$$

$$E_{\text{total}} = P \cdot S \cdot t = 162.03 \times 10^{-3} \text{ W} \cdot \text{cm}^{-2} \times 2.25 \text{ cm}^2 \times 1.0 \times 3600 \text{ s} = 1.312 \times 10^3 \text{ J}$$

$$\text{Number of incident photons} = \frac{E_{\text{total}}}{E_{\text{photon}}} = 4.985 \text{ mmol}$$

$$\text{A.Q.E}(\%) = \frac{\text{Number of product}}{\text{Number of incident photons}} = \frac{0.0322 \text{ mmol}}{4.985 \text{ mmol}} = 0.65\% < 1$$

Where  $h$  ( $\text{J} \cdot \text{s}$ ) is Planck's constant,  $c$  ( $\text{m} \cdot \text{s}^{-1}$ ) is the speed of light and  $\lambda_{\text{inc}}$  (m) is the wavelength of the incident light.  $P$  ( $\text{W} \cdot \text{cm}^{-2}$ ) is the power density of the incident light,  $S$  ( $\text{cm}^2$ ) is the irradiation area, and  $t$  (s) is the photoreaction time. The A.Q.E(%) result indicated that the reaction not involved radical chain pathway.

## 6. Products Characterization

### (*Z*)-6-phenyl-1-tosyl-4-(tosylmethyl)-1,2,3,4-tetrahydrobenzo[*b*]azocine (**3a**)

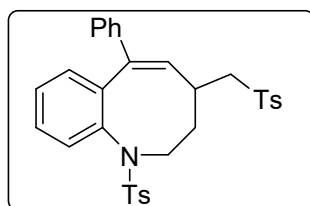

**1a** (0.30 mmol, 121.06 mg) was reacted with TsSePh **2a** (0.39 mmol, 121.67 mg) according to General Procedure. The crude product was purified by column chromatography (petroleum ether: ethyl acetate = 10:3) to afford the compound **3a** as a yellow solid (m. p. 93-94°C) in 82% yield (137.20 mg).

**R<sub>f</sub>**(petroleum ether/ethyl acetate = 10:3): 0.10; **<sup>1</sup>H NMR** (500 MHz, CDCl<sub>3</sub>)  $\delta$  7.61 (t, *J* = 8.2 Hz, 4H), 7.29-7.25 (m, 2H), 7.23-7.17 (m, 9H), 7.11 (dd, *J* = 7.4, 1.6 Hz, 1H), 6.92 (d, *J* = 7.6 Hz, 1H), 5.85 (d, *J* = 8.5 Hz, 1H), 4.18 (dd, *J* = 14.7, 3.2 Hz, 1H), 3.36 (dd, *J* = 14.2, 8.9 Hz, 1H), 3.13 (dd, *J* = 14.3, 4.7 Hz, 1H), 2.96-2.87 (m, 1H), 2.37 (s, 3H), 2.33 (s, 3H), 2.29-2.25 (m, 1H), 1.84-1.77 (m, 1H), 1.59 (d, *J* = 13.6 Hz, 1H); **<sup>13</sup>C NMR** (126 MHz, CDCl<sub>3</sub>)  $\delta$  144.76, 143.38, 141.56, 141.47, 140.19, 138.60, 137.55, 136.29, 130.86, 130.53, 129.93, 129.55, 129.25, 128.63, 128.59, 128.37, 128.10, 127.92, 127.66, 127.43, 62.93, 50.19, 34.36, 33.31, 21.61, 21.56; **HRMS** (ESI) calcd for C<sub>32</sub>H<sub>31</sub>NNaO<sub>4</sub>S<sub>2</sub>[M+Na]<sup>+</sup>: 580.1587, found: 580.1579.

### (*Z*)-7-fluoro-6-phenyl-1-tosyl-4-(tosylmethyl)-1,2,3,4-tetrahydrobenzo[*b*]azocine (**3b**)

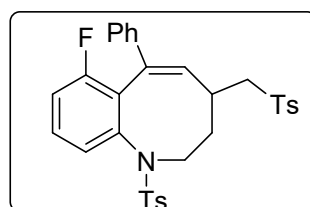

**1b** (0.30 mmol, 126.3 mg) was reacted with TsSePh **2a** (0.39 mmol, 121.67 mg) according to General Procedure. The crude product was purified by column chromatography (petroleum ether: ethyl acetate = 5:2) to afford the compound **3b** as a yellow solid (m. p. 102-103°C) in 74% yield (127.81 mg).

**R<sub>f</sub>**(petroleum ether/ethyl acetate = 5:2): 0.37; **<sup>1</sup>H NMR** (500 MHz, CDCl<sub>3</sub>)  $\delta$  7.67 (d, *J* = 8.1 Hz, 2H), 7.59 (d, *J* = 8.1 Hz, 2H), 7.33-7.14 (m, 8H), 7.13-7.05 (m, 3H), 6.84 (d, *J* = 8.0 Hz, 1H), 5.86 (d, *J* = 8.7 Hz, 1H), 4.16 (dd, *J* = 14.9, 3.4 Hz, 1H), 3.39 (dd, *J* = 14.3, 9.3 Hz, 1H), 3.13 (dd, *J* = 14.4, 4.3 Hz, 1H), 2.90 (dd, *J* = 19.9, 7.6 Hz, 1H), 2.37 (s, 3H), 2.36 (s, 3H), 2.29-2.22 (m, 1H),

1.72 (s, 1H), 1.56 (d,  $J = 13.7$  Hz, 1H);  $^{13}\text{C}$  NMR (126 MHz,  $\text{CDCl}_3$ )  $\delta$  161.48, 159.48, 144.83, 143.67, 142.26 (d,  $J = 5.9$  Hz), 140.05, 137.16, 135.99, 133.90, 132.50, 130.12 (d,  $J = 9.7$  Hz), 130.02, 129.60, 129.16 (d,  $J = 15.0$  Hz), 128.15 (d,  $J = 38.0$  Hz), 127.75, 127.53, 127.04, 124.65 (d,  $J = 3.0$  Hz), 116.40, 62.75, 50.35, 34.70, 33.23, 21.63, 21.55;  $^{19}\text{F}$  NMR (471 MHz,  $\text{CDCl}_3$ )  $\delta$  -105.38; HRMS (ESI) calcd for  $\text{C}_{32}\text{H}_{30}\text{FNNaO}_4\text{S}_2[\text{M}+\text{Na}]^+$ : 598.1492, found: 598.1483.

**(Z)-8-fluoro-6-phenyl-1-tosyl-4-(tosylmethyl)-1,2,3,4-tetrahydrobenzo[b]azocine (3c)**

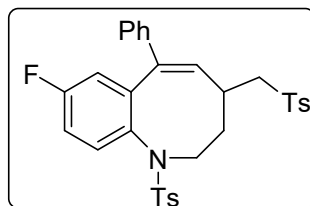

**1c** (0.30 mmol, 126.3 mg) was reacted with TsSePh **2a** (0.39 mmol, 121.67 mg) according to General Procedure. The crude product was purified by column chromatography (petroleum ether: ethyl acetate = 5:2) to afford the compound **3c** as a yellow solid (m. p. 151-152°C) in 73% yield (125.8 mg).

$R_f$  (petroleum ether/ethyl acetate = 5:2): 0.17;  $^1\text{H}$  NMR (500 MHz,  $\text{CDCl}_3$ )  $\delta$  7.61 (dd,  $J = 19.2$ , 8.1 Hz, 4H), 7.28-7.19 (m, 9H), 6.98-6.87 (m, 2H), 6.78 (dd,  $J = 9.0$ , 2.8 Hz, 1H), 5.89 (d,  $J = 8.6$  Hz, 1H), 4.20 (dd,  $J = 14.7$ , 3.3 Hz, 1H), 3.36 (dd,  $J = 14.2$ , 8.8 Hz, 1H), 3.15 (dd,  $J = 14.2$ , 4.9 Hz, 1H), 2.93-2.85 (m, 1H), 2.39 (s, 3H), 2.37 (s, 3H), 2.25-2.18 (m, 1H), 1.85-1.76 (m, 1H), 1.64 (d,  $J = 5.1$  Hz, 1H);  $^{13}\text{C}$  NMR (126 MHz,  $\text{CDCl}_3$ )  $\delta$  162.61, 160.62, 144.93, 143.78 (d,  $J = 8.6$  Hz), 143.55, 140.70, 137.96, 137.27, 136.23 (d,  $J = 3.0$  Hz), 136.10, 130.96, 130.35 (d,  $J = 9.0$  Hz), 129.91, 129.61, 128.56, 128.08, 127.72, 127.62, 117.33 (d,  $J = 22.3$  Hz), 116.28 (d,  $J = 22.7$  Hz), 62.70, 50.19, 34.34, 33.06, 21.55;  $^{19}\text{F}$  NMR (471 MHz,  $\text{CDCl}_3$ )  $\delta$  -111.71; HRMS (ESI) calcd for  $\text{C}_{32}\text{H}_{30}\text{FNaO}_4\text{S}_2[\text{M}+\text{Na}]^+$ : 598.1492, found: 598.1485.

**(Z)-8-chloro-6-phenyl-1-tosyl-4-(tosylmethyl)-1,2,3,4-tetrahydrobenzo[b]azocine (3d)**

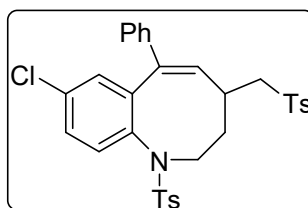

**1d** (0.30 mmol, 126.9 mg) was reacted with TsSePh **2a** (0.39 mmol, 121.67 mg) according to General Procedure. The crude product was purified by column chromatography (petroleum ether:

ethyl acetate = 10:3) to afford the compound **3d** as a yellow solid (m. p. 126-127°C) in 75% yield (133.24 mg).

**R<sub>f</sub>** (petroleum ether/ethyl acetate = 5:2): 0.17; **<sup>1</sup>H NMR** (500 MHz, CDCl<sub>3</sub>) δ 7.61 (dd, *J* = 14.2, 8.2 Hz, 4H), 7.29-7.17 (m, 10H), 7.09 (d, *J* = 2.4 Hz, 1H), 6.85 (d, *J* = 8.5 Hz, 1H), 5.94 (d, *J* = 8.6 Hz, 1H), 4.19 (dd, *J* = 14.7, 3.3 Hz, 1H), 3.36 (dd, *J* = 14.2, 9.0 Hz, 1H), 3.15 (dd, *J* = 14.2, 4.8 Hz, 1H), 2.91-2.81 (m, 1H), 2.39 (s, 3H), 2.38 (s, 3H), 2.14-2.08 (m, 1H), 1.83-1.75 (m, 1H), 1.62 (d, *J* = 15.7 Hz, 1H); **<sup>13</sup>C NMR** (126 MHz, CDCl<sub>3</sub>) δ 144.96, 143.62, 143.25, 140.73, 138.74, 137.70, 137.20, 135.82, 134.10, 131.22, 130.74, 129.98, 129.92, 129.63, 129.36, 128.61, 128.16, 128.12, 127.77, 127.63, 62.64, 50.11, 34.39, 32.98, 21.61, 21.56; **HRMS** (ESI) calcd for C<sub>32</sub>H<sub>30</sub>ClNaO<sub>4</sub>S<sub>2</sub>[M+Na]<sup>+</sup>: 614.1197, found: 614.1189.

**(Z)-8-bromo-6-phenyl-1-tosyl-4-(tosylmethyl)-1,2,3,4-tetrahydrobenzo[*b*]azocine (3e)**

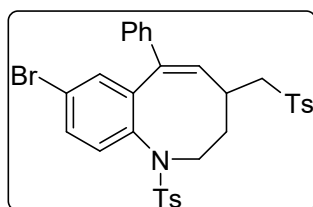

**1e** (0.30 mmol, 144.3 mg) was reacted with TsSePh **2a** (0.39 mmol, 121.67 mg) according to General Procedure. The crude product was purified by column chromatography (petroleum ether: ethyl acetate = 5:2) to afford the compound **3e** as a yellow solid (m. p. 122-123°C) in 80% yield (172.8 mg).

**R<sub>f</sub>** (petroleum ether/ethyl acetate = 5:2): 0.38; **<sup>1</sup>H NMR** (500 MHz, CDCl<sub>3</sub>) δ 7.61 (dd, *J* = 14.5, 8.2 Hz, 4H), 7.37 (dd, *J* = 8.5, 2.3 Hz, 1H), 7.26 (dd, *J* = 11.4, 6.4 Hz, 8H), 7.20 (d, *J* = 8.0 Hz, 2H), 6.79 (d, *J* = 8.5 Hz, 1H), 5.95 (d, *J* = 8.6 Hz, 1H), 4.19 (dd, *J* = 14.7, 3.4 Hz, 1H), 3.36 (dd, *J* = 14.2, 9.0 Hz, 1H), 3.14 (dd, *J* = 14.2, 4.8 Hz, 1H), 2.90-2.81 (m, 1H), 2.40 (s, 6H), 2.14-2.05 (m, 1H), 1.84-1.74 (m, 1H), 1.61 (s, 1H); **<sup>13</sup>C NMR** (126 MHz, CDCl<sub>3</sub>) δ 144.99, 143.63, 143.56, 140.74, 139.26, 137.61, 137.19, 135.76, 133.70, 132.34, 131.30, 130.27, 129.94, 129.62, 128.61, 128.18, 128.13, 127.79, 127.64, 122.23, 62.65, 50.06, 34.40, 32.98, 21.66, 21.56; **HRMS** (ESI) calcd for C<sub>32</sub>H<sub>30</sub>BrNNaO<sub>4</sub>S<sub>2</sub>[M+Na]<sup>+</sup>: 658.0692, found: 658.0684.

**(Z)-8-methyl-6-phenyl-1-tosyl-4-(tosylmethyl)-1,2,3,4-tetrahydrobenzo[*b*]azocine (3f)**



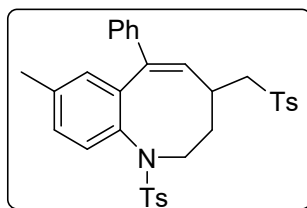

**1f** (0.30 mmol, 125.1 mg) was reacted with TsSePh **2a** (0.39 mmol, 121.67 mg) according to General Procedure. The crude product was purified by column chromatography (petroleum ether: ethyl acetate = 5:2) to afford the compound **3f** as a yellow solid (m. p. 84-85°C) in 75% yield (127.7 mg).

**R<sub>f</sub>** (petroleum ether/ethyl acetate = 5:2): 0.38; **<sup>1</sup>H NMR** (500 MHz, CDCl<sub>3</sub>) δ 7.62 (dd, *J* = 15.3, 8.1 Hz, 4H), 7.24 (s, 4H), 7.19 (dd, *J* = 10.8, 8.3 Hz, 5H), 7.05 (dd, *J* = 8.1, 1.2 Hz, 1H), 6.91 (s, 1H), 6.79 (d, *J* = 8.1 Hz, 1H), 5.85 (d, *J* = 8.5 Hz, 1H), 4.17 (dd, *J* = 14.6, 3.3 Hz, 1H), 3.35 (dd, *J* = 14.2, 8.9 Hz, 1H), 3.13 (dd, *J* = 14.2, 4.8 Hz, 1H), 2.92-2.85 (m, 1H), 2.37 (s, 3H), 2.35 (s, 3H), 2.30 (s, 3H), 2.27-2.22 (m, 1H), 1.81-1.76 (m, 1H), 1.58 (d, *J* = 13.5 Hz, 1H); **<sup>13</sup>C NMR** (126 MHz, CDCl<sub>3</sub>) δ 144.70, 143.29, 141.62, 141.16, 138.66, 138.26, 137.69, 137.64, 136.30, 131.14, 130.46, 130.08, 129.86, 129.51, 128.67, 128.22, 128.17, 127.93, 127.65, 127.37, 62.88, 50.24, 34.30, 33.40, 21.63, 21.55, 21.23; **HRMS** (ESI) calcd for C<sub>33</sub>H<sub>33</sub>NNaO<sub>4</sub>S<sub>2</sub>[M+Na]<sup>+</sup>: 594.1743, found: 594.1734.

**(Z)-8-methoxy-6-phenyl-1-tosyl-4-(tosylmethyl)-1,2,3,4-tetrahydrobenzo[*b*]azocine (3g)**

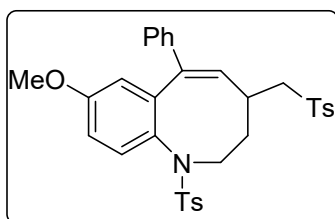

**1g** (0.30 mmol, 130.0 mg) was reacted with TsSePh **2a** (0.39 mmol, 121.67 mg) according to General Procedure. The crude product was purified by column chromatography (petroleum ether: ethyl acetate = 5:2) to afford the compound **3g** as a yellow solid (m. p. 84-85°C) in 72% yield (126.1 mg).

**R<sub>f</sub>** (petroleum ether/ethyl acetate = 5:2): 0.37; **<sup>1</sup>H NMR** (500 MHz, CDCl<sub>3</sub>) δ 7.62 (dd, *J* = 20.6, 8.0 Hz, 4H), 7.25-7.17 (m, 9H), 6.83-6.76 (m, 2H), 6.58 (d, *J* = 2.4 Hz, 1H), 5.83 (d, *J* = 8.6 Hz, 1H), 4.19 (dd, *J* = 14.5, 3.2 Hz, 1H), 3.73 (s, 3H), 3.35 (dd, *J* = 14.1, 8.7 Hz, 1H), 3.14 (dd, *J* = 14.2, 4.8 Hz, 1H), 2.89 (t, *J* = 12.2 Hz, 1H), 2.38 (s, 3H), 2.35 (s, 3H), 2.30 (dd, *J* = 9.1, 4.8 Hz,

1H), 1.79 (td,  $J = 13.9, 4.5$  Hz, 1H), 1.61 (d,  $J = 13.5$  Hz, 1H);  $^{13}\text{C}$  NMR (126 MHz,  $\text{CDCl}_3$ )  $\delta$  158.91, 144.77, 143.25, 142.66, 141.18, 138.61, 137.61, 136.27, 133.11, 130.43, 129.88, 129.53, 129.49, 128.57, 128.15, 127.91, 127.62, 127.42, 115.60, 114.64, 62.91, 55.51, 50.35, 34.28, 33.42, 21.57, 21.54; HRMS (ESI) calcd for  $\text{C}_{33}\text{H}_{33}\text{NNaO}_5\text{S}_2[\text{M}+\text{Na}]^+$ : 610.1692, found: 610.1683.

**(Z)-9-methyl-6-phenyl-1-tosyl-4-(tosylmethyl)-1,2,3,4-tetrahydrobenzo[b]azocine (3h)**

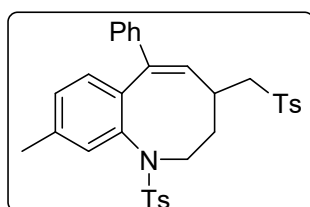

**1h** (0.30 mmol, 125.1 mg) was reacted with TsSePh **2a** (0.39 mmol, 121.67 mg) according to General Procedure. The crude product was purified by column chromatography (petroleum ether: ethyl acetate = 5:2) to afford the compound **3h** as a yellow solid (m. p. 117-118°C) in 94% yield (161.2 mg).

$R_f$  (petroleum ether/ethyl acetate = 5:2): 0.34;  $^1\text{H}$  NMR (500 MHz,  $\text{CDCl}_3$ )  $\delta$  7.61 (dd,  $J = 15.5, 8.1$  Hz, 4H), 7.23-7.16 (m, 9H), 7.11 (d,  $J = 7.7$  Hz, 1H), 6.99 (d,  $J = 7.8$  Hz, 1H), 6.75 (s, 1H), 5.77 (d,  $J = 8.5$  Hz, 1H), 4.16 (dd,  $J = 14.6, 3.1$  Hz, 1H), 3.35 (dd,  $J = 14.2, 8.8$  Hz, 1H), 3.12 (dd,  $J = 14.2, 4.6$  Hz, 1H), 2.97-2.88 (m, 1H), 2.37 (s, 3H), 2.34 (s, 3H), 2.28 (s, 4H), 1.74 (d,  $J = 12.6$  Hz, 1H), 1.58 (d,  $J = 13.4$  Hz, 1H);  $^{13}\text{C}$  NMR (126 MHz,  $\text{CDCl}_3$ )  $\delta$  144.74, 143.35, 141.57, 139.98, 139.34, 138.62, 138.39, 137.57, 136.39, 130.53, 130.21, 129.92, 129.42, 129.28, 129.13, 128.55, 128.12, 127.89, 127.74, 127.36, 63.00, 50.03, 34.35, 33.42, 21.62, 21.55, 21.03; HRMS (ESI) calcd for  $\text{C}_{33}\text{H}_{33}\text{NNaO}_4\text{S}_2[\text{M}+\text{Na}]^+$ : 594.1743, found: 594.1737.

**(Z)-9-chloro-6-phenyl-1-tosyl-4-(tosylmethyl)-1,2,3,4-tetrahydrobenzo[b]azocine (3i)**

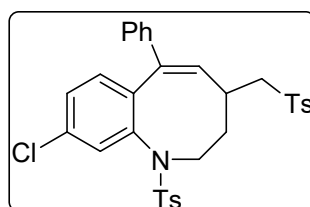

**1i** (0.30 mmol, 131.7 mg) was reacted with TsSePh **2a** (0.39 mmol, 121.67 mg) according to General Procedure. The crude product was purified by column chromatography (petroleum ether: ethyl acetate = 5:2) to afford the compound **3i** as a yellow solid (m. p. 62-63°C) in 78% yield (138.6 mg).

$R_f$  (petroleum ether/ethyl acetate = 5:2): 0.15;  $^1\text{H NMR}$  (500 MHz,  $\text{CDCl}_3$ )  $\delta$  7.62 (dd,  $J = 10.0$ , 8.4 Hz, 4H), 7.28 (dd,  $J = 8.3$ , 1.9 Hz, 1H), 7.26-7.18 (m, 9H), 7.06 (d,  $J = 8.3$  Hz, 1H), 6.93 (d,  $J = 1.8$  Hz, 1H), 5.87 (d,  $J = 8.6$  Hz, 1H), 4.16 (dd,  $J = 14.7$ , 3.2 Hz, 1H), 3.35 (dd,  $J = 14.1$ , 8.8 Hz, 1H), 3.14 (dd,  $J = 14.2$ , 4.8 Hz, 1H), 2.93-85 (m, 1H), 2.40 (s, 3H), 2.37 (s, 3H), 2.27-2.21 (m, 1H), 1.84-1.74 (m, 1H), 1.61 (d,  $J = 13.5$  Hz, 1H);  $^{13}\text{C NMR}$  (126 MHz,  $\text{CDCl}_3$ )  $\delta$  144.87, 143.77, 141.10, 141.00, 140.25, 137.74, 137.04, 136.30, 134.06, 131.88, 130.97, 129.94, 129.67, 128.87, 128.78, 128.56, 128.06, 128.02, 127.66, 62.71, 50.04, 34.35, 33.02, 21.62, 21.58; **HRMS (ESI)** calcd for  $\text{C}_{32}\text{H}_{30}\text{ClNNaO}_4\text{S}_2[\text{M}+\text{Na}]^+$ : 614.1197, found: 614.1190.

**(Z)-9-bromo-6-phenyl-1-tosyl-4-(tosylmethyl)-1,2,3,4-tetrahydrobenzo[b]azocine (3j)**

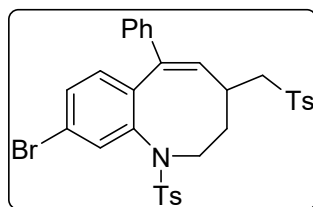

**1j** (0.30 mmol, 145.3 mg) was reacted with **TsSePh 2a** (0.39 mmol, 121.67 mg) according to General Procedure. The crude product was purified by column chromatography (petroleum ether: ethyl acetate = 5:2) to afford the compound **3j** as a yellow solid (m. p. 100-101°C) in 75% yield (143.2 mg).

$R_f$  (petroleum ether/ethyl acetate = 5:2): 0.35;  $^1\text{H NMR}$  (500 MHz,  $\text{CDCl}_3$ )  $\delta$  7.62 (dd,  $J = 10.5$ , 8.3 Hz, 4H), 7.43 (dd,  $J = 8.3$ , 1.7 Hz, 1H), 7.26-7.19 (m, 9H), 7.06 (d,  $J = 1.6$  Hz, 1H), 7.00 (d,  $J = 8.3$  Hz, 1H), 5.87 (d,  $J = 8.6$  Hz, 1H), 4.16 (dd,  $J = 14.7$ , 3.2 Hz, 1H), 3.35 (dd,  $J = 14.1$ , 8.7 Hz, 1H), 3.14 (dd,  $J = 14.2$ , 4.8 Hz, 1H), 2.93-2.85 (m, 1H), 2.40 (s, 3H), 2.38 (s, 3H), 2.28-2.21 (m, 1H), 1.83-1.74 (m, 1H), 1.62 (d,  $J = 13.6$  Hz, 1H);  $^{13}\text{C NMR}$  (126 MHz,  $\text{CDCl}_3$ )  $\delta$  144.87, 143.78, 141.26, 140.92, 140.72, 137.80, 137.00, 136.29, 132.12, 131.82, 131.66, 130.95, 129.94, 129.66, 128.56, 128.06, 128.02, 127.67, 121.82, 62.71, 50.04, 34.35, 32.98, 21.63, 21.58; **HRMS (ESI)** calcd for  $\text{C}_{32}\text{H}_{30}\text{NNaO}_4\text{S}_2[\text{M}+\text{Na}]^+$ : 658.0692, found: 658.0687.

**(E)-8-chloro-6-(2-chlorophenyl)-1-tosyl-4-(tosylmethyl)-1,2,3,4-tetrahydrobenzo[b]azocine (3k)**

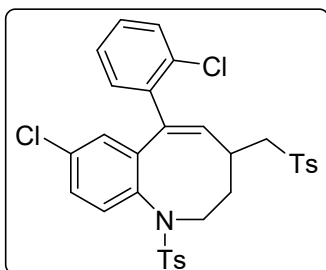

**1k** (0.30 mmol, 141.3 mg) was reacted with TsSePh **2a** (0.39 mmol, 121.67 mg) according to General Procedure. The crude product was purified by column chromatography (petroleum ether: ethyl acetate = 5:2) to afford the compound **3k** as a yellow solid (m. p. 104-105°C) in 77% yield (144.7 mg).

$R_f$ (petroleum ether/ethyl acetate = 5:2): 0.37;  $^1\text{H NMR}$  (500 MHz,  $\text{CDCl}_3$ )  $\delta$  7.71 (d,  $J = 8.0$  Hz, 2H), 7.64 (d,  $J = 7.3$  Hz, 2H), 7.54 (d,  $J = 15.6$  Hz, 1H), 7.43-7.40 (m, 1H), 7.29 (dd,  $J = 28.2, 7.5$  Hz, 5H), 7.18 (dd,  $J = 6.2, 2.5$  Hz, 3H), 6.91 (d,  $J = 2.4$  Hz, 1H), 6.78 (d,  $J = 8.5$  Hz, 1H), 5.73 (d,  $J = 8.1$  Hz, 1H), 4.22 (s, 1H), 3.33-3.18 (m, 2H), 2.94 (s, 1H), 2.44 (m, 7H), 2.14 (d,  $J = 13.8$  Hz, 1H), 1.89-1.79 (m, 1H);  $^{13}\text{C NMR}$  (126 MHz,  $\text{CDCl}_3$ )  $\delta$  144.94, 143.87, 142.90, 139.81, 137.90, 137.00, 136.35, 136.20, 134.41, 132.88, 132.78, 132.57, 130.23, 129.94, 129.84, 129.73, 129.37, 129.27, 128.80, 127.79, 127.76, 127.03, 60.48, 50.49, 34.32, 31.11, 21.66, 21.61; **HRMS (ESI)** calcd for  $\text{C}_{32}\text{H}_{29}\text{Cl}_2\text{NNaO}_4\text{S}_2[\text{M}+\text{Na}]^+$ : 648.0807, found: 648.0809.

**(E)-8-bromo-6-(2-chlorophenyl)-1-tosyl-4-(tosylmethyl)-1,2,3,4-tetrahydrobenzo[*b*]azocine (3l)**

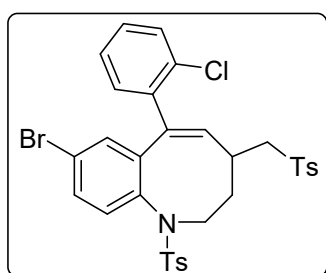

**1l** (0.30 mmol, 154.5 mg) was reacted with TsSePh **2a** (0.39 mmol, 121.67 mg) according to General Procedure. The crude product was purified by column chromatography (petroleum ether: ethyl acetate = 5:2) to afford the compound **3l** as a yellow solid (m. p. 113-114°C) in 71% yield (142.1 mg).

$R_f$ (petroleum ether/ethyl acetate = 5:2): 0.23;  $^1\text{H NMR}$  (500 MHz,  $\text{CDCl}_3$ )  $\delta$  7.73-7.54 (m, 5H), 7.43-7.39 (m, 1H), 7.29 (dd,  $J = 24.9, 8.6$  Hz, 5H), 7.20-7.16 (m, 2H), 7.06 (d,  $J = 2.3$  Hz, 1H),

6.71 (d,  $J = 8.5$  Hz, 1H), 5.73 (d,  $J = 8.1$  Hz, 1H), 4.22 (s, 1H), 3.32-3.18 (m, 2H), 2.93 (s, 1H), 2.45 (m, 7H), 2.14 (d,  $J = 13.8$  Hz, 1H), 1.83 (d,  $J = 10.2$  Hz, 1H);  $^{13}\text{C NMR}$  (126 MHz,  $\text{CDCl}_3$ )  $\delta$  144.96, 143.89, 143.20, 139.78, 138.44, 136.98, 136.35, 136.30, 133.17, 132.88, 132.59, 132.27, 129.96, 129.85, 129.75, 129.66, 128.81, 127.79, 127.76, 127.04, 122.55, 60.52, 50.49, 34.28, 31.18, 21.71, 21.61; **HRMS (ESI)** calcd for  $\text{C}_{32}\text{H}_{30}\text{BrClNO}_4\text{S}_2[\text{M}+\text{H}]^+$ : 670.0483, found: 670.0480.

**(E)-8-chloro-6-(2-fluorophenyl)-1-tosyl-4-(tosylmethyl)-1,2,3,4-tetrahydrobenzo[b]azocine**

**(3m)**

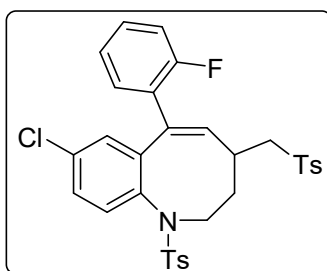

**1m** (0.30 mmol, 136.5 mg) was reacted with **TsSePh 2a** (0.39 mmol, 121.67 mg) according to General Procedure. The crude product was purified by column chromatography (petroleum ether: ethyl acetate = 5:2) to afford the compound **3m** as a yellow solid (m. p. 103-104°C) in 67% yield (122.3 mg).

**R<sub>f</sub>** (petroleum ether/ethyl acetate = 5:2): 0.35;  $^1\text{H NMR}$  (500 MHz,  $\text{CDCl}_3$ )  $\delta$  7.64 (t,  $J = 6.9$  Hz, 4H), 7.26-7.20 (m, 7H), 7.08-6.99 (m, 3H), 6.84 (d,  $J = 8.5$  Hz, 1H), 5.99 (d,  $J = 8.6$  Hz, 1H), 4.21 (d,  $J = 13.5$  Hz, 1H), 3.29-3.18 (m, 2H), 2.91 (t,  $J = 12.6$  Hz, 1H), 2.41 (s, 3H), 2.39 (s, 3H), 2.31 (t,  $J = 15.0$  Hz, 1H), 1.93 (d,  $J = 13.4$  Hz, 1H), 1.83-1.75 (m, 1H);  $^{13}\text{C NMR}$  (126 MHz,  $\text{CDCl}_3$ )  $\delta$  161.29, 159.31, 144.91, 143.71, 142.92, 138.61, 137.14, 136.14, 135.37 (d,  $J = 6.5$  Hz), 134.28, 132.59, 130.85, 130.32, 129.89, 129.69, 129.41, 129.12 (d,  $J = 8.5$  Hz), 127.91, 127.66, 124.09 (d,  $J = 3.4$  Hz), 115.85, 115.67, 61.81, 50.47, 34.25, 32.26, 21.62, 21.57;  $^{19}\text{F NMR}$  (471 MHz,  $\text{CDCl}_3$ )  $\delta$  -115.22; **HRMS (ESI)** calcd for  $\text{C}_{32}\text{H}_{29}\text{ClFNNaO}_4\text{S}_2[\text{M}+\text{Na}]^+$ : 632.1103, found: 632.1101.

**(Z)-8-bromo-6-(o-tolyl)-1-tosyl-4-(tosylmethyl)-1,2,3,4-tetrahydrobenzo[b]azocine (3n)**

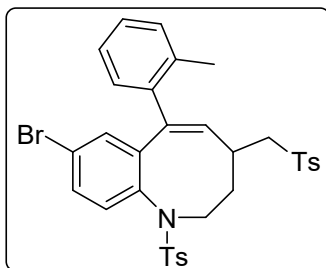

**1n** (0.30 mmol, 148.5 mg) was reacted with TsSePh **2a** (0.39 mmol, 121.67 mg) according to General Procedure. The crude product was purified by column chromatography (petroleum ether: ethyl acetate = 5:2) to afford the compound **3n** as a yellow solid (m. p. 124-125°C) in 62% yield (121.0 mg).

**R<sub>f</sub>** (petroleum ether/ethyl acetate = 5:2): 0.35; **<sup>1</sup>H NMR** (500 MHz, CDCl<sub>3</sub>) δ 7.73 (d, *J* = 8.0 Hz, 2H), 7.63 (d, *J* = 7.8 Hz, 2H), 7.39 (s, 1H), 7.35-7.09 (m, 9H), 7.01 (d, *J* = 1.9 Hz, 1H), 6.80 (d, *J* = 8.5 Hz, 1H), 5.57 (d, *J* = 7.8 Hz, 1H), 4.16 (s, 1H), 3.24 (s, 1H), 3.15 (dd, *J* = 14.1, 3.9 Hz, 1H), 2.92 (s, 1H), 2.43 (s, 3H), 2.41 (s, 3H), 2.35 (s, 3H), 1.92 (d, *J* = 13.3 Hz, 1H), 1.83-1.66 (m, 2H); **<sup>13</sup>C NMR** (126 MHz, CDCl<sub>3</sub>) δ 144.99, 143.94, 143.82, 141.22, 138.09, 136.85, 136.33, 135.58, 135.46, 134.46, 133.23, 132.08, 131.18, 130.56, 129.98, 129.83, 129.69, 127.97, 127.82, 127.48, 126.01, 122.41, 61.27, 50.22, 34.42, 31.29, 21.69, 21.61, 20.95; **HRMS** (ESI) calcd for C<sub>33</sub>H<sub>32</sub>NNaO<sub>4</sub>S<sub>2</sub>[M+Na]<sup>+</sup>: 672.0848, found: 672.0845.

**(Z)-8-chloro-6-(p-tolyl)-1-tosyl-4-(tosylmethyl)-1,2,3,4-tetrahydrobenzo[b]azocine (3o)**

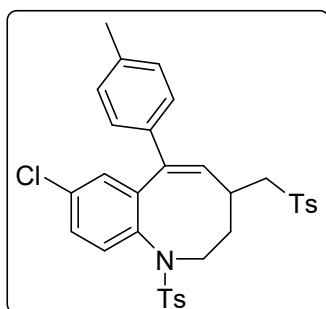

**1o** (0.30 mmol, 135.3 mg) was reacted with TsSePh **2a** (0.39 mmol, 121.67 mg) according to General Procedure. The crude product was purified by column chromatography (petroleum ether: ethyl acetate = 5:2) to afford the compound **3o** as a yellow solid (m. p. 124-125°C) in 73% yield (132.8 mg).

**R<sub>f</sub>** (petroleum ether/ethyl acetate = 5:2): 0.35; **<sup>1</sup>H NMR** (500 MHz, CDCl<sub>3</sub>) δ 7.59 (dd, *J* = 11.3, 8.2 Hz, 4H), 7.24-7.14 (m, 7H), 7.08 (dd, *J* = 5.1, 2.4 Hz, 3H), 6.84 (d, *J* = 8.5 Hz, 1H), 5.90 (d, *J* = 8.6 Hz, 1H), 4.16 (dd, *J* = 14.7, 3.6 Hz, 1H), 3.34 (dd, *J* = 14.2, 9.0 Hz, 1H), 3.14 (dd, *J* = 14.2,

4.7 Hz, 1H), 2.88-2.80 (m, 1H), 2.39-2.32 (m, 9H), 2.06 (dd,  $J = 9.4, 4.7$  Hz, 1H), 1.76 (d,  $J = 5.0$  Hz, 1H), 1.57 (d,  $J = 13.5$  Hz, 1H);  $^{13}\text{C}$  NMR (126 MHz,  $\text{CDCl}_3$ )  $\delta$  144.93, 143.61, 143.40, 138.73, 137.95, 137.55, 137.44, 137.22, 135.78, 134.01, 130.73, 130.42, 130.00, 129.91, 129.62, 129.28, 128.88, 128.47, 128.11, 127.62, 62.60, 50.12, 34.37, 32.97, 21.62, 21.55, 21.22; HRMS (ESI) calcd for  $\text{C}_{33}\text{H}_{33}\text{ClNO}_4\text{S}_2[\text{M}+\text{H}]^+$ : 606.1534, found: 606.1532.

**(Z)-9-fluoro-6-(p-tolyl)-1-tosyl-4-(tosylmethyl)-1,2,3,4-tetrahydrobenzo[b]azocine (3p)**

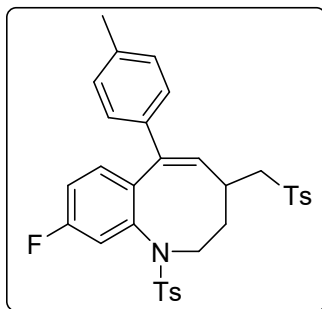

**1p** (0.30 mmol, 131.1mg) was reacted with TsSePh **2a** (0.39 mmol, 121.67 mg) according to General Procedure. The crude product was purified by column chromatography (petroleum ether: ethyl acetate = 5:2) to afford the compound **3p** as a yellow solid (m. p. 98-99°C) in 61% yield (107.9 mg).

$R_f$ (petroleum ether/ethyl acetate = 5:2): 0.25;  $^1\text{H}$  NMR (500 MHz,  $\text{CDCl}_3$ )  $\delta$  7.62 (dd,  $J = 11.6, 8.2$  Hz, 4H), 7.22 (t,  $J = 8.1$  Hz, 4H), 7.11-7.00 (m, 6H), 6.67 (dd,  $J = 9.1, 2.4$  Hz, 1H), 5.80 (d,  $J = 8.6$  Hz, 1H), 4.16 (dd,  $J = 14.8, 3.2$  Hz, 1H), 3.35 (dd,  $J = 14.2, 8.5$  Hz, 1H), 3.14 (dd,  $J = 14.2, 5.0$  Hz, 1H), 2.95-2.85 (m, 1H), 2.40 (s, 3H), 2.38 (s, 3H), 2.32 (s, 3H), 2.28-2.22 (m, 1H), 1.83-1.73 (m, 1H), 1.66 (s, 1H);  $^{13}\text{C}$  NMR (126 MHz,  $\text{CDCl}_3$ )  $\delta$  163.12, 161.13, 144.79, 143.68, 141.22 (d,  $J = 9.2$  Hz), 138.38, 137.96 (d,  $J = 3.4$  Hz), 137.67, 137.26 (d,  $J = 29.7$  Hz), 136.40, 132.12 (d,  $J = 9.0$  Hz), 129.91, 129.78, 129.65, 128.73, 128.37, 128.04, 127.66, 115.91 (d,  $J = 21.0$  Hz), 115.50 (d,  $J = 21.1$  Hz), 62.77, 50.06, 34.29, 33.21, 21.61, 21.55, 21.17;  $^{19}\text{F}$  NMR (471 MHz,  $\text{CDCl}_3$ )  $\delta$  -111.42; HRMS (ESI) calcd for  $\text{C}_{33}\text{H}_{32}\text{FNNaO}_4\text{S}_2[\text{M}+\text{Na}]^+$ : 612.1649, found: 612.1639.

**(Z)-6-(4-fluorophenyl)-1-tosyl-4-(tosylmethyl)-1,2,3,4-tetrahydrobenzo[b]azocine (3q)**

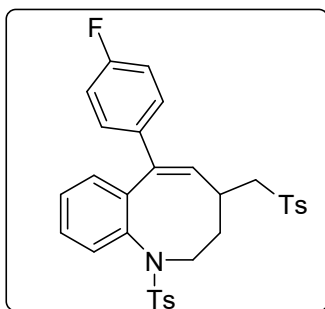

**1q** (0.30 mmol, 126.3 mg) was reacted with TsSePh **2a** (0.39 mmol, 121.67 mg) according to General Procedure. The crude product was purified by column chromatography (petroleum ether: ethyl acetate = 5:2) to afford the compound **3q** as a yellow solid (m. p. 88-89°C) in 73% yield (126.1 mg).

**R<sub>f</sub>** (petroleum ether/ethyl acetate = 5:2): 0.27; **<sup>1</sup>H NMR** (500 MHz, CDCl<sub>3</sub>)  $\delta$  7.61 (dd,  $J$  = 8.2, 2.6 Hz, 4H), 7.32-7.19 (m, 8H), 7.11 (dd,  $J$  = 7.6, 1.3 Hz, 1H), 6.94-6.86 (m, 3H), 5.85 (d,  $J$  = 8.5 Hz, 1H), 4.18 (dd,  $J$  = 14.7, 3.4 Hz, 1H), 3.38 (dd,  $J$  = 14.2, 9.3 Hz, 1H), 3.12 (dd,  $J$  = 14.2, 4.4 Hz, 1H), 2.95-2.86 (m, 1H), 2.39 (s, 3H), 2.34 (s, 3H), 2.28-2.21 (m, 1H), 1.86-1.81 (m, 1H), 1.57 (d,  $J$  = 13.6 Hz, 1H); **<sup>13</sup>C NMR** (126 MHz, CDCl<sub>3</sub>)  $\delta$  163.38, 161.42, 144.77, 143.48, 141.51, 140.09, 137.76 (d,  $J$  = 2.8 Hz), 137.50 (d,  $J$  = 3.8 Hz), 136.23, 130.74, 130.59, 130.36 (d,  $J$  = 7.8 Hz), 129.92, 129.61, 129.37, 128.51 (d,  $J$  = 6.3 Hz), 127.96, 127.57, 124.17 (d,  $J$  = 954.9 Hz), 114.72 (d,  $J$  = 21.2 Hz), 62.88, 50.17, 34.34, 33.29, 21.59, 21.54; **HRMS** (ESI) calcd for C<sub>32</sub>H<sub>30</sub>FNNaO<sub>4</sub>S<sub>2</sub>[M+Na]<sup>+</sup>: 598.1492, found: 598.1485.

**(Z)-6-(4-chlorophenyl)-1-tosyl-4-(tosylmethyl)-1,2,3,4-tetrahydrobenzo[b]azocine (3r)**

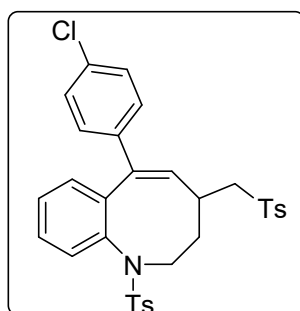

**1r** (0.30 mmol, 126.9 mg) was reacted with TsSePh **2a** (0.39 mmol, 121.67 mg) according to General Procedure. The crude product was purified by column chromatography (petroleum ether: ethyl acetate = 5:2) to afford the compound **3r** as a yellow solid (m. p. 88-89°C) in 71% yield (126.1 mg).

**R<sub>f</sub>** (petroleum ether/ethyl acetate = 5:2): 0.27; **<sup>1</sup>H NMR** (500 MHz, CDCl<sub>3</sub>)  $\delta$  7.61 (dd,  $J$  = 7.9,



6.2 Hz, 4H), 7.33-7.26 (m, 2H), 7.23-7.16 (m, 8H), 7.10 (dd,  $J = 7.5, 1.3$  Hz, 1H), 6.88 (d,  $J = 7.6$  Hz, 1H), 5.89 (d,  $J = 8.5$  Hz, 1H), 4.18 (dd,  $J = 14.7, 3.5$  Hz, 1H), 3.38 (dd,  $J = 14.2, 9.2$  Hz, 1H), 3.12 (dd,  $J = 14.2, 4.4$  Hz, 1H), 2.95-2.86 (m, 1H), 2.39 (s, 3H), 2.34 (s, 3H), 2.26 (dd,  $J = 10.5, 5.4$  Hz, 1H), 1.90-1.81 (m, 1H), 1.58 (d,  $J = 13.5$  Hz, 1H);  $^{13}\text{C}$  NMR (126 MHz,  $\text{CDCl}_3$ )  $\delta$  144.79, 143.49, 141.21, 140.17, 140.03, 137.46, 137.45, 136.25, 133.27, 131.14, 130.69, 129.96, 129.92, 129.60, 129.46, 128.61, 128.52, 128.06, 127.57, 62.83, 50.17, 34.37, 33.28, 21.61, 21.55; HRMS (ESI) calcd for  $\text{C}_{32}\text{H}_{30}\text{ClNNaO}_4\text{S}_2[\text{M}+\text{Na}]^+$ : 614.1197, found: 614.1191.

**(Z)-6-(4-bromophenyl)-1-tosyl-4-(tosylmethyl)-1,2,3,4-tetrahydrobenzo[b]azocine (3s)**

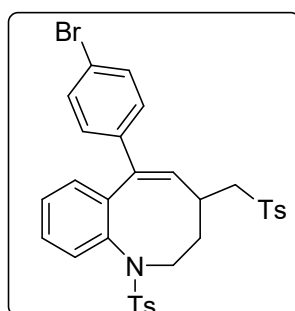

**1s** (0.30 mmol, 144.3 mg) was reacted with TsSePh **2a** (0.39 mmol, 121.67 mg) according to General Procedure. The crude product was purified by column chromatography (petroleum ether: ethyl acetate = 5:2) to afford the compound **3s** as a yellow solid (m. p. 82-83°C) in 73% yield (139.4 mg).

$R_f$ (petroleum ether/ethyl acetate = 5:2): 0.35;  $^1\text{H}$  NMR (500 MHz,  $\text{CDCl}_3$ )  $\delta$  7.62 (dd,  $J = 13.3, 8.1$  Hz, 4H), 7.36 (d,  $J = 8.4$  Hz, 2H), 7.34-7.25 (m, 2H), 7.25-7.21 (m, 4H), 7.10 (t,  $J = 9.0$  Hz, 3H), 6.91 (d,  $J = 7.7$  Hz, 1H), 5.88 (d,  $J = 8.5$  Hz, 1H), 4.20 (dd,  $J = 14.6, 3.6$  Hz, 1H), 3.37 (dd,  $J = 14.1, 9.1$  Hz, 1H), 3.13 (dd,  $J = 14.1, 4.5$  Hz, 1H), 2.92 (dd,  $J = 19.6, 7.5$  Hz, 1H), 2.41 (s, 3H), 2.38 (s, 3H), 2.31 (dd,  $J = 9.8, 5.4$  Hz, 1H), 1.92-1.82 (m, 1H), 1.60 (s, 1H);  $^{13}\text{C}$  NMR (126 MHz,  $\text{CDCl}_3$ )  $\delta$  144.80, 143.46, 141.13, 140.37, 140.19, 137.66, 137.45, 136.36, 131.03, 130.71, 130.23, 129.92, 129.56, 129.47, 128.63, 128.52, 128.09, 127.60, 121.67, 62.88, 50.13, 34.34, 33.29, 21.63, 21.56.; HRMS (ESI) calcd for  $\text{C}_{32}\text{H}_{30}\text{BrNNaO}_4\text{S}_2[\text{M}+\text{Na}]^+$ : 658.0692, found: 658.0684.

**(Z)-6-(o-tolyl)-1-tosyl-4-(tosylmethyl)-1,2,3,4-tetrahydrobenzo[b]azocine (3t)**

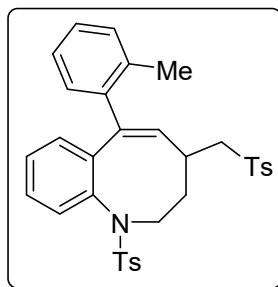

**1t** (0.30 mmol, 125.1 mg) was reacted with TsSePh **2a** (0.39 mmol, 121.67 mg) according to General Procedure. The crude product was purified by column chromatography (petroleum ether: ethyl acetate = 5:2) to afford the compound **3t** as a yellow solid (m. p. 100-101°C) in 63% yield (108.1 mg).

**R<sub>f</sub>** (petroleum ether/ethyl acetate = 5:2): 0.35; **<sup>1</sup>H NMR** (500 MHz, CDCl<sub>3</sub>)  $\delta$  7.77 (d,  $J$  = 8.1 Hz, 2H), 7.66 (d,  $J$  = 8.1 Hz, 2H), 7.38 (s, 1H), 7.31 (d,  $J$  = 8.1 Hz, 2H), 7.28-7.24 (m, 2H), 7.20 (dd,  $J$  = 6.3, 2.5 Hz, 3H), 7.15 (dd,  $J$  = 10.4, 4.2 Hz, 1H), 7.10 (t,  $J$  = 7.3 Hz, 1H), 6.95-6.89 (m, 2H), 5.54 (d,  $J$  = 7.5 Hz, 1H), 4.16 (s, 1H), 3.28 (s, 1H), 3.15 (dd,  $J$  = 14.1, 3.9 Hz, 1H), 2.99 (s, 1H), 2.66 (s, 1H), 2.46-2.36 (m, 9H), 1.93 (d,  $J$  = 13.6 Hz, 1H), 1.84-1.76 (m, 1H); **<sup>13</sup>C NMR** (126 MHz, CDCl<sub>3</sub>)  $\delta$  144.76, 143.63, 141.74, 137.22, 136.71, 136.46, 135.55, 133.34, 131.20, 130.57, 130.32, 129.96, 129.70, 128.88, 128.43, 128.02, 127.93, 127.78, 127.14, 125.86, 61.19, 50.06, 34.24, 31.03, 21.63, 21.59, 20.88; **HRMS** (ESI) calcd for C<sub>33</sub>H<sub>33</sub>NNaO<sub>4</sub>S<sub>2</sub>[M+Na]<sup>+</sup>: 594.1743, found: 594.1740.

**(Z)-6-(m-tolyl)-1-tosyl-4-(tosylmethyl)-1,2,3,4-tetrahydrobenzo[b]azocine (3u)**

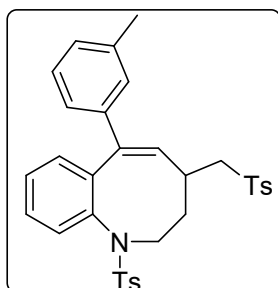

**1u** (0.30 mmol, 125.1 mg) was reacted with TsSePh **2a** (0.39 mmol, 121.67 mg) according to General Procedure. The crude product was purified by column chromatography (petroleum ether: ethyl acetate = 10:3) to afford the compound **3u** as a yellow solid (m. p. 83-84°C) in 89% yield (152.7 mg).

**R<sub>f</sub>** (petroleum ether/ethyl acetate = 5:2): 0.17; **<sup>1</sup>H NMR** (500 MHz, CDCl<sub>3</sub>)  $\delta$  7.65-7.60 (m, 4H),

7.31-7.25 (m, 3H), 7.21 (dd,  $J = 15.7, 8.0$  Hz, 4H), 7.13-7.10 (m, 2H), 7.04 (d,  $J = 7.3$  Hz, 1H), 7.01 (s, 1H), 6.96 (dd,  $J = 10.9, 4.4$  Hz, 2H), 5.80 (d,  $J = 8.5$  Hz, 1H), 4.19 (dd,  $J = 14.7, 3.0$  Hz, 1H), 3.36 (dd,  $J = 14.2, 8.5$  Hz, 1H), 3.14 (dd,  $J = 14.2, 4.9$  Hz, 1H), 2.98-2.90 (m, 1H), 2.43 (dd,  $J = 11.1, 4.7$  Hz, 1H), 2.39 (s, 3H), 2.36 (s, 3H), 2.30 (s, 3H), 1.84-1.75 (m, 1H), 1.63 (d,  $J = 13.6$  Hz, 1H);  $^{13}\text{C}$  NMR (126 MHz,  $\text{CDCl}_3$ )  $\delta$  144.72, 143.30, 141.58, 141.37, 140.16, 138.77, 137.56, 137.28, 136.38, 130.88, 130.27, 129.89, 129.48, 129.22, 128.98, 128.60, 128.33, 128.24, 128.14, 127.80, 127.72, 125.94, 63.00, 50.18, 34.30, 33.33, 21.62, 21.54, 21.52; HRMS (ESI) calcd for  $\text{C}_{33}\text{H}_{33}\text{NNaO}_4\text{S}_2[\text{M}+\text{Na}]^+$ : 594.1743, found: 594.1733.

**(Z)-6-(p-tolyl)-1-tosyl-4-(tosylmethyl)-1,2,3,4-tetrahydrobenzo[b]azocine (3v)**

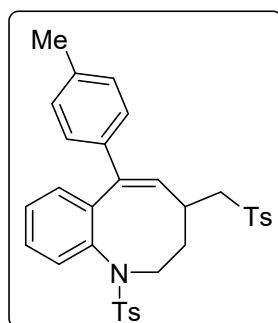

**1v** (0.30 mmol, 125.2 mg) was reacted with TsSePh **2a** (0.39 mmol, 121.67 mg) according to General Procedure. The crude product was purified by column chromatography (petroleum ether: ethyl acetate = 5:2) to afford the compound **3v** as a yellow solid (m. p. 84-85°C) in 70% yield (120.1 mg).

$R_f$  (petroleum ether/ethyl acetate = 5:2): 0.20;  $^1\text{H}$  NMR (500 MHz,  $\text{CDCl}_3$ )  $\delta$  7.62 (dd,  $J = 11.4, 8.2$  Hz, 4H), 7.30-7.18 (m, 7H), 7.12 (dd,  $J = 7.3, 1.7$  Hz, 1H), 7.06 (q,  $J = 8.3$  Hz, 4H), 6.93 (dd,  $J = 7.6, 1.0$  Hz, 1H), 5.78 (d,  $J = 8.5$  Hz, 1H), 4.19 (dd,  $J = 14.7, 3.2$  Hz, 1H), 3.36 (dd,  $J = 14.2, 8.6$  Hz, 1H), 3.13 (dd,  $J = 14.2, 4.9$  Hz, 1H), 2.97-2.90 (m, 1H), 2.39 (s, 3H), 2.37 (s, 3H), 2.32 (s, 3H), 2.27 (dd,  $J = 9.0, 5.3$  Hz, 1H), 1.83-1.75 (m, 1H), 1.61 (d,  $J = 13.6$  Hz, 1H);  $^{13}\text{C}$  NMR (126 MHz,  $\text{CDCl}_3$ )  $\delta$  144.70, 143.30, 141.68, 140.16, 138.58, 138.50, 137.59, 137.18, 136.37, 130.87, 129.90, 129.56, 129.49, 129.18, 128.64, 128.60, 128.43, 128.32, 128.11, 127.69, 62.98, 50.17, 34.28, 33.35, 21.62, 21.54, 21.19; HRMS (ESI) calcd for  $\text{C}_{33}\text{H}_{33}\text{NNaO}_4\text{S}_2[\text{M}+\text{Na}]^+$ : 594.1743, found: 594.1735.

**(Z)-6-phenyl-4-((phenylsulfonyl)methyl)-1-tosyl-1,2,3,4-tetrahydrobenzo[b]azocine (3aa)**

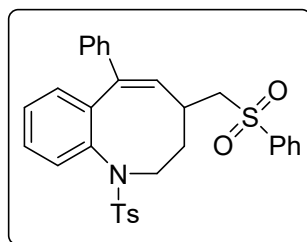

**1a** (0.30 mmol, 121.06 mg) was reacted with **2e** (0.39 mmol, 115.92 mg) according to General Procedure. The crude product was purified by column chromatography (petroleum ether: ethyl acetate = 10:3) to afford the compound **3aa** as a white solid (m. p. 81-83°C) in 93% yield (151.7mg).

$R_f$ (petroleum ether/ethyl acetate = 10:3): 0.11;  $^1\text{H NMR}$  (500 MHz,  $\text{CDCl}_3$ )  $\delta$  7.75 (t,  $J = 8.9$  Hz, 2H), 7.62 (d,  $J = 8.1$  Hz, 2H), 7.55 (t,  $J = 7.4$  Hz, 1H), 7.43 (t,  $J = 7.7$  Hz, 2H), 7.37-7.18 (m, 9H), 7.13 (dd,  $J = 7.4, 1.5$  Hz, 1H), 6.94 (dd,  $J = 23.0, 7.0$  Hz, 1H), 5.89 (d,  $J = 8.5$  Hz, 1H), 4.20 (dd,  $J = 14.7, 3.1$  Hz, 1H), 3.39 (dd,  $J = 14.2, 8.7$  Hz, 1H), 3.16 (dd,  $J = 14.2, 5.0$  Hz, 1H), 2.98-2.88 (m, 1H), 2.39 (s, 3H), 2.29 (dd,  $J = 9.6, 5.0$  Hz, 1H), 1.88-1.79 (m, 1H), 1.63 (d,  $J = 13.6$  Hz, 1H);  $^{13}\text{C NMR}$  (126 MHz,  $\text{CDCl}_3$ )  $\delta$  143.36, 141.55, 141.49, 140.16, 139.26, 138.77, 137.55, 133.72, 130.92, 130.33, 129.53, 129.30, 128.67, 128.56, 128.44, 128.05, 127.97, 127.68, 127.49, 62.79, 50.18, 34.26, 33.24, 21.55; **HRMS** (ESI) calcd for  $\text{C}_{31}\text{H}_{29}\text{NNaO}_4\text{S}_2[\text{M}+\text{Na}]^+$ : 566.1430, found: 566.1424.

**(Z)-4-(((4-fluorophenyl)sulfonyl)methyl)-6-phenyl-1-tosyl-1,2,3,4-tetrahydrobenzo[b]azocine (3ab)**

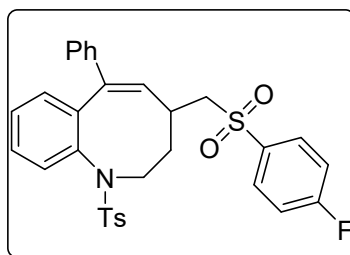

**1a** (0.30 mmol, 121.06 mg) was reacted with **2b** (0.33 mmol, 122.93 mg) according to General Procedure. The crude product was purified by column chromatography (petroleum ether: ethyl acetate = 10:3) to afford the compound **3ab** as a yellow solid (m. p. 96-97°C) in 66% yield (111.2 mg).

$R_f$ (petroleum ether/ethyl acetate = 10:3): 0.11;  $^1\text{H NMR}$  (500 MHz,  $\text{CDCl}_3$ )  $\delta$  7.77 (dd,  $J = 8.6, 5.0$  Hz, 2H), 7.62 (d,  $J = 8.1$  Hz, 2H), 7.33-7.20 (m, 9H), 7.14-7.07 (m, 3H), 6.92 (d,  $J = 7.6$  Hz, 1H), 5.90 (d,  $J = 8.5$  Hz, 1H), 4.21 (dd,  $J = 14.7, 3.2$  Hz, 1H), 3.38 (dd,  $J = 14.2, 8.8$  Hz, 1H), 3.15

(dd,  $J = 14.2, 4.9$  Hz, 1H), 2.93 (t,  $J = 12.1$  Hz, 1H), 2.40 (s, 3H), 2.25 (dd,  $J = 9.5, 4.9$  Hz, 1H), 1.91-1.79 (m, 1H), 1.63 (s, 1H);  $^{13}\text{C}$  NMR (126 MHz,  $\text{CDCl}_3$ )  $\delta$  166.78, 164.74, 143.40, 141.52, 141.33, 140.18, 138.84, 137.51, 135.23 (d,  $J = 3.1$  Hz), 130.97 (d,  $J = 9.4$  Hz), 130.81, 130.12, 129.55, 129.37, 128.62, 128.44, 128.03, 127.66, 127.59, 116.59 (d,  $J = 22.5$  Hz), 62.89, 50.15, 34.35, 33.21, 21.55;  $^{19}\text{F}$  NMR (471 MHz,  $\text{CDCl}_3$ )  $\delta$  -103.32; HRMS (ESI) calcd for  $\text{C}_{31}\text{H}_{28}\text{FNNaO}_4\text{S}_2[\text{M}+\text{Na}]^+$ : 584.1336, found: 584.1327.

**(Z)-4-(((4-chlorophenyl)sulfonyl)methyl)-6-phenyl-1-tosyl-1,2,3,4-tetrahydrobenzo[b]azocine(3ac)**

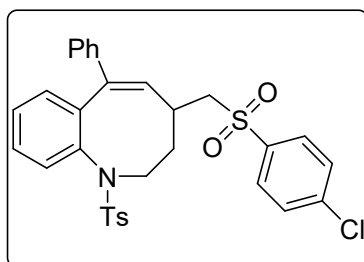

**1a** (0.30 mmol, 121.06 mg) was reacted with **2c** (0.39 mmol, 129.35 mg) according to General Procedure. The crude product was purified by column chromatography (petroleum ether: ethyl acetate = 10:3) to afford the compound **3ac** as a yellow solid (m. p. 103-104°C) in 75% yield (130.1 mg).

$R_f$  (petroleum ether/ethyl acetate = 10:3): 0.11;  $^1\text{H}$  NMR (500 MHz,  $\text{CDCl}_3$ )  $\delta$  7.65 (dd,  $J = 35.7, 8.3$  Hz, 4H), 7.39 (d,  $J = 8.5$  Hz, 2H), 7.32-7.19 (m, 9H), 7.13-7.08 (m, 1H), 6.92 (d,  $J = 7.5$  Hz, 1H), 5.86 (d,  $J = 8.5$  Hz, 1H), 4.21 (dd,  $J = 14.7, 3.2$  Hz, 1H), 3.39 (dd,  $J = 14.2, 8.9$  Hz, 1H), 3.16 (dd,  $J = 14.3, 4.7$  Hz, 1H), 2.99-2.88 (m, 1H), 2.40 (s, 3H), 2.25 (dd,  $J = 9.5, 4.7$  Hz, 1H), 1.92-1.78 (m, 1H), 1.62 (s, 1H);  $^{13}\text{C}$  NMR (126 MHz,  $\text{CDCl}_3$ )  $\delta$  143.39, 141.48, 141.22, 140.51, 140.17, 138.91, 137.63, 137.51, 130.76, 129.98, 129.62, 129.59, 129.55, 129.38, 128.61, 128.57, 128.46, 128.04, 127.66, 127.60, 62.83, 50.12, 34.36, 33.28, 21.55; HRMS (ESI) calcd for  $\text{C}_{31}\text{H}_{28}\text{ClNNaO}_4\text{S}_2[\text{M}+\text{Na}]^+$ : 600.1040, found: 600.1031.

**(Z)-6-phenyl-1-tosyl-4-(((4-(trifluoromethoxy)phenyl)sulfonyl)methyl)-1,2,3,4-tetrahydrobenzo[b]azocine(3ad)**

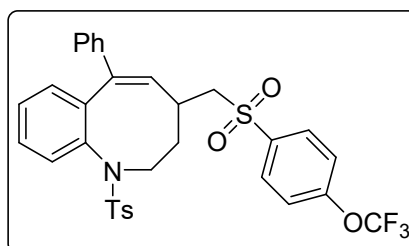

**1a** (0.30 mmol, 121.06 mg) was reacted with **2d** (0.39 mmol, 148.9 mg) according to General Procedure. The crude product was purified by column chromatography (petroleum ether: ethyl acetate = 5:2) to afford the compound **3ad** as a yellow solid (m. p. 99-100°C) in 69% yield (129.9 mg).

$R_f$  (petroleum ether/ethyl acetate = 10:3): 0.16;  $^1\text{H NMR}$  (500 MHz,  $\text{CDCl}_3$ )  $\delta$  7.79 (d,  $J = 8.7$  Hz, 2H), 7.61 (d,  $J = 8.1$  Hz, 2H), 7.32-7.19 (m, 11H), 7.14-7.09 (m, 1H), 6.90 (d,  $J = 7.5$  Hz, 1H), 5.93 (d,  $J = 8.5$  Hz, 1H), 4.19 (dd,  $J = 14.7, 3.3$  Hz, 1H), 3.40 (dd,  $J = 14.2, 9.1$  Hz, 1H), 3.16 (dd,  $J = 14.3, 4.7$  Hz, 1H), 2.94-2.85 (m, 1H), 2.38 (s, 3H), 2.26-2.16 (m, 1H), 1.89-1.79 (m, 1H), 1.59 (d,  $J = 13.5$  Hz, 1H);  $^{13}\text{C NMR}$  (126 MHz,  $\text{CDCl}_3$ )  $\delta$  152.89, 143.44, 141.49, 141.34, 140.17, 138.81, 137.49, 137.25, 130.76, 130.44, 130.09, 129.58, 129.36, 128.62, 128.44, 128.05, 127.63, 127.60, 120.89, 120.14 (q,  $J = 259.9$  Hz), 62.68, 50.14, 34.36, 33.17, 21.53;  $^{19}\text{F NMR}$  (471 MHz,  $\text{CDCl}_3$ )  $\delta$  -57.61; **HRMS** (ESI) calcd for  $\text{C}_{32}\text{H}_{28}\text{NNaO}_5\text{S}_2[\text{M}+\text{Na}]^+$ : 650.1253, found: 650.1243.

**(Z)-4-(((4-methoxyphenyl)sulfonyl)methyl)-6-phenyl-1-tosyl-1,2,3,4-tetrahydrobenzo[b]azocine(3ae)**

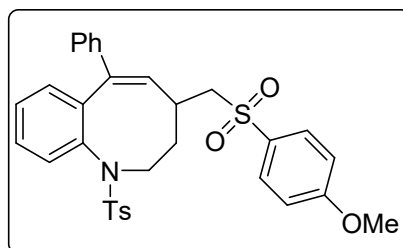

**1a** (0.30 mmol, 121.06 mg) was reacted with **2f** (0.39 mmol, 127.63 mg) according to General Procedure. The crude product was purified by column chromatography (petroleum ether: ethyl acetate = 5:2) to afford the compound **3af** as a yellow solid (m. p. 97-98°C) in 77% yield (132.5 mg).

$R_f$  (petroleum ether/ethyl acetate = 5:2): 0.3;  $^1\text{H NMR}$  (500 MHz,  $\text{CDCl}_3$ )  $\delta$  7.64 (dd,  $J = 29.3, 8.4$  Hz, 4H), 7.34-7.11 (m, 10H), 6.94 (d,  $J = 7.5$  Hz, 1H), 6.87 (d,  $J = 8.8$  Hz, 2H), 5.86 (d,  $J = 8.5$  Hz, 1H), 4.20 (dd,  $J = 14.7, 3.2$  Hz, 1H), 3.78 (s, 3H), 3.36 (dd,  $J = 14.2, 8.8$  Hz, 1H), 3.13 (dd,  $J = 14.2, 4.7$  Hz, 1H), 2.98-2.88 (m, 1H), 2.39 (s, 3H), 2.31-2.23 (m, 1H), 1.86-1.76 (m, 1H), 1.60 (d,  $J = 13.6$  Hz, 1H);  $^{13}\text{C NMR}$  (126 MHz,  $\text{CDCl}_3$ )  $\delta$  163.70, 143.36, 141.58, 141.41, 140.21, 138.60, 137.54, 130.87, 130.73, 130.52, 130.27, 129.52, 129.26, 128.61, 128.38, 127.92, 127.67, 127.45, 114.47, 63.16, 55.66, 50.17, 34.41, 33.29, 21.55; **HRMS** (ESI) calcd for  $\text{C}_{32}\text{H}_{31}\text{NNaO}_5\text{S}_2[\text{M}+\text{Na}]^+$ : 596.1936, found: 596.1929.

**(Z)-4-(((4-(tert-butyl)phenyl)sulfonyl)methyl)-6-phenyl-1-tosyl-1,2,3,4-tetrahydrobenzo[*b*]azocine (3af)**

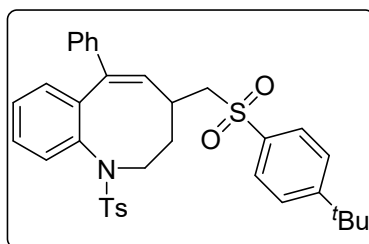

**1a** (0.30 mmol, 121.06 mg) was reacted with **2g** (0.33 mmol, 116.82 mg) according to General Procedure. The crude product was purified by column chromatography (petroleum ether: ethyl acetate = 10:3) to afford the compound **3ag** as a yellow solid (m. p. 98.6-99°C) in 70% yield (125.9 mg).

**R<sub>f</sub>**(petroleum ether/ethyl acetate = 10:3): 0.16; **<sup>1</sup>H NMR** (500 MHz, CDCl<sub>3</sub>) δ 7.64 (dd, *J* = 30.8, 8.3 Hz, 4H), 7.43 (d, *J* = 8.4 Hz, 2H), 7.30-7.18 (m, 9H), 7.13 (dd, *J* = 7.4, 1.4 Hz, 1H), 6.92 (d, *J* = 7.6 Hz, 1H), 5.91 (d, *J* = 8.5 Hz, 1H), 4.20 (dd, *J* = 14.7, 3.1 Hz, 1H), 3.37 (dd, *J* = 14.2, 8.8 Hz, 1H), 3.15 (dd, *J* = 14.2, 4.9 Hz, 1H), 2.97-2.88 (m, 1H), 2.38 (s, 3H), 2.28-2.20 (m, 1H), 1.86-1.77 (m, 1H), 1.62 (d, *J* = 13.6 Hz, 1H), 1.26 (s, 9H); **<sup>13</sup>C NMR** (126 MHz, CDCl<sub>3</sub>) δ 157.54, 143.35, 141.56, 141.53, 140.19, 138.63, 137.55, 136.08, 130.97, 130.50, 129.53, 129.19, 128.61, 128.59, 128.37, 128.01, 127.96, 127.69, 127.44, 126.30, 62.88, 50.17, 35.20, 34.30, 33.23, 31.02, 21.55; **HRMS** (ESI) calcd for C<sub>35</sub>H<sub>37</sub>NNaO<sub>4</sub>S<sub>2</sub>[M+Na]<sup>+</sup>: 622.2056, found: 622.2048.

**(Z)-4-((naphthalen-2-ylsulfonyl)methyl)-6-phenyl-1-tosyl-1,2,3,4-tetrahydrobenzo[*b*]azocine (3ag)**

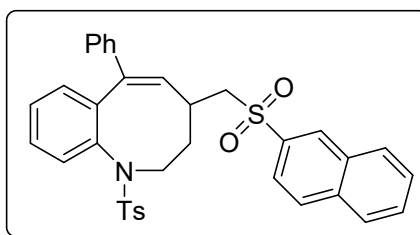

**1a** (0.30 mmol, 121.06 mg) was reacted with **2h** (0.39 mmol, 135.71 mg) according to General Procedure. The crude product was purified by column chromatography (petroleum ether: ethyl acetate = 10:3) to afford the compound **3ag** as a yellow solid (m. p. 106-107°C) in 71% yield (126.5mg).

**R<sub>f</sub>**(petroleum ether/ethyl acetate = 10:3): 0.10; **<sup>1</sup>H NMR** (500 MHz, CDCl<sub>3</sub>) δ 8.34 (s, 1H), 7.88-7.83 (m, 3H), 7.74-7.70 (m, 1H), 7.64-7.55 (m, 4H), 7.19-7.11 (m, 9H), 7.01-6.98 (m, 1H), 6.88 (d,

$J = 7.7$  Hz, 1H), 5.85 (d,  $J = 8.5$  Hz, 1H), 4.18 (dd,  $J = 14.6, 3.3$  Hz, 1H), 3.47 (dd,  $J = 14.3, 8.8$  Hz, 1H), 3.24 (dd,  $J = 14.3, 4.8$  Hz, 1H), 2.95-2.87 (m, 1H), 2.37 (s, 3H), 2.31 (dd,  $J = 9.5, 4.7$  Hz, 1H), 1.88-1.77 (m, 1H), 1.62 (d,  $J = 13.5$  Hz, 1H);  $^{13}\text{C}$  NMR (126 MHz,  $\text{CDCl}_3$ )  $\delta$  143.35, 141.46, 141.32, 140.08, 138.77, 137.54, 136.14, 135.30, 132.13, 130.77, 130.25, 129.88, 129.65, 129.53, 129.44, 129.35, 129.21, 128.53, 128.49, 128.33, 127.99, 127.87, 127.72, 127.66, 127.38, 122.64, 62.87, 50.17, 34.35, 33.33, 21.55; HRMS (ESI) calcd for  $\text{C}_{35}\text{H}_{31}\text{NNaO}_4\text{S}_2[\text{M}+\text{Na}]^+$ : 616.1587, found: 616.1579.

**(Z)-4-(((2,3-dihydrobenzofuran-5-yl)sulfonyl)methyl)-6-phenyl-1-tosyl-1,2,3,4-tetrahydrobenzo[b]azocine(3ah)**

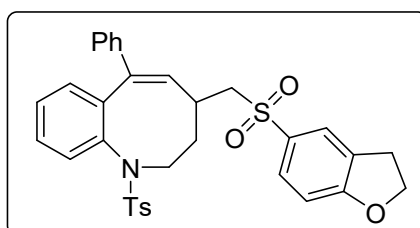

**1a** (0.30 mmol, 121.06 mg) was reacted with **2i** (0.39 mmol, 132.31 mg) according to General Procedure. The crude product was purified by column chromatography (petroleum ether: ethyl acetate = 10:3) to afford the compound **3ah** as a yellow solid (m. p. 101-102°C) in 69% yield (121.2 mg).

$R_f$  (petroleum ether/ethyl acetate = 5:2): 0.36;  $^1\text{H}$  NMR (500 MHz,  $\text{CDCl}_3$ )  $\delta$  7.61 (d,  $J = 8.1$  Hz, 2H), 7.54 (d,  $J = 8.6$  Hz, 2H), 7.34-7.16 (m, 9H), 7.12 (dd,  $J = 7.3, 1.5$  Hz, 1H), 6.94 (d,  $J = 7.5$  Hz, 1H), 6.75 (d,  $J = 8.2$  Hz, 1H), 5.85 (d,  $J = 8.5$  Hz, 1H), 4.62-5.2 (m, 2H), 4.20 (dd,  $J = 14.7, 3.2$  Hz, 1H), 3.37 (dd,  $J = 14.2, 9.0$  Hz, 1H), 3.12 (dd,  $J = 14.2, 4.7$  Hz, 2H), 3.05-2.90 (m, 2H), 2.38 (s, 3H), 2.33-2.26 (m, 1H), 1.85-1.77 (m, 1H), 1.60 (d,  $J = 13.6$  Hz, 1H);  $^{13}\text{C}$  NMR (126 MHz,  $\text{CDCl}_3$ )  $\delta$  164.69, 143.37, 141.60, 141.30, 140.27, 138.40, 137.54, 130.76, 130.72, 130.67, 129.84, 129.54, 129.28, 128.70, 128.65, 128.50, 128.41, 127.93, 127.65, 127.44, 125.38, 109.73, 72.41, 63.27, 50.18, 34.46, 33.33, 28.89, 21.55; HRMS (ESI) calcd for  $\text{C}_{33}\text{H}_{32}\text{O}_5\text{S}_2[\text{M}+\text{H}]^+$ : 586.1716, found: 586.1706.

**(Z)-6-phenyl-4-((thiophen-2-ylsulfonyl)methyl)-1-tosyl-1,2,3,4-tetrahydrobenzo[b]azocine(3ai)**



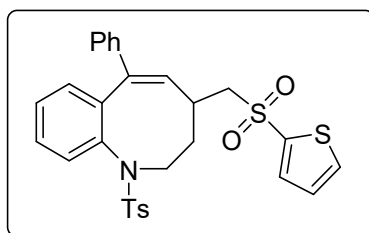

**1a** (0.30 mmol, 121.06 mg) was reacted with **2j** (0.39 mmol, 118.3 mg) according to General Procedure. The crude product was purified by column chromatography (petroleum ether: ethyl acetate = 5:2) to afford the compound **3ai** as a yellow solid (m. p. 101-102°C) in 85% yield (164.9 mg).

**R<sub>f</sub>** (petroleum ether/ethyl acetate = 5:2): 0.38; **<sup>1</sup>H NMR** (500 MHz, CDCl<sub>3</sub>) δ 7.62 (d, *J* = 8.1 Hz, 2H), 7.57 (d, *J* = 4.8 Hz, 1H), 7.50 (d, *J* = 3.5 Hz, 1H), 7.34-7.18 (m, 9H), 7.12 (dd, *J* = 7.0, 1.9 Hz, 1H), 7.01-6.97 (m, 1H), 6.94-6.91 (m, 1H), 5.94 (d, *J* = 8.5 Hz, 1H), 4.21 (dd, *J* = 14.7, 3.3 Hz, 1H), 3.47 (dd, *J* = 14.2, 8.4 Hz, 1H), 3.27 (dd, *J* = 14.2, 5.1 Hz, 1H), 2.99-2.90 (m, 1H), 2.39 (s, 3H), 2.36-2.30 (m, 1H), 1.90-1.79 (m, 1H), 1.64 (d, *J* = 13.6 Hz, 1H); **<sup>13</sup>C NMR** (126 MHz, CDCl<sub>3</sub>) δ 143.41, 141.53, 140.21, 140.18, 138.95, 137.53, 134.25, 134.20, 131.04, 130.06, 129.56, 129.31, 128.71, 128.54, 128.42, 128.01, 127.67, 127.52, 64.08, 50.23, 34.54, 33.14, 21.56; **HRMS** (ESI) calcd for C<sub>29</sub>H<sub>27</sub>NNaO<sub>4</sub>S<sub>3</sub>[M+Na]<sup>+</sup>: 572.0994, found: 572.0988.

**(Z)-4-((cyclopropylsulfonyl)methyl)-6-phenyl-1-tosyl-1,2,3,4-tetrahydrobenzo[b]azocine(3aj)**

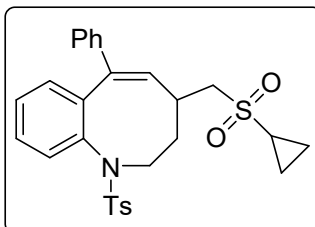

**1a** (0.30 mmol, 121.06 mg) was reacted with **2k** (0.39 mmol, 102.16 mg) according to General Procedure. The crude product was purified by column chromatography (petroleum ether: ethyl acetate = 5:2) to afford the compound **3aj** as a yellow solid (m. p. 173-174°C) in 62% yield (94.4 mg).

**R<sub>f</sub>** (petroleum ether/ethyl acetate = 5:2): 0.10; **<sup>1</sup>H NMR** (500 MHz, CDCl<sub>3</sub>) δ 7.64 (d, *J* = 8.0 Hz, 2H), 7.43-7.11 (m, 10H), 7.01-6.91 (m, 1H), 6.02 (d, *J* = 8.5 Hz, 1H), 4.24 (dd, *J* = 14.6, 3.1 Hz, 1H), 3.29 (dd, *J* = 13.9, 8.4 Hz, 1H), 3.12 (dd, *J* = 14.0, 5.5 Hz, 1H), 3.05-2.96 (m, 1H), 2.54 (dd, *J* = 15.8, 8.0 Hz, 1H), 2.39 (s, 3H), 2.25-2.20 (m, 1H), 1.91-1.81 (m, 1H), 1.74 (d, *J* = 12.2 Hz, 1H), 1.14-1.09 (m, 2H), 0.92-0.83 (m, 2H); **<sup>13</sup>C NMR** (126 MHz, CDCl<sub>3</sub>) δ 143.43, 141.64,

140.24, 138.66, 137.56, 130.87, 130.64, 129.59, 129.37, 128.66, 128.60, 128.08, 127.66, 127.51, 60.29, 50.31, 33.77, 33.09, 30.04, 21.57, 4.83, 4.60; **HRMS** (ESI) calcd for  $C_{28}H_{29}NNaO_4S_2[M+Na]^+$ : 530.1430, found: 530.1421.

**(Z)-4-((methylsulfonyl)methyl)-6-phenyl-1-tosyl-1,2,3,4-tetrahydrobenzo[b]azocine(3ak)**

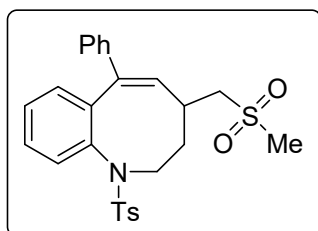

**1a** (0.30 mmol, 121.06 mg) was reacted with **21** (0.39 mmol, 92.02 mg) according to General Procedure. The crude product was purified by column chromatography (petroleum ether: ethyl acetate = 10:3) to afford the compound **3ak** as a yellow solid (m. p. 173-174°C) in 57% yield (82.4 mg).

$R_f$ (petroleum ether/ethyl acetate = 5:2): 0.10;  $^1H$  NMR (500 MHz,  $CDCl_3$ )  $\delta$  7.65 (d,  $J$  = 8.1 Hz, 2H), 7.39 (d,  $J$  = 7.0 Hz, 2H), 7.31-7.22 (m, 7H), 7.15 (dd,  $J$  = 6.3, 2.8 Hz, 1H), 6.94 (dd,  $J$  = 5.6, 3.3 Hz, 1H), 5.99 (d,  $J$  = 8.6 Hz, 1H), 4.25 (dd,  $J$  = 14.7, 3.1 Hz, 1H), 3.28 (dd,  $J$  = 13.9, 8.2 Hz, 1H), 3.10 (dd,  $J$  = 13.9, 5.6 Hz, 1H), 3.05-2.97 (m, 1H), 2.79 (s, 3H), 2.54-2.47 (m, 1H), 2.41 (s, 3H), 1.94-1.82 (m, 1H), 1.73 (d,  $J$  = 13.7 Hz, 1H);  $^{13}C$  NMR (126 MHz,  $CDCl_3$ )  $\delta$  143.43, 141.54, 141.42, 140.23, 139.19, 137.54, 130.81, 130.00, 129.59, 129.47, 128.73, 128.63, 128.61, 128.11, 127.66, 61.06, 50.27, 41.72, 33.91, 33.09, 21.56; **HRMS** (ESI) calcd for  $C_{26}H_{27}NNaO_4S_2[M+Na]^+$ : 504.1274, found: 504.1266.

**(Z)-6-phenyl-4-((phenylsulfonyl)methyl)-1,2,3,4-tetrahydrobenzo[b]azocine (4)**

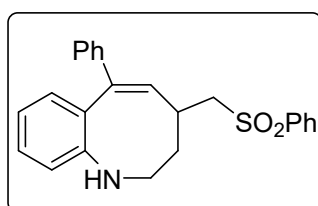

$R_f$ (petroleum ether/ethyl acetate = 5:2): 0.10;  $^1H$  NMR (500 MHz,  $CDCl_3$ )  $\delta$  7.72 (d,  $J$  = 7.4 Hz, 2H), 7.52 (t,  $J$  = 7.5 Hz, 1H), 7.36 (t,  $J$  = 7.8 Hz, 2H), 7.25 (dd,  $J$  = 9.3, 3.2 Hz, 3H), 7.17 (dd,  $J$  = 7.6, 1.7 Hz, 2H), 7.03-6.98 (m, 1H), 6.68 (dd,  $J$  = 7.8, 1.3 Hz, 1H), 6.57 (t,  $J$  = 7.3 Hz, 1H), 6.44 (d,  $J$  = 8.2 Hz, 1H), 5.28 (d,  $J$  = 9.4 Hz, 1H), 3.92-3.83 (m, 1H), 3.32 (dd,  $J$  = 14.3, 10.2 Hz, 1H), 3.20 (dd,  $J$  = 14.3, 3.3 Hz, 1H), 3.14-3.04 (m, 2H), 1.78-1.70 (m, 1H), 1.26 (s, 1H), 1.18 (t,  $J$  =

12.4 Hz, 1H);  $^{13}\text{C}$  NMR (126 MHz,  $\text{CDCl}_3$ )  $\delta$  147.14, 143.83, 142.93, 138.49, 133.59, 133.51, 129.10, 128.73, 128.48, 128.19, 128.09, 128.05, 127.12, 121.14, 117.46, 116.64, 61.94, 40.91, 33.13, 31.10; HRMS (ESI) calcd for  $\text{C}_{24}\text{H}_{24}\text{NO}_2\text{S}[\text{M}+\text{H}]^+$ : 390.1522, found: 390.1515.

**9b-phenyl-2-((phenylsulfonyl)methyl)-5-tosyl-1a,2,3,4,5,9b-hexahydrobenzo[*b*]oxireno[2,3-*d*]azocine (5)**

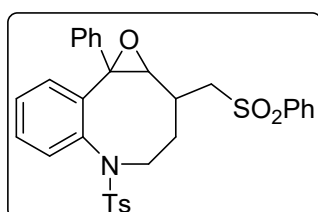

$R_f$  (petroleum ether/ethyl acetate = 5:2): 0.10;  $^1\text{H}$  NMR (500 MHz,  $\text{CDCl}_3$ )  $\delta$  7.75 (dd,  $J = 18.3$ , 7.9 Hz, 2H), 7.57 (t,  $J = 7.5$  Hz, 1H), 7.47-7.39 (m, 7H), 7.28 (dd,  $J = 8.9$ , 3.7 Hz, 5H), 7.25-7.22 (m, 1H), 7.16 (d,  $J = 8.1$  Hz, 2H), 4.11-4.03 (m, 1H), 3.40-3.33 (m, 1H), 3.25 (d,  $J = 8.6$  Hz, 1H), 3.14-3.01 (m, 2H), 2.39 (s, 3H), 2.13 (d,  $J = 13.8$  Hz, 1H), 1.71-1.57 (m, 2H).;  $^{13}\text{C}$  NMR (126 MHz,  $\text{CDCl}_3$ )  $\delta$  143.92, 141.24, 139.29, 138.79, 137.62, 136.52, 133.78, 131.85, 130.30, 129.63, 129.49, 129.31, 128.50, 128.26, 128.20, 128.00, 127.71, 127.59, 68.92, 65.56, 58.37, 53.60, 36.29, 30.40, 21.55; HRMS (ESI) calcd for  $\text{C}_{31}\text{H}_{29}\text{NNaO}_5\text{S}_2[\text{M}+\text{Na}]^+$ : 582.1379, found: 582.1379.

## 7. DFT Calculations

All density functional theory (DFT) calculations were carried out with the Gaussian 16 programs<sup>1</sup> by using the hybrid density functional M06-2X<sup>2</sup>, in combination with the Def2-SVP<sup>3</sup>

basis set for all atoms. All geometries have been fully optimized with no constraints of freedom. Vibrational analyses at the same theoretical level were performed to confirm each stationary point to be either a local minimum or a transition state (TS). The transition states were further verified by intrinsic reaction coordinate (IRC)<sup>4</sup> calculations. The solvent effect of dichloroethane ( $\epsilon = 10.125$ ) was simulated by performing the self-consistent reaction field (SCRF) of the SMD<sup>5</sup> method of Truhlar and Cramer at the same computational level. The energy unit of all structures was kcal/mol. All 3D structures were generated using CYLview.<sup>6</sup>

#### References:

- 1 M. J. Frisch, G. W. Trucks, H. B. Schlegel, G. E. Scuseria, M. A. Robb, J. R. Cheeseman, G. Scalmani, V. Barone, G. A. Petersson, H. Nakatsuji, X. Li, M. Caricato, A. V. Marenich, J. Bloino, B. G. Janesko, R. Gomperts, B. Mennucci, H. P. Hratchian, J. V. Ortiz, A. F. Izmaylov, J. L. Sonnenberg, D. Williams-Young, F. Ding, F. Lipparini, F. Egidi, J. Goings, B. Peng, A. Petrone, T. Henderson, D. Ranasinghe, V. G. Zakrzewski, J. Gao, N. Rega, G. Zheng, W. Liang, M. Hada, M. Ehara, K. Toyota, R. Fukuda, J. Hasegawa, M. Ishida, T. Nakajima, Y. Honda, O. Kitao, H. Nakai, T. Vreven, K. Throssell, J. A. Montgomery, Jr., J. E. Peralta, F. Ogliaro, M. Bearpark, J. J. Heyd, E. Brothers, K. N. Kudin, V. N. Staroverov, T. A. Keith, R. Kobayashi, J. Normand, K. Raghavachari, A. Rendell, J. C. Burant, S. S. Iyengar, J. Tomasi, M. Cossi, J. M. Millam, M. Klene, C. Adamo, R. Cammi, J. W. Ochterski, R. L. Martin, K. Morokuma, O. Farkas, J. B. Foresman, D. J. Fox, *Gaussian 16, Revision A.03*. 2016, Wallingford CT: Gaussian, Inc.
- 2 Y. Zhao and D. G. Truhlar, *Theor. Chem. Acc.*, 2008, **120**, 215-241.
- 3 F. Weigend and R. Ahlrichs, *Phys. Chem. Chem. Phys.*, 2005, **7**, 3297-305.
- 4 (a) C. Gonzalez and H. B. Schlegel, *J. Phys. Chem.*, 1990, **94**, 5523-5527; (b) C. Gonzalez and H. B. Schlegel, *J. Chem. Phys.*, 1989, **90**, 2154-2161.
- 5 A. V. Marenich, C. J. Cramer and D. G. Truhlar, *J. Phys. Chem. B*, 2009, **113**, 6378-6396.
- 6 C. Y. Legault, *CYLview*, 1.0b;. 2009, Université de Sherbrooke: Sherbrooke, Canada, (<http://www.cylview.org>).

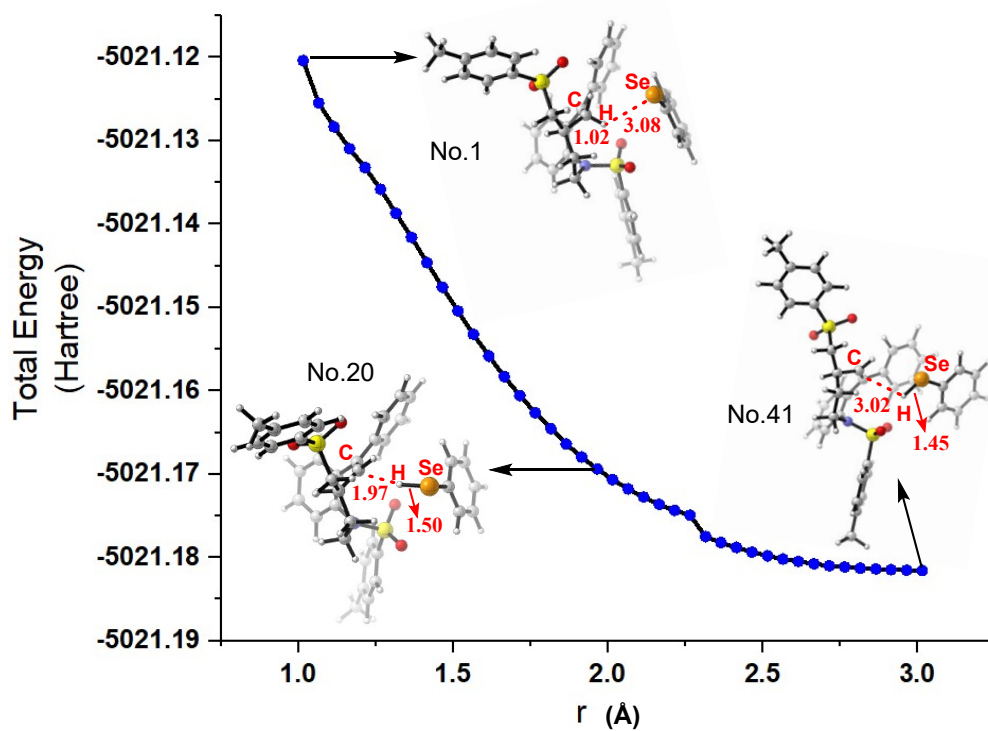

**Figure S1.** The energy profile (total energy) along the distance of C–H within the INT-3 from a relaxed scan (41 points with 0.05 angstrom per step) in the deprotonation process using the PhSe<sup>-</sup>.

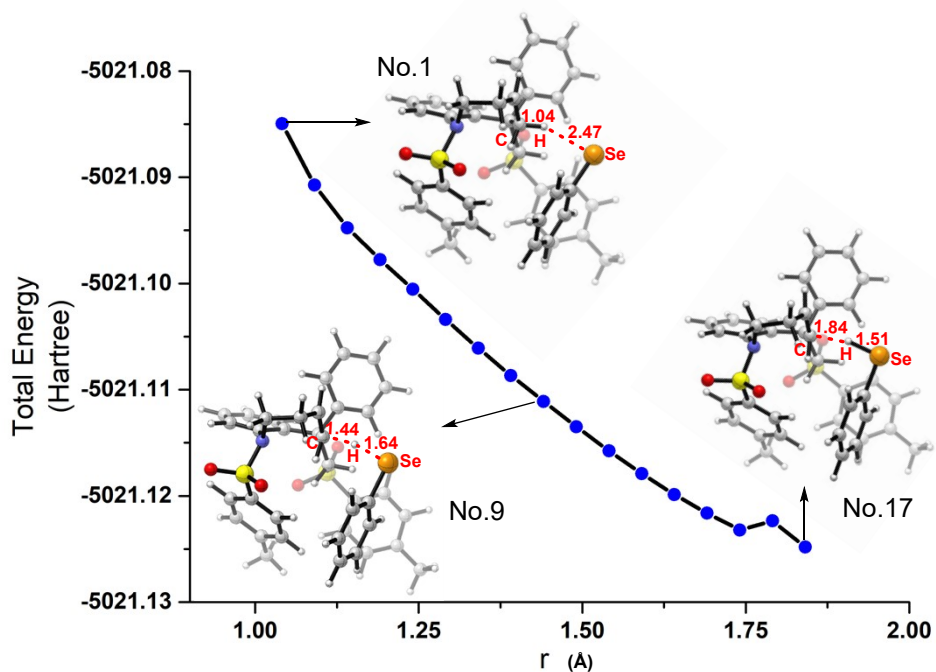

**Figure S2.** The energy profile (total energy) along the distance of C–H within the INT-3' from a relaxed scan (17 points with 0.05 angstrom per step) in the deprotonation process using the PhSe<sup>-</sup>.

From the Figure S1 and S2, we can clearly see that the deprotonation process using the PhSe<sup>-</sup> is

barrierless.

**Cartesian Coordinates and Thermochemical Data (Energies in Hartree)**

**1a**

Number of imaginary frequencies: 0

|   |             |             |             |
|---|-------------|-------------|-------------|
| C | -1.78685100 | -2.69615800 | 2.44896700  |
| C | -0.42848500 | -2.42518700 | 2.62107600  |
| C | 0.22657500  | -1.59534000 | 1.71605600  |
| C | -0.45716500 | -1.05812400 | 0.62033200  |
| C | -1.82367200 | -1.33688600 | 0.42857600  |
| C | -2.47492200 | -2.14562400 | 1.37125100  |
| C | -2.58567900 | -0.80035500 | -0.73896600 |
| C | -2.16695500 | -1.04008400 | -1.99053000 |
| N | 0.21773200  | -0.16437700 | -0.26378600 |
| C | -0.03288300 | 1.27180000  | -0.16425900 |
| C | 0.57132500  | 1.88957000  | 1.09858400  |
| C | 0.29209900  | 3.36151000  | 1.17301300  |
| C | 1.22629400  | 4.31170100  | 1.13224300  |
| C | -3.80924500 | -0.00027600 | -0.44873200 |
| C | -3.88943500 | 0.78207700  | 0.71471400  |
| C | -5.01345700 | 1.56570500  | 0.97246300  |
| C | -6.08451100 | 1.57180200  | 0.07858900  |
| C | -6.02332600 | 0.78665600  | -1.07397700 |
| C | -4.89841300 | 0.00667000  | -1.33422100 |
| C | 2.89430500  | -0.36907900 | -0.81252000 |
| C | 3.47330200  | 0.86190100  | -1.11251900 |
| C | 4.72587200  | 1.16373400  | -0.58003700 |
| C | 5.40526000  | 0.24922000  | 0.23435600  |
| C | 4.80207400  | -0.98959900 | 0.50293600  |
| C | 3.55094700  | -1.30712200 | -0.01444400 |

|   |             |             |             |
|---|-------------|-------------|-------------|
| C | 6.76279500  | 0.56701500  | 0.79671900  |
| S | 1.26257600  | -0.73196400 | -1.41274300 |
| O | 1.06907600  | 0.05475900  | -2.62311100 |
| O | 1.09739300  | -2.17934200 | -1.44482300 |
| H | -2.31303900 | -3.33695500 | 3.15833900  |
| H | 0.11600600  | -2.84610200 | 3.46760800  |
| H | 1.28031000  | -1.34380700 | 1.85112300  |
| H | -3.53908900 | -2.35428800 | 1.24007600  |
| H | -2.69352500 | -0.63137800 | -2.85612300 |
| H | -1.28483700 | -1.65598900 | -2.17772700 |
| H | 0.37788700  | 1.75236200  | -1.06300300 |
| H | -1.12324700 | 1.43732100  | -0.19298400 |
| H | 1.65777300  | 1.70634500  | 1.11156500  |
| H | 0.13706100  | 1.38412100  | 1.97825800  |
| H | -0.76390500 | 3.65058900  | 1.24320000  |
| H | 0.96537300  | 5.37181600  | 1.17676400  |
| H | 2.28876800  | 4.05783200  | 1.05726400  |
| H | -3.05766100 | 0.78283200  | 1.42323900  |
| H | -5.05209300 | 2.17337300  | 1.87829500  |
| H | -6.96757300 | 2.17952100  | 0.28329400  |
| H | -6.86267600 | 0.77309300  | -1.77165800 |
| H | -4.87099800 | -0.62140100 | -2.22666600 |
| H | 2.95405400  | 1.57129900  | -1.75928800 |
| H | 5.18808300  | 2.12646900  | -0.80756200 |
| H | 5.32695800  | -1.71787400 | 1.12518500  |
| H | 3.08697100  | -2.27414500 | 0.18712600  |
| H | 6.79006400  | 0.38409500  | 1.88059100  |
| H | 7.03770100  | 1.61294000  | 0.61021000  |
| H | 7.52944600  | -0.07651200 | 0.33871000  |

**SMD-M06-2X/Def2-SVP**

Electronic Energy (0K) = -1569.528467

Electronic Energy (0K) + ZPE = -1569.086209

Enthalpy (298K) = -1569.058137

Free Energy (298K) = -1569.148296

### TS•

Number of imaginary frequencies: 0

|   |             |             |             |
|---|-------------|-------------|-------------|
| C | -0.36268500 | 0.00115000  | -0.10071800 |
| C | 0.30514000  | 1.22205500  | -0.08096000 |
| C | 1.69626600  | 1.21124200  | -0.01347900 |
| C | 2.41050900  | 0.00611200  | 0.01820300  |
| C | 1.69903200  | -1.20367100 | -0.01694200 |
| C | 0.31053200  | -1.21950500 | -0.08362900 |
| C | 3.91071600  | -0.00229500 | 0.10492900  |
| S | -2.14735200 | -0.00207700 | -0.23798400 |
| O | -2.64930500 | 1.28104900  | 0.28639000  |
| O | -2.64463400 | -1.28474700 | 0.29213400  |
| H | -0.25253400 | 2.15941000  | -0.10402300 |
| H | 2.23860000  | 2.15837500  | 0.01439300  |
| H | 2.24540600  | -2.14903900 | 0.00866900  |
| H | -0.24463600 | -2.15832200 | -0.10818500 |
| H | 4.32695400  | 0.99806800  | -0.06883700 |
| H | 4.23574100  | -0.33844500 | 1.10182100  |
| H | 4.34255500  | -0.69775800 | -0.62870400 |

### SMD-UM06-2X/Def2-SVP

Electronic Energy (0K) = -818.8804811

Electronic Energy (0K) + ZPE = -818.753395

Enthalpy (298K) = -818.743168

Free Energy (298K) = -818.789323



**TS<sub>1</sub>**

Number of imaginary frequencies: 1

|   |             |             |             |
|---|-------------|-------------|-------------|
| C | -5.46267800 | 0.23331200  | -1.82900200 |
| C | -4.65077000 | 1.34756300  | -2.04663900 |
| C | -3.45566300 | 1.47465600  | -1.34460000 |
| C | -3.07994400 | 0.51270000  | -0.40065700 |
| C | -3.89954500 | -0.60646900 | -0.16029200 |
| C | -5.08057900 | -0.73585900 | -0.90538900 |
| C | -3.55031800 | -1.64309500 | 0.85759400  |
| C | -3.32748600 | -1.29485700 | 2.13362900  |
| N | -1.82736200 | 0.63592100  | 0.27087900  |
| C | -0.72491300 | -0.24564400 | -0.10179000 |
| C | -0.19900900 | 0.04669400  | -1.51512300 |
| C | 0.83706900  | -0.94407800 | -1.92397200 |
| C | 2.15877100  | -0.62702500 | -2.10997900 |
| C | -3.45968000 | -3.05603000 | 0.39195400  |
| C | -3.03600800 | -3.34968800 | -0.91425000 |
| C | -2.90470200 | -4.66994600 | -1.34277300 |
| C | -3.20745800 | -5.72168800 | -0.47759400 |
| C | -3.64445800 | -5.44258200 | 0.81842800  |
| C | -3.77175600 | -4.12335900 | 1.24838300  |
| C | -0.84467000 | 3.15389200  | 0.77130500  |
| C | 0.53589500  | 3.11800500  | 0.56433100  |
| C | 1.14652200  | 4.20982000  | -0.04326100 |
| C | 0.40434800  | 5.33635400  | -0.43272700 |
| C | -0.97590100 | 5.34369700  | -0.19832600 |
| C | -1.61019800 | 4.25641400  | 0.40213400  |
| C | 1.09179900  | 6.51002600  | -1.07344700 |
| S | -1.63902300 | 1.73900500  | 1.49178100  |

|   |             |             |             |
|---|-------------|-------------|-------------|
| O | -0.71280700 | 1.16547700  | 2.45684800  |
| O | -2.97884500 | 2.13756900  | 1.90455900  |
| H | -6.39631900 | 0.11755800  | -2.38179800 |
| H | -4.93912000 | 2.10806000  | -2.77378500 |
| H | -2.79017900 | 2.32155200  | -1.52488500 |
| H | -5.71497100 | -1.60924200 | -0.73816300 |
| H | -3.04253200 | -2.03617400 | 2.88388100  |
| H | -3.42464200 | -0.25580600 | 2.45558500  |
| H | 0.07488400  | -0.13352400 | 0.64252000  |
| H | -1.06951000 | -1.29111400 | -0.03278400 |
| H | 0.20558900  | 1.07053500  | -1.55497300 |
| H | -1.05162500 | -0.00574700 | -2.21562800 |
| H | 0.53506900  | -1.99603300 | -1.95784800 |
| H | 2.85374000  | -1.38339500 | -2.48630000 |
| H | 2.45552400  | 0.42013700  | -2.23037800 |
| H | -2.79848000 | -2.53316400 | -1.60031200 |
| H | -2.56556100 | -4.87704400 | -2.35936300 |
| H | -3.11122600 | -6.75531100 | -0.81434700 |
| H | -3.89765000 | -6.25852400 | 1.49776000  |
| H | -4.13477700 | -3.91527800 | 2.25659500  |
| H | 1.12811900  | 2.25115800  | 0.86733500  |
| H | 2.22563500  | 4.19127900  | -0.21372400 |
| H | -1.56497400 | 6.21659200  | -0.48693900 |
| H | -2.68503100 | 4.26346200  | 0.58948800  |
| H | 0.36914000  | 7.27377900  | -1.38784900 |
| H | 1.66968700  | 6.19173500  | -1.95345600 |
| H | 1.80001900  | 6.97389200  | -0.37029100 |
| C | 4.68082800  | -0.99887800 | 0.10572000  |
| C | 5.61003200  | 0.03037000  | -0.02675100 |
| C | 6.96284100  | -0.29753000 | -0.08682600 |

|   |            |             |             |
|---|------------|-------------|-------------|
| C | 7.38793700 | -1.63125300 | -0.02803800 |
| C | 6.42199100 | -2.64303100 | 0.09542500  |
| C | 5.06702200 | -2.33922600 | 0.15827000  |
| C | 8.84819900 | -1.98368700 | -0.08011000 |
| S | 2.94498500 | -0.60908800 | 0.09701600  |
| O | 2.77850300 | 0.78771500  | 0.54506600  |
| O | 2.21805500 | -1.67878000 | 0.79833100  |
| H | 5.27762500 | 1.06888800  | -0.06585100 |
| H | 7.70454300 | 0.49840400  | -0.17975400 |
| H | 6.74170100 | -3.68622600 | 0.14558500  |
| H | 4.31558500 | -3.12370300 | 0.26210800  |
| H | 9.46137600 | -1.10946000 | -0.33310500 |
| H | 9.18532200 | -2.36841800 | 0.89469900  |
| H | 9.03481400 | -2.77228100 | -0.82312500 |

#### **SMD-UM06-2X/Def2-SVP**

Electronic Energy (0K) = -2388.4118704

Electronic Energy (0K) + ZPE = -2387.841521

Enthalpy (298K) = -2387.803400

Free Energy (298K) = -2387.919002

#### **Int-1**

Number of imaginary frequencies: 0

|   |             |             |             |
|---|-------------|-------------|-------------|
| C | -5.21158800 | 0.79252100  | -2.04347600 |
| C | -4.23018300 | 1.77061900  | -2.21009400 |
| C | -3.08493600 | 1.73626200  | -1.41989800 |
| C | -2.92629700 | 0.75132900  | -0.43863300 |
| C | -3.91709000 | -0.23133400 | -0.25091200 |
| C | -5.04525300 | -0.20218300 | -1.08364600 |
| C | -3.80309200 | -1.28853700 | 0.79916300  |
| C | -3.61785800 | -0.95498500 | 2.08513200  |

|   |             |             |             |
|---|-------------|-------------|-------------|
| N | -1.72245100 | 0.70753800  | 0.32625600  |
| C | -0.74033300 | -0.33926700 | 0.05153000  |
| C | -0.09000600 | -0.19199900 | -1.33382100 |
| C | 0.77881500  | -1.35682000 | -1.66083300 |
| C | 2.25228200  | -1.27464800 | -1.63346900 |
| C | -3.90003700 | -2.70795200 | 0.35460800  |
| C | -3.43280500 | -3.09111300 | -0.91296300 |
| C | -3.47641800 | -4.42487400 | -1.31690200 |
| C | -4.00014600 | -5.39888100 | -0.46637300 |
| C | -4.48226100 | -5.02816200 | 0.79006200  |
| C | -4.43507900 | -3.69603200 | 1.19569800  |
| C | -0.54276700 | 3.15842400  | 0.77178800  |
| C | 0.82075500  | 2.97999500  | 0.52800500  |
| C | 1.52651300  | 4.00783800  | -0.08780300 |
| C | 0.89633300  | 5.20903200  | -0.45159700 |
| C | -0.46926900 | 5.35768800  | -0.18250300 |
| C | -1.19786900 | 4.33757500  | 0.42912200  |
| C | 1.68655000  | 6.31250100  | -1.09861600 |
| S | -1.45896600 | 1.83014000  | 1.51413200  |
| O | -0.59881900 | 1.20707400  | 2.50869000  |
| O | -2.76416900 | 2.35613700  | 1.89546100  |
| H | -6.10829700 | 0.80196000  | -2.66516400 |
| H | -4.34739200 | 2.54856700  | -2.96602900 |
| H | -2.28966000 | 2.47140800  | -1.56025100 |
| H | -5.81169000 | -0.97029400 | -0.95763300 |
| H | -3.50478100 | -1.71826000 | 2.85865600  |
| H | -3.57041400 | 0.09251900  | 2.39032200  |
| H | 0.02464600  | -0.31054200 | 0.83863100  |
| H | -1.24438600 | -1.31731800 | 0.12666500  |
| H | 0.48460400  | 0.74715900  | -1.36717000 |

|   |             |             |             |
|---|-------------|-------------|-------------|
| H | -0.89900500 | -0.11612900 | -2.08286500 |
| H | 0.32194700  | -2.34749700 | -1.71459500 |
| H | 2.74219600  | -2.17761800 | -2.02158000 |
| H | 2.65818300  | -0.37696500 | -2.12608500 |
| H | -3.02277000 | -2.33589600 | -1.58775800 |
| H | -3.10006900 | -4.70372100 | -2.30279600 |
| H | -4.04033200 | -6.44209900 | -0.78427100 |
| H | -4.90750200 | -5.78054600 | 1.45676300  |
| H | -4.83402500 | -3.41272400 | 2.17150100  |
| H | 1.32141100  | 2.04922100  | 0.80710000  |
| H | 2.59311900  | 3.87977600  | -0.28732500 |
| H | -0.97232000 | 6.28835200  | -0.45303300 |
| H | -2.26152400 | 4.45325000  | 0.64209800  |
| H | 1.03064900  | 7.11582200  | -1.45779100 |
| H | 2.27170300  | 5.93046300  | -1.94750100 |
| H | 2.39953300  | 6.74730800  | -0.38136700 |
| C | 4.57342300  | -1.33523900 | 0.05108500  |
| C | 5.38801100  | -0.22158200 | -0.13613000 |
| C | 6.76796500  | -0.40503900 | -0.19907800 |
| C | 7.33369000  | -1.68033500 | -0.07536700 |
| C | 6.48325600  | -2.78110200 | 0.11615300  |
| C | 5.10412100  | -2.61927400 | 0.18135600  |
| C | 8.82289700  | -1.87767200 | -0.12815400 |
| S | 2.81219500  | -1.12405100 | 0.10066300  |
| O | 2.52840300  | 0.25064500  | 0.53416300  |
| O | 2.22599500  | -2.23587000 | 0.85122200  |
| H | 4.94775300  | 0.77346000  | -0.21973500 |
| H | 7.41932100  | 0.45940700  | -0.34207800 |
| H | 6.91378000  | -3.77939200 | 0.22114900  |
| H | 4.44162400  | -3.47141000 | 0.34284100  |

|   |            |             |             |
|---|------------|-------------|-------------|
| H | 9.34028700 | -0.94828100 | -0.39791300 |
| H | 9.20114100 | -2.21090300 | 0.85030600  |
| H | 9.08854600 | -2.65369000 | -0.86050000 |

**SMD-UM06-2X/Def2-SVP**

Electronic Energy (0K) = -2388.4270668

Electronic Energy (0K) + ZPE = -2387.854749

Enthalpy (298K) = -2387.816910

Free Energy (298K) = -2387.930159

**TS<sub>2</sub>**

Number of imaginary frequencies: 1

|   |             |             |             |
|---|-------------|-------------|-------------|
| S | 2.93357400  | -1.30979600 | 0.95014600  |
| S | -3.53843800 | -0.10788900 | 0.15633400  |
| O | 2.91478600  | -0.50909900 | 2.16624800  |
| O | 2.34500000  | -2.64329100 | 0.93438000  |
| N | 2.14421100  | -0.44074100 | -0.22260600 |
| C | 2.44713100  | 0.95575300  | -0.32988000 |
| C | 1.54653300  | 1.95034200  | 0.12300400  |
| C | 0.18190300  | 1.68366600  | 0.63566400  |
| C | -0.87334400 | 2.70019400  | 0.36074700  |
| C | -0.20820700 | 0.51465300  | 1.22897700  |
| H | -1.21642100 | 0.44625300  | 1.64015700  |
| C | 3.65982900  | 1.31541100  | -0.93087600 |
| H | 4.29938400  | 0.52422900  | -1.32617000 |
| C | 1.97857700  | 3.28892800  | 0.01968000  |
| H | 1.32003800  | 4.07789500  | 0.38501300  |
| C | -0.97320900 | -0.75117500 | -0.62611000 |
| H | -1.05783800 | 0.11097200  | -1.29579200 |
| C | 0.10516700  | -1.74372800 | -0.92782400 |
| H | -0.22209100 | -2.36224000 | -1.78808900 |

|   |             |             |             |
|---|-------------|-------------|-------------|
| H | 0.23336900  | -2.44119800 | -0.08713000 |
| C | 4.62965600  | -1.47570200 | 0.45476700  |
| C | -1.84287500 | 3.00544000  | 1.32698400  |
| H | -1.77967700 | 2.54073400  | 2.31234000  |
| C | 1.46148400  | -1.15603600 | -1.31024600 |
| H | 1.34120700  | -0.42647200 | -2.12366400 |
| H | 2.11010000  | -1.95976000 | -1.69361900 |
| C | 5.58405600  | -0.60385100 | 0.97353100  |
| H | 5.29315400  | 0.14840700  | 1.70802400  |
| C | -0.97533700 | 3.31680100  | -0.89836400 |
| H | -0.23684700 | 3.08852900  | -1.67053600 |
| C | 4.05259900  | 2.64655900  | -1.02909500 |
| O | -3.46924100 | 0.90847500  | -0.89475300 |
| C | -2.87850200 | 3.89473000  | 1.04715800  |
| H | -3.61893400 | 4.11966200  | 1.81729300  |
| C | 3.20886300  | 3.63638100  | -0.52600000 |
| H | 3.50105600  | 4.68683600  | -0.57173700 |
| C | -2.27679800 | -1.34890000 | -0.20303200 |
| H | -2.71261300 | -1.95968900 | -1.01626800 |
| H | -2.19791600 | -1.98389800 | 0.69309700  |
| C | 4.96961300  | -2.45585000 | -0.47957600 |
| H | 4.21278800  | -3.14822000 | -0.85208400 |
| C | 6.90150300  | -0.70939200 | 0.53292700  |
| H | 7.65711700  | -0.02996700 | 0.93248600  |
| C | -2.96886200 | 4.49656700  | -0.20732300 |
| H | -3.78018400 | 5.19318500  | -0.42660700 |
| C | -7.46954300 | -2.38021500 | -0.32696800 |
| C | -2.01223200 | 4.20250400  | -1.18059600 |
| H | -2.07681000 | 4.66223100  | -2.16875500 |
| C | -5.07225300 | -0.99242800 | -0.03056000 |

|   |             |             |             |
|---|-------------|-------------|-------------|
| C | -5.70213800 | -1.00175500 | -1.27196700 |
| H | -5.26340900 | -0.46087400 | -2.11216500 |
| C | -6.90044200 | -1.69941700 | -1.41086000 |
| H | -7.40730700 | -1.71131000 | -2.37783900 |
| C | 7.27248400  | -1.67175300 | -0.41519600 |
| C | 6.28900100  | -2.54178800 | -0.91133500 |
| H | 6.56699200  | -3.30403700 | -1.64244900 |
| O | -3.44153600 | 0.28989700  | 1.56535400  |
| C | -8.76354500 | -3.13162600 | -0.47298400 |
| H | -9.52791500 | -2.72170400 | 0.20389400  |
| H | -9.14459500 | -3.07564300 | -1.50053600 |
| H | -8.62960300 | -4.19090900 | -0.20801600 |
| C | 8.69859900  | -1.79816900 | -0.87357200 |
| H | 9.18271800  | -2.65757900 | -0.38384300 |
| H | 8.75113200  | -1.96820900 | -1.95794500 |
| H | 9.27817500  | -0.89917200 | -0.62724300 |
| C | -6.81217300 | -2.34450400 | 0.91271000  |
| H | -7.25159000 | -2.86361900 | 1.76744600  |
| C | -5.61660400 | -1.65186500 | 1.07134900  |
| H | -5.11276300 | -1.60944600 | 2.03836500  |
| H | 5.00599700  | 2.90471000  | -1.49218200 |
| H | 0.51397600  | -0.22804800 | 1.55849600  |

### SMD-UM06-2X/Def2-SVP

Electronic Energy (0K) = -2388.4102725

Electronic Energy (0K) + ZPE = -2387.837462

Enthalpy (298K) = -2387.801081

Free Energy (298K) = -2387.909096

### INT-2

Number of imaginary frequencies: 0



|   |             |             |             |
|---|-------------|-------------|-------------|
| S | -2.96492100 | -0.28883300 | -1.20239400 |
| S | 3.52390800  | 0.00784300  | -0.30904500 |
| O | -3.00394800 | 1.16304400  | -1.10843100 |
| O | -2.58615000 | -0.94320400 | -2.44927000 |
| N | -1.91096800 | -0.83171200 | -0.05244400 |
| C | -1.72462300 | -0.07663200 | 1.14264500  |
| C | -0.84445900 | 1.03323900  | 1.15389400  |
| C | -0.04084200 | 1.42620700  | 0.00387800  |
| C | 0.20794000  | 2.84982700  | -0.22986600 |
| C | 0.47794700  | 0.42765100  | -0.99867700 |
| H | 1.30438100  | 0.90314300  | -1.54429000 |
| C | -2.43466800 | -0.45074500 | 2.28661300  |
| H | -3.10463200 | -1.31148800 | 2.22416900  |
| C | -0.73944600 | 1.74744200  | 2.37101100  |
| H | -0.05802800 | 2.59818800  | 2.42017000  |
| C | 0.93476400  | -0.95303700 | -0.45085600 |
| H | 0.91117100  | -0.92275200 | 0.65029000  |
| C | 0.03807900  | -2.10421800 | -0.93231300 |
| H | 0.54264900  | -3.07075400 | -0.77810800 |
| H | -0.13507000 | -1.99382700 | -2.01418500 |
| C | -4.56216000 | -0.90108300 | -0.73082700 |
| C | -0.79769200 | 3.80243400  | 0.04990200  |
| H | -1.76026300 | 3.45781900  | 0.43185100  |
| C | -1.29643500 | -2.15489600 | -0.19727700 |
| H | -1.15285100 | -2.54174700 | 0.82173600  |
| H | -1.99596200 | -2.83414100 | -0.70637000 |
| C | -5.32605200 | -0.16848500 | 0.18110400  |
| H | -4.96539200 | 0.79299200  | 0.55043700  |
| C | 1.42718400  | 3.32019700  | -0.76303900 |
| H | 2.23962500  | 2.62035200  | -0.96475600 |

|   |             |             |             |
|---|-------------|-------------|-------------|
| C | -2.29984400 | 0.26432800  | 3.47338400  |
| O | 3.04077000  | 0.53701200  | 0.97069000  |
| C | -0.59365900 | 5.15699600  | -0.19037300 |
| H | -1.39417900 | 5.86842300  | 0.02145000  |
| C | -1.44738300 | 1.37245100  | 3.50510400  |
| H | -1.32485000 | 1.94237400  | 4.42778800  |
| C | 2.37674500  | -1.28093600 | -0.84020200 |
| H | 2.71231900  | -2.20645800 | -0.35129800 |
| H | 2.52018200  | -1.37445200 | -1.92713000 |
| C | -5.00947000 | -2.11748300 | -1.24123300 |
| H | -4.40790800 | -2.65866900 | -1.97317900 |
| C | -6.55097000 | -0.68080600 | 0.59297400  |
| H | -7.15871700 | -0.11523000 | 1.30286800  |
| C | 0.62275400  | 5.60538900  | -0.71137300 |
| H | 0.78397700  | 6.66850500  | -0.89818500 |
| C | 7.46767600  | -2.16167000 | 0.43747100  |
| C | 1.62873200  | 4.67909000  | -0.99257300 |
| H | 2.58730300  | 5.01796700  | -1.39030400 |
| C | 5.06188500  | -0.83557400 | -0.01832700 |
| C | 5.32704200  | -1.34305100 | 1.25396300  |
| H | 4.60306400  | -1.20826000 | 2.05937600  |
| C | 6.53011200  | -2.00469400 | 1.47108400  |
| H | 6.75429400  | -2.40350900 | 2.46295500  |
| C | -7.02558200 | -1.90891100 | 0.10495700  |
| C | -6.24177300 | -2.61284500 | -0.81695300 |
| H | -6.60470500 | -3.56230400 | -1.21561000 |
| O | 3.74040200  | 0.93794700  | -1.42662400 |
| C | 8.76323600  | -2.87836200 | 0.69757700  |
| H | 8.57604100  | -3.90699100 | 1.03989400  |
| H | 9.38501900  | -2.92011400 | -0.20558100 |

|   |             |             |             |
|---|-------------|-------------|-------------|
| H | 9.33399000  | -2.37127700 | 1.48969300  |
| C | -8.35366800 | -2.44183900 | 0.56597500  |
| H | -9.15716800 | -1.72141200 | 0.35291900  |
| H | -8.59719200 | -3.39057300 | 0.07113300  |
| H | -8.34775800 | -2.60925300 | 1.65349100  |
| C | 7.17260100  | -1.63371900 | -0.82545500 |
| H | 7.89761100  | -1.74104900 | -1.63472300 |
| C | 5.97220200  | -0.96612800 | -1.06303100 |
| H | 5.74823600  | -0.54052700 | -2.04252900 |
| H | -2.85640500 | -0.03525400 | 4.36239800  |
| H | -0.29543900 | 0.26888000  | -1.77212600 |

**SMD-UM06-2X/Def2-SVP**

Electronic Energy (0K) = -2388.4752678

Electronic Energy (0K) + ZPE = -2387.897872

Enthalpy (298K) = -2387.861831

Free Energy (298K) = -2387.969920

**PhSe•**

Number of imaginary frequencies: 0

|   |             |             |             |
|---|-------------|-------------|-------------|
| C | -2.15995400 | -1.20616600 | -0.00001100 |
| C | -0.76505800 | -1.21346500 | 0.00002800  |
| C | -0.06667700 | -0.00010900 | 0.00003800  |
| C | -0.76497100 | 1.21341900  | 0.00002000  |
| C | -2.15977000 | 1.20626700  | -0.00001200 |
| C | -2.86135100 | 0.00005300  | -0.00001500 |
| H | -2.70121700 | -2.15392600 | -0.00001700 |
| H | -0.22108200 | -2.16041900 | -0.00000300 |
| H | -0.22075100 | 2.16023100  | 0.00001400  |
| H | -2.70103700 | 2.15402500  | -0.00000500 |

|    |             |             |             |
|----|-------------|-------------|-------------|
| H  | -3.95225500 | 0.00018200  | -0.00002200 |
| Se | 1.83714800  | -0.00000200 | -0.00000700 |

**SMD-UM06-2X/Def2-SVP**

Electronic Energy (0K) = -2632.6408929

Electronic Energy (0K) + ZPE = -2632.549798

Enthalpy (298K) = -2632.543181

Free Energy (298K) = -2632.581380

**PhSe<sup>-</sup>**

Number of imaginary frequencies: 0

|    |             |             |             |
|----|-------------|-------------|-------------|
| C  | -2.18004000 | -1.20201100 | 0.00002100  |
| C  | -0.78543200 | -1.20229600 | 0.00001800  |
| C  | -0.05107100 | -0.00002800 | -0.00009200 |
| C  | -0.78541400 | 1.20228300  | 0.00000300  |
| C  | -2.17999700 | 1.20203800  | 0.00003600  |
| C  | -2.89066600 | 0.00001100  | -0.00003200 |
| H  | -2.71683400 | -2.15375500 | 0.00003300  |
| H  | -0.24495300 | -2.15161100 | 0.00003700  |
| H  | -0.24486600 | 2.15155800  | 0.00002300  |
| H  | -2.71680300 | 2.15377500  | 0.00004800  |
| H  | -3.98207400 | 0.00004600  | -0.00003900 |
| Se | 1.85709600  | 0.00000000  | 0.00000500  |

**SMD-M06-2X/Def2-SVP**

Electronic Energy (0K) = -2632.8034562

Electronic Energy (0K) + ZPE = -2632.712891

Enthalpy (298K) = -2632.706249

Free Energy (298K) = -2632.743834

**Int-3**

Number of imaginary frequencies: 0

|   |             |             |             |
|---|-------------|-------------|-------------|
| S | -2.94975800 | -0.17343000 | -1.13200800 |
| S | 3.41194400  | 0.02659200  | -0.49642700 |
| O | -2.84578100 | 1.24974500  | -0.83224600 |
| O | -2.66859400 | -0.66847900 | -2.47182000 |
| N | -1.86639900 | -0.93793700 | -0.12798000 |
| C | -1.53726200 | -0.34364300 | 1.11692600  |
| C | -0.67040000 | 0.77956300  | 1.16263000  |
| C | -0.00856200 | 1.29351600  | -0.02109400 |
| C | 0.17719300  | 2.71098100  | -0.14556900 |
| C | 0.45270600  | 0.39415300  | -1.10990200 |
| H | 1.21967300  | 0.92314500  | -1.69298700 |
| C | -2.09812000 | -0.83476900 | 2.28854300  |
| H | -2.78792700 | -1.67853500 | 2.22948900  |
| C | -0.38819400 | 1.37281000  | 2.41051600  |
| H | 0.30597200  | 2.21232900  | 2.45859800  |
| C | 0.89896100  | -1.03824800 | -0.72385700 |
| H | 0.88715700  | -1.12294700 | 0.37334800  |
| C | -0.02239900 | -2.12008800 | -1.30545000 |
| H | 0.48546600  | -3.09588500 | -1.29430400 |
| H | -0.24978400 | -1.88033000 | -2.35510700 |
| C | -4.55519900 | -0.72753600 | -0.64583800 |
| C | -0.80925700 | 3.58461500  | 0.38237300  |
| H | -1.70417800 | 3.16430200  | 0.84215100  |
| C | -1.31302200 | -2.24934000 | -0.49944900 |
| H | -1.12205700 | -2.78407700 | 0.44154800  |
| H | -2.07084800 | -2.82142700 | -1.05232400 |
| C | -5.20738400 | -0.07693600 | 0.40311500  |
| H | -4.75319700 | 0.79185900  | 0.88265100  |
| C | 1.30376100  | 3.25628800  | -0.81178300 |

|   |             |             |             |
|---|-------------|-------------|-------------|
| H | 2.10377000  | 2.60650600  | -1.17004900 |
| C | -1.78319200 | -0.24950300 | 3.51948400  |
| O | 2.78995100  | 0.51519000  | 0.74410700  |
| C | -0.67683000 | 4.95571500  | 0.23102900  |
| H | -1.45254800 | 5.62283100  | 0.60766700  |
| C | -0.92877800 | 0.84935700  | 3.58065900  |
| H | -0.68029300 | 1.30155500  | 4.54098000  |
| C | 2.34604300  | -1.28758600 | -1.14456300 |
| H | 2.71410100  | -2.23643100 | -0.73093800 |
| H | 2.49487400  | -1.28060000 | -2.23419900 |
| C | -5.12150800 | -1.82413800 | -1.29417100 |
| H | -4.60050800 | -2.30221300 | -2.12506000 |
| C | -6.45022100 | -0.55034600 | 0.81069500  |
| H | -6.97268100 | -0.04997200 | 1.62856800  |
| C | 0.44967200  | 5.47777900  | -0.41155200 |
| H | 0.55799800  | 6.55874500  | -0.51779700 |
| C | 7.37352500  | -1.97482200 | 0.51872600  |
| C | 1.44007900  | 4.63071800  | -0.92125300 |
| H | 2.32404400  | 5.05044500  | -1.40192500 |
| C | 4.95555200  | -0.74476100 | -0.09581700 |
| C | 5.14334900  | -1.26599600 | 1.18486400  |
| H | 4.35606500  | -1.17977100 | 1.93565300  |
| C | 6.35486300  | -1.87943700 | 1.48081800  |
| H | 6.52080000  | -2.28929100 | 2.47949600  |
| C | -7.04814900 | -1.65344700 | 0.18259200  |
| C | -6.36737300 | -2.27913700 | -0.87089300 |
| H | -6.82423900 | -3.13447500 | -1.37263500 |
| O | 3.65174300  | 0.99293300  | -1.57815100 |
| C | 8.67744300  | -2.63650100 | 0.86508800  |
| H | 8.50916100  | -3.66010100 | 1.23056000  |

|   |             |             |             |
|---|-------------|-------------|-------------|
| H | 9.34596500  | -2.68032400 | -0.00380800 |
| H | 9.18824300  | -2.08462400 | 1.66837800  |
| C | -8.40864900 | -2.12979900 | 0.60721100  |
| H | -9.19068300 | -1.57067700 | 0.06951200  |
| H | -8.54639400 | -3.19510800 | 0.38046400  |
| H | -8.56857900 | -1.96959200 | 1.68180600  |
| C | 7.15232000  | -1.43414300 | -0.75410600 |
| H | 7.94018700  | -1.49502300 | -1.50736300 |
| C | 5.94574400  | -0.81383500 | -1.07190800 |
| H | 5.77778500  | -0.37985300 | -2.05891600 |
| H | -2.21889300 | -0.65493700 | 4.43388500  |
| H | -0.39745200 | 0.36541300  | -1.82002800 |

#### **SMD-M06-2X/Def2-SVP**

Electronic Energy (0K) = -2388.3081406

Electronic Energy (0K) + ZPE = -2387.729268

Enthalpy (298K) = -2387.693502

Free Energy (298K) = -2387.799154

#### **PhSeH**

Number of imaginary frequencies: 0

|   |             |             |             |
|---|-------------|-------------|-------------|
| C | -2.20012400 | -1.20200300 | 0.00001200  |
| C | -0.80528700 | -1.21827100 | 0.00001800  |
| C | -0.09588900 | -0.01255700 | -0.00001000 |
| C | -0.78903600 | 1.20356500  | -0.00001100 |
| C | -2.18338100 | 1.20868900  | -0.00000900 |
| C | -2.89463400 | 0.00802800  | -0.00000400 |
| H | -2.74587500 | -2.14740300 | 0.00002300  |
| H | -0.27011600 | -2.16977300 | 0.00003400  |
| H | -0.23964300 | 2.14762700  | -0.00005200 |
| H | -2.71599500 | 2.16149500  | -0.00002900 |

|    |             |             |             |
|----|-------------|-------------|-------------|
| H  | -3.98567100 | 0.01536400  | 0.00000200  |
| Se | 1.81689100  | 0.04355200  | 0.00001500  |
| H  | 1.99311800  | -1.41277300 | -0.00045700 |

**SMD-M06-2X/Def2-SVP**

Electronic Energy (0K) = -2633.2645119

Electronic Energy (0K) + ZPE = -2633.165531

Enthalpy (298K) = -2633.158156

Free Energy (298K) = -2633.197160

**3a**

Number of imaginary frequencies: 0

|   |             |             |             |
|---|-------------|-------------|-------------|
| S | -2.98064000 | -0.19856000 | -1.14721900 |
| S | 3.60599000  | 0.00823900  | 0.17650800  |
| O | -3.14093300 | 1.22531000  | -0.89175300 |
| O | -2.55809200 | -0.68252400 | -2.45448300 |
| N | -1.89685700 | -0.77758500 | -0.04497500 |
| C | -1.69591500 | -0.08078100 | 1.18421300  |
| C | -0.80566900 | 1.00828800  | 1.25138600  |
| C | -0.03836300 | 1.46097700  | 0.05966700  |
| C | -0.08293300 | 2.91031900  | -0.28030700 |
| C | 0.71175800  | 0.61314800  | -0.66711100 |
| H | 1.20040900  | 1.00845100  | -1.56414400 |
| C | -2.39536400 | -0.49893500 | 2.32142300  |
| H | -3.07747200 | -1.34745500 | 2.23463000  |
| C | -0.65994600 | 1.66927700  | 2.47954400  |
| H | 0.02159800  | 2.52032300  | 2.54160200  |
| C | 1.03328900  | -0.82157400 | -0.33391600 |
| H | 0.92401200  | -0.96940100 | 0.75289300  |
| C | 0.12273600  | -1.83487300 | -1.05639000 |
| H | 0.62727300  | -2.81202600 | -1.11391900 |



|   |             |             |             |
|---|-------------|-------------|-------------|
| H | -0.06697300 | -1.49599900 | -2.08609900 |
| C | -4.52605600 | -0.98596500 | -0.76199600 |
| C | -1.26433200 | 3.65380100  | -0.13440800 |
| H | -2.16866600 | 3.15034600  | 0.21098400  |
| C | -1.19822900 | -2.03450400 | -0.32798800 |
| H | -1.02692300 | -2.52462500 | 0.64176300  |
| H | -1.86168200 | -2.69122600 | -0.90961300 |
| C | -5.34535400 | -0.42896400 | 0.22319600  |
| H | -5.06060300 | 0.50534700  | 0.71016100  |
| C | 1.07456000  | 3.56004300  | -0.73809500 |
| H | 2.00820400  | 2.99526100  | -0.80484700 |
| C | -2.22207500 | 0.15855800  | 3.53633500  |
| O | 3.20009500  | 0.04170000  | 1.58381600  |
| C | -1.29236600 | 5.00789500  | -0.46349000 |
| H | -2.22133300 | 5.57116500  | -0.35606500 |
| C | -1.35238300 | 1.24797100  | 3.61180600  |
| H | -1.21036600 | 1.77091200  | 4.55899100  |
| C | 2.49366500  | -1.11989300 | -0.68063000 |
| H | 2.77910000  | -2.13017400 | -0.35488300 |
| H | 2.70839100  | -1.00820200 | -1.75417600 |
| C | -4.87979800 | -2.16128400 | -1.41993200 |
| H | -4.23775800 | -2.56228400 | -2.20568700 |
| C | -6.52849700 | -1.07800600 | 0.55717600  |
| H | -7.17949900 | -0.64922100 | 1.32237900  |
| C | -0.14081700 | 5.64270700  | -0.93317500 |
| H | -0.16423900 | 6.70422200  | -1.18649200 |
| C | 7.67650600  | -2.03886700 | -0.09407200 |
| C | 1.04247900  | 4.91503900  | -1.06643800 |
| H | 1.95178600  | 5.40817200  | -1.41543700 |
| C | 5.19592500  | -0.78335200 | 0.07526500  |

|   |             |             |             |
|---|-------------|-------------|-------------|
| C | 5.57710400  | -1.67341400 | 1.07990500  |
| H | 4.91211500  | -1.86213700 | 1.92455500  |
| C | 6.81648400  | -2.29611300 | 0.98577900  |
| H | 7.13077200  | -2.99220200 | 1.76666900  |
| C | -6.90750100 | -2.27076400 | -0.07972500 |
| C | -6.07117400 | -2.79672700 | -1.07114300 |
| H | -6.35990800 | -3.71564700 | -1.58536400 |
| O | 3.69148800  | 1.26452800  | -0.57662700 |
| C | 9.01334900  | -2.72211800 | -0.17128600 |
| H | 8.89168300  | -3.81539500 | -0.16370000 |
| H | 9.55587800  | -2.43858800 | -1.08206800 |
| H | 9.63338000  | -2.45829100 | 0.69851700  |
| C | -8.19045500 | -2.95516400 | 0.30225400  |
| H | -9.04321000 | -2.26760500 | 0.20308000  |
| H | -8.37704000 | -3.83470400 | -0.32685700 |
| H | -8.15703100 | -3.28175700 | 1.35261200  |
| C | 7.26615100  | -1.13444500 | -1.08125800 |
| H | 7.92944400  | -0.91922000 | -1.92136000 |
| C | 6.02758600  | -0.49951500 | -1.00407500 |
| H | 5.71222900  | 0.21616900  | -1.76500100 |
| H | -2.76782300 | -0.17467700 | 4.42036300  |

**SMD-M06-2X/Def2-SVP**

Electronic Energy (0K) = -2387.9031476

Electronic Energy (0K) + ZPE = -2387.336576

Enthalpy (298K) = -2387.300730

Free Energy (298K) = -2387.407681

**TS<sub>1</sub>**

Number of imaginary frequencies: 1

|   |            |             |            |
|---|------------|-------------|------------|
| C | 1.04110900 | -0.20452700 | 3.36155900 |
|---|------------|-------------|------------|

|   |             |             |             |
|---|-------------|-------------|-------------|
| C | -0.33973600 | -0.01367400 | 3.29283700  |
| C | -1.01031500 | -0.24552300 | 2.09423500  |
| C | -0.30544800 | -0.62634700 | 0.94920600  |
| C | 1.09198700  | -0.80060600 | 1.00144100  |
| C | 1.74475900  | -0.60681200 | 2.22967300  |
| C | 1.90113400  | -1.11932200 | -0.20268200 |
| C | 1.80852500  | -0.31705300 | -1.30687400 |
| N | -1.00362200 | -0.92611700 | -0.25849200 |
| C | -1.18646700 | -2.32636200 | -0.64292100 |
| C | -2.10961900 | -3.08999300 | 0.30877000  |
| C | -2.28552400 | -4.51412000 | -0.12847800 |
| C | -3.44830600 | -5.05680900 | -0.48987400 |
| C | 2.90721100  | -2.19499200 | -0.11794200 |
| C | 2.68958100  | -3.31439600 | 0.70530400  |
| C | 3.62282400  | -4.34627800 | 0.76439300  |
| C | 4.79879500  | -4.27225700 | 0.01591500  |
| C | 5.03501800  | -3.15852300 | -0.79252900 |
| C | 4.09994900  | -2.12959600 | -0.86098900 |
| C | -3.42938200 | 0.33279900  | -0.68548500 |
| C | -4.32871500 | -0.53976200 | -1.29767800 |
| C | -5.66120200 | -0.52364600 | -0.89366700 |
| C | -6.10614900 | 0.35979200  | 0.09984500  |
| C | -5.17991700 | 1.23618200  | 0.68358100  |
| C | -3.84252900 | 1.23146600  | 0.29747000  |
| C | -7.55252700 | 0.39532600  | 0.50766700  |
| S | -1.71616300 | 0.27497300  | -1.14823000 |
| O | -1.66311000 | -0.13961800 | -2.54280200 |
| O | -1.09237800 | 1.52301400  | -0.72765100 |
| H | 1.57292200  | -0.03812300 | 4.29971900  |
| H | -0.89949400 | 0.29315500  | 4.17765000  |

|   |             |             |             |
|---|-------------|-------------|-------------|
| H | -2.09597800 | -0.14584500 | 2.03764900  |
| H | 2.82800000  | -0.73531800 | 2.27034200  |
| H | 2.32775200  | -0.57025000 | -2.23463500 |
| H | 1.04032700  | 0.45796900  | -1.36095500 |
| H | -1.58187600 | -2.34574600 | -1.66740000 |
| H | -0.19272500 | -2.80399900 | -0.68051400 |
| H | -3.08728600 | -2.58468000 | 0.35927700  |
| H | -1.66973000 | -3.06510600 | 1.32055600  |
| H | -1.37562000 | -5.12606500 | -0.16041000 |
| H | -3.51701800 | -6.09935000 | -0.80963500 |
| H | -4.37484600 | -4.47360400 | -0.47348000 |
| H | 1.77153900  | -3.37921000 | 1.29373100  |
| H | 3.43125700  | -5.21295200 | 1.39934700  |
| H | 5.53352400  | -5.07752000 | 0.06781400  |
| H | 5.95944700  | -3.08558700 | -1.36779600 |
| H | 4.31354800  | -1.25416000 | -1.47778200 |
| H | -3.99128700 | -1.21872400 | -2.08305400 |
| H | -6.37268400 | -1.20604800 | -1.36331100 |
| H | -5.51465300 | 1.93683800  | 1.45145300  |
| H | -3.12359200 | 1.91945700  | 0.74550900  |
| H | -7.65688300 | 0.61177800  | 1.57948500  |
| H | -8.05263100 | -0.55670000 | 0.28697400  |
| H | -8.08430300 | 1.18804200  | -0.04192600 |
| C | 2.49277100  | 2.77234800  | -0.26921800 |
| C | 1.95643700  | 2.86674200  | 1.01348600  |
| C | 1.07034300  | 3.90496400  | 1.28849500  |
| C | 0.70894000  | 4.82998500  | 0.29905000  |
| C | 1.26602600  | 4.69988300  | -0.98224400 |
| C | 2.15270400  | 3.67005500  | -1.28014100 |
| C | -0.28193900 | 5.92173400  | 0.59141600  |

|   |             |            |             |
|---|-------------|------------|-------------|
| S | 3.52551000  | 1.37622300 | -0.66643800 |
| O | 4.14305300  | 0.88799000 | 0.58011200  |
| O | 4.37979200  | 1.72624500 | -1.81836600 |
| H | 2.23900400  | 2.14502400 | 1.78200400  |
| H | 0.65034400  | 3.99917400 | 2.29222000  |
| H | 0.99861000  | 5.41923300 | -1.75922600 |
| H | 2.58621100  | 3.56684100 | -2.27623000 |
| H | -0.31886500 | 6.15048700 | 1.66455800  |
| H | -0.03643300 | 6.83957100 | 0.04012800  |
| H | -1.29164800 | 5.60999500 | 0.28001300  |

**SMD-UM06-2X/Def2-SVP**

Electronic Energy (0K) = -2388.4184476

Electronic Energy (0K) + ZPE = -2387.848304

Enthalpy (298K) = -2387.809825

Free Energy (298K) = -2387.926134

**INT-1'**

Number of imaginary frequencies: 0

|   |             |             |             |
|---|-------------|-------------|-------------|
| C | 1.65241800  | 0.06573200  | 3.52568300  |
| C | 0.28376300  | 0.33994100  | 3.58188000  |
| C | -0.50214600 | 0.15041900  | 2.45037300  |
| C | 0.06528500  | -0.27053200 | 1.24361200  |
| C | 1.45260800  | -0.54172600 | 1.16387700  |
| C | 2.21806800  | -0.38257000 | 2.33958500  |
| C | 2.14547800  | -0.92788200 | -0.07351800 |
| C | 1.91359500  | -0.17609600 | -1.33387700 |
| N | -0.76614800 | -0.49375700 | 0.10956400  |
| C | -0.89097200 | -1.83321700 | -0.47111300 |
| C | -1.69277300 | -2.78276200 | 0.42088600  |
| C | -1.79174200 | -4.15046300 | -0.18685100 |

|   |             |             |             |
|---|-------------|-------------|-------------|
| C | -2.93395500 | -4.74117200 | -0.53848400 |
| C | 3.17517700  | -1.95207300 | -0.04879800 |
| C | 3.12780900  | -3.00222900 | 0.89884000  |
| C | 4.08217000  | -4.01233600 | 0.89756700  |
| C | 5.11888900  | -4.00397900 | -0.03969400 |
| C | 5.18724600  | -2.97203600 | -0.97888900 |
| C | 4.23103700  | -1.96268300 | -0.98981400 |
| C | -3.35870900 | 0.13293000  | -0.45848000 |
| C | -3.90761500 | -0.54595600 | -1.54490400 |
| C | -5.19196600 | -1.07109300 | -1.42908700 |
| C | -5.93377700 | -0.91692700 | -0.24944300 |
| C | -5.36028300 | -0.20980800 | 0.81776100  |
| C | -4.07697800 | 0.31968700  | 0.72207000  |
| C | -7.32911400 | -1.46598900 | -0.14638600 |
| S | -1.68906200 | 0.72811200  | -0.54828800 |
| O | -1.34941000 | 0.82903000  | -1.96526400 |
| O | -1.54745800 | 1.88541300  | 0.31894100  |
| H | 2.27981300  | 0.20377200  | 4.40753900  |
| H | -0.17560300 | 0.68117500  | 4.51068200  |
| H | -1.57752600 | 0.32200800  | 2.49127200  |
| H | 3.29077600  | -0.57825400 | 2.29028000  |
| H | 2.27611800  | -0.70716300 | -2.22417500 |
| H | 0.86969700  | 0.11774000  | -1.50821600 |
| H | -1.36469200 | -1.73694600 | -1.45916900 |
| H | 0.11606100  | -2.24110000 | -0.65454500 |
| H | -2.69954800 | -2.36910800 | 0.59251700  |
| H | -1.18587200 | -2.84592700 | 1.39935000  |
| H | -0.84275100 | -4.67380200 | -0.35702100 |
| H | -2.94656700 | -5.73835600 | -0.98502100 |
| H | -3.89845000 | -4.24627700 | -0.38452000 |

|   |             |             |             |
|---|-------------|-------------|-------------|
| H | 2.31395700  | -3.03130800 | 1.62589500  |
| H | 4.01420200  | -4.81816200 | 1.63060100  |
| H | 5.86903400  | -4.79638900 | -0.03766500 |
| H | 5.99992000  | -2.94840100 | -1.70702700 |
| H | 4.32717600  | -1.14882900 | -1.70914100 |
| H | -3.33658000 | -0.65728700 | -2.46799300 |
| H | -5.62914600 | -1.61030400 | -2.27207300 |
| H | -5.93129900 | -0.07066900 | 1.73796300  |
| H | -3.64149700 | 0.87960900  | 1.55169300  |
| H | -7.61032600 | -1.64452200 | 0.89969800  |
| H | -7.42817000 | -2.40509100 | -0.70727700 |
| H | -8.05177000 | -0.75052700 | -0.56965500 |
| C | 1.76795600  | 2.60619500  | -0.65336700 |
| C | 1.84548900  | 2.84215900  | 0.71797600  |
| C | 0.99336700  | 3.78806100  | 1.28061300  |
| C | 0.08151900  | 4.49937300  | 0.49008300  |
| C | 0.04856800  | 4.25655800  | -0.88920900 |
| C | 0.88108200  | 3.30684500  | -1.46961700 |
| C | -0.88427200 | 5.46554500  | 1.11455400  |
| S | 2.84101700  | 1.40190500  | -1.39666300 |
| O | 4.03751300  | 1.27126600  | -0.55993300 |
| O | 2.98710100  | 1.73427800  | -2.81614100 |
| H | 2.56873300  | 2.29811800  | 1.32807100  |
| H | 1.03845700  | 3.97932000  | 2.35507100  |
| H | -0.65172900 | 4.81313200  | -1.51582800 |
| H | 0.85614100  | 3.11283800  | -2.54278200 |
| H | -0.50002600 | 5.86450000  | 2.06268900  |
| H | -1.10839500 | 6.30261300  | 0.43949600  |
| H | -1.83370600 | 4.94821100  | 1.32777600  |

**SMD-UM06-2X/Def2-SVP**

Electronic Energy (0K) = -2388.4408451

Electronic Energy (0K) + ZPE = -2387.868075

Enthalpy (298K) = -2387.830320

Free Energy (298K) = -2387.941376

## TS<sub>2</sub>

Number of imaginary frequencies: 1

|   |             |             |             |
|---|-------------|-------------|-------------|
| C | 2.39899100  | 0.19317100  | 3.13658300  |
| C | 3.10351500  | -0.96253400 | 2.80447700  |
| C | 3.13103300  | -1.38186600 | 1.47939400  |
| C | 2.45119100  | -0.67190200 | 0.47958300  |
| C | 1.77614800  | 0.53108900  | 0.78901600  |
| C | 1.76028900  | 0.92443000  | 2.14144800  |
| C | 1.01593200  | 1.40401600  | -0.18072900 |
| C | -0.33014200 | 0.85544400  | -0.55813900 |
| N | 2.49958700  | -1.15692400 | -0.87436200 |
| C | 3.75967300  | -0.90266600 | -1.62087800 |
| C | 4.22086200  | 0.54050600  | -1.54010900 |
| C | 3.23102800  | 1.56269900  | -1.99076100 |
| C | 1.88506700  | 1.33150600  | -2.15279800 |
| C | 1.15001900  | 2.86872700  | 0.00593300  |
| C | 2.37142200  | 3.41175100  | 0.45219700  |
| C | 2.56189000  | 4.78732500  | 0.55048100  |
| C | 1.53955300  | 5.66915800  | 0.19559300  |
| C | 0.32780900  | 5.15100800  | -0.26222200 |
| C | 0.13649300  | 3.77409800  | -0.35622700 |
| C | 0.43463300  | -2.93295300 | -0.37218000 |
| C | 0.37967200  | -3.40934300 | 0.93866900  |
| C | -0.86120200 | -3.69498500 | 1.49233500  |
| C | -2.03953300 | -3.53466300 | 0.74966400  |



|   |             |             |             |
|---|-------------|-------------|-------------|
| C | -1.94929500 | -3.07231200 | -0.56887000 |
| C | -0.71627900 | -2.77069800 | -1.14041700 |
| C | -3.37046900 | -3.83779700 | 1.37823700  |
| S | 2.00089000  | -2.74505700 | -1.17014700 |
| O | 2.93267800  | -3.69387900 | -0.56246800 |
| O | 1.80269600  | -2.81770800 | -2.61398500 |
| H | 2.34817600  | 0.53283100  | 4.17227300  |
| H | 3.62708200  | -1.53653200 | 3.57054800  |
| H | 3.67213400  | -2.28584500 | 1.19679100  |
| H | 1.20601600  | 1.82474800  | 2.41001500  |
| H | -0.83847600 | 1.44568700  | -1.33242300 |
| H | -0.26803400 | -0.19241700 | -0.88254400 |
| H | 4.56046800  | -1.56132500 | -1.24187600 |
| H | 3.56468500  | -1.17095200 | -2.66803800 |
| H | 5.14562600  | 0.62005700  | -2.13516700 |
| H | 4.53052700  | 0.77841300  | -0.50436800 |
| H | 3.59432600  | 2.59354200  | -2.03100300 |
| H | 1.26614300  | 2.14568700  | -2.53813600 |
| H | 1.51961300  | 0.32091200  | -2.33320500 |
| H | 3.18961100  | 2.74064900  | 0.72036400  |
| H | 3.52036800  | 5.17300500  | 0.90310800  |
| H | 1.68675000  | 6.74761900  | 0.27284300  |
| H | -0.48372400 | 5.82417200  | -0.54487300 |
| H | -0.82758600 | 3.41032300  | -0.70982900 |
| H | 1.29687400  | -3.57230700 | 1.50587100  |
| H | -0.91969600 | -4.06268500 | 2.51893300  |
| H | -2.85794000 | -2.96034400 | -1.16432400 |
| H | -0.64083500 | -2.44140200 | -2.17790800 |
| H | -4.18479100 | -3.78914100 | 0.64320400  |
| H | -3.58352100 | -3.11576800 | 2.18257200  |

|   |             |             |             |
|---|-------------|-------------|-------------|
| H | -3.37069400 | -4.83810000 | 1.83497800  |
| C | -3.10178700 | 0.81491700  | 0.18097100  |
| C | -3.86900700 | -0.34315700 | 0.21126200  |
| C | -5.16255200 | -0.31247000 | -0.31038300 |
| C | -5.69084600 | 0.86219500  | -0.85658300 |
| C | -4.89655600 | 2.02157900  | -0.85683700 |
| C | -3.60918000 | 2.01029900  | -0.33409500 |
| C | -7.08070900 | 0.90021500  | -1.42795800 |
| S | -1.46226000 | 0.78441900  | 0.88213600  |
| O | -1.27459600 | -0.50773000 | 1.54498700  |
| O | -1.30404300 | 2.01329700  | 1.66545600  |
| H | -3.45397600 | -1.24833600 | 0.65318400  |
| H | -5.77463200 | -1.21670000 | -0.28624000 |
| H | -5.30410400 | 2.94964600  | -1.26369000 |
| H | -3.01202400 | 2.92437600  | -0.31165600 |
| H | -7.59376700 | -0.06074000 | -1.29533000 |
| H | -7.67905900 | 1.68586000  | -0.94374700 |
| H | -7.05058000 | 1.13118700  | -2.50348900 |

**SMD-UM06-2X/Def2-SVP**

Electronic Energy (0K) = -2388.4073535

Electronic Energy (0K) + ZPE = -2387.833671

Enthalpy (298K) = -2387.797825

Free Energy (298K) = -2387.901203

**INT-2'**

Number of imaginary frequencies: 0

|   |            |             |            |
|---|------------|-------------|------------|
| C | 2.02655800 | 0.73356700  | 3.11136900 |
| C | 3.05654000 | -0.18028300 | 2.89877700 |
| C | 3.32666300 | -0.59930700 | 1.60232200 |
| C | 2.56979700 | -0.13169000 | 0.51753000 |

|   |             |             |             |
|---|-------------|-------------|-------------|
| C | 1.55678700  | 0.83133300  | 0.70699700  |
| C | 1.30583800  | 1.23111800  | 2.03126400  |
| C | 0.67724500  | 1.45550700  | -0.40044400 |
| C | -0.63273400 | 0.64955000  | -0.51873600 |
| N | 2.87998300  | -0.62109400 | -0.79679200 |
| C | 4.00972100  | 0.02556700  | -1.49710000 |
| C | 3.87453700  | 1.54148300  | -1.48648200 |
| C | 2.59429800  | 2.05768300  | -2.05451800 |
| C | 1.26818800  | 1.39943400  | -1.86362500 |
| C | 0.44840100  | 2.95541600  | -0.14515500 |
| C | 1.51170400  | 3.75343000  | 0.30062000  |
| C | 1.37919500  | 5.13647000  | 0.41901300  |
| C | 0.17574200  | 5.75741800  | 0.08614200  |
| C | -0.88652100 | 4.97861700  | -0.36955700 |
| C | -0.74894600 | 3.59477200  | -0.48541300 |
| C | 1.30776000  | -2.81274400 | -0.37515100 |
| C | 1.25799800  | -3.24461200 | 0.95170400  |
| C | 0.05596600  | -3.72783900 | 1.45076700  |
| C | -1.08551900 | -3.80728100 | 0.63970100  |
| C | -0.99666200 | -3.38923800 | -0.69386800 |
| C | 0.19791400  | -2.89253300 | -1.21256800 |
| C | -2.37574100 | -4.31981600 | 1.21442400  |
| S | 2.84827100  | -2.28055800 | -1.06185200 |
| O | 3.92585200  | -2.94764000 | -0.33387100 |
| O | 2.80544600  | -2.44059100 | -2.51136300 |
| H | 1.78624900  | 1.07248100  | 4.12030500  |
| H | 3.64576200  | -0.56367800 | 3.73321600  |
| H | 4.12330900  | -1.31756500 | 1.40432700  |
| H | 0.51223100  | 1.95484800  | 2.21687000  |
| H | -1.27004400 | 1.05319800  | -1.31708100 |

|   |             |             |             |
|---|-------------|-------------|-------------|
| H | -0.40290800 | -0.39762800 | -0.76265100 |
| H | 4.96841400  | -0.26604900 | -1.03255300 |
| H | 3.99961700  | -0.34425000 | -2.53126200 |
| H | 4.72518800  | 1.95030300  | -2.05295200 |
| H | 4.01683600  | 1.90383500  | -0.44830200 |
| H | 2.60666800  | 3.06660500  | -2.47096800 |
| H | 0.52660100  | 1.91445800  | -2.49159200 |
| H | 1.29814100  | 0.34923200  | -2.18452300 |
| H | 2.46174000  | 3.28592500  | 0.56646600  |
| H | 2.22420200  | 5.72975000  | 0.77312200  |
| H | 0.06688400  | 6.83919600  | 0.18067300  |
| H | -1.83601800 | 5.44723600  | -0.63479200 |
| H | -1.60500700 | 3.02153600  | -0.84260100 |
| H | 2.15195200  | -3.21106000 | 1.57549700  |
| H | -0.00027100 | -4.05926200 | 2.48968900  |
| H | -1.87250300 | -3.46451500 | -1.34220400 |
| H | 0.27530400  | -2.58708700 | -2.25738400 |
| H | -3.14657200 | -4.43310600 | 0.44061400  |
| H | -2.74956300 | -3.62372300 | 1.98170200  |
| H | -2.22690400 | -5.29283600 | 1.70465600  |
| C | -3.30032900 | 0.19362400  | 0.23343100  |
| C | -3.71402700 | -1.11829400 | 0.03264100  |
| C | -4.96949200 | -1.35224300 | -0.52707200 |
| C | -5.80964600 | -0.28953600 | -0.88022100 |
| C | -5.36712100 | 1.02407100  | -0.65329600 |
| C | -4.11912500 | 1.27557600  | -0.09447300 |
| C | -7.16750700 | -0.53493300 | -1.47673400 |
| S | -1.69461100 | 0.50013500  | 0.94472300  |
| O | -1.28958100 | -0.69671400 | 1.68420500  |
| O | -1.78161900 | 1.78149100  | 1.65140900  |

|   |             |             |             |
|---|-------------|-------------|-------------|
| H | -3.06083200 | -1.94087600 | 0.32383400  |
| H | -5.30603700 | -2.37900800 | -0.68580700 |
| H | -6.01975800 | 1.86082100  | -0.91226300 |
| H | -3.78526000 | 2.29616400  | 0.10256700  |
| H | -7.34402500 | -1.60532500 | -1.64207300 |
| H | -7.95637100 | -0.15260700 | -0.81159400 |
| H | -7.27113200 | -0.01069400 | -2.43808600 |

**SMD-UM06-2X/Def2-SVP**

Electronic Energy (0K) = -2388.4374161

Electronic Energy (0K) + ZPE = -2387.861188

Enthalpy (298K) = -2387.825528

Free Energy (298K) = -2387.927906

**INT-3'**

Number of imaginary frequencies: 0

|   |             |             |             |
|---|-------------|-------------|-------------|
| C | 2.01331400  | 0.69543700  | 3.12333800  |
| C | 3.06109000  | -0.19520900 | 2.89817200  |
| C | 3.34636100  | -0.58544100 | 1.59643600  |
| C | 2.58440500  | -0.10953400 | 0.52081400  |
| C | 1.55335100  | 0.83030200  | 0.72459400  |
| C | 1.28659000  | 1.20412600  | 2.05274600  |
| C | 0.66367600  | 1.45295100  | -0.37082900 |
| C | -0.63046900 | 0.62451300  | -0.51493000 |
| N | 2.89733900  | -0.56939900 | -0.80342100 |
| C | 4.04488000  | 0.07252900  | -1.45077100 |
| C | 3.80769800  | 1.55793700  | -1.63297000 |
| C | 2.52679400  | 2.07804400  | -1.97252500 |
| C | 1.24682100  | 1.38738700  | -1.86231800 |
| C | 0.40973800  | 2.95533600  | -0.12306800 |
| C | 1.41892900  | 3.76088900  | 0.42059700  |

|   |             |             |             |
|---|-------------|-------------|-------------|
| C | 1.25228500  | 5.14077800  | 0.53802300  |
| C | 0.06917400  | 5.74243600  | 0.11261700  |
| C | -0.93969400 | 4.95160900  | -0.43488200 |
| C | -0.76881800 | 3.57267700  | -0.55457500 |
| C | 1.33739400  | -2.78188700 | -0.39959600 |
| C | 1.32577400  | -3.21613300 | 0.92832500  |
| C | 0.14068100  | -3.70951300 | 1.45533500  |
| C | -1.02021800 | -3.79623200 | 0.67219300  |
| C | -0.96862400 | -3.37521800 | -0.66265100 |
| C | 0.20887100  | -2.87110200 | -1.21151000 |
| C | -2.28919400 | -4.32589300 | 1.27610900  |
| S | 2.85278300  | -2.23741800 | -1.11839700 |
| O | 3.96110700  | -2.89684000 | -0.43828100 |
| O | 2.77007900  | -2.33611400 | -2.57043400 |
| H | 1.76249700  | 1.00914000  | 4.13749900  |
| H | 3.65113200  | -0.58452500 | 3.72890000  |
| H | 4.15464300  | -1.28822400 | 1.38763100  |
| H | 0.48131700  | 1.91102100  | 2.25174000  |
| H | -1.26357000 | 1.01681000  | -1.32156900 |
| H | -0.37937100 | -0.41947300 | -0.74668400 |
| H | 4.97468100  | -0.07062000 | -0.87676400 |
| H | 4.17956200  | -0.38163500 | -2.44245400 |
| H | 4.62811500  | 2.09219200  | -2.13437400 |
| H | 3.78868100  | 2.10361300  | -0.62920800 |
| H | 2.50668400  | 3.14083000  | -2.24405600 |
| H | 0.51174700  | 1.91959200  | -2.47907800 |
| H | 1.34841000  | 0.33693800  | -2.15511900 |
| H | 2.34884300  | 3.30817100  | 0.77166900  |
| H | 2.05202300  | 5.74404800  | 0.97056200  |
| H | -0.06692400 | 6.82070100  | 0.20870900  |

|   |             |             |             |
|---|-------------|-------------|-------------|
| H | -1.87261800 | 5.40711800  | -0.77081000 |
| H | -1.58111700 | 2.98770900  | -0.98786100 |
| H | 2.23406300  | -3.17921600 | 1.53083900  |
| H | 0.11342400  | -4.04525200 | 2.49385100  |
| H | -1.85996100 | -3.45759900 | -1.28842200 |
| H | 0.25731500  | -2.56726700 | -2.25848800 |
| H | -3.08021700 | -4.43706300 | 0.52291300  |
| H | -2.64626400 | -3.64316000 | 2.06298700  |
| H | -2.11706000 | -5.30309700 | 1.75007800  |
| C | -3.28840600 | 0.15538900  | 0.23305700  |
| C | -3.72272900 | -1.16013800 | 0.11927200  |
| C | -4.97354800 | -1.40867200 | -0.44470900 |
| C | -5.78541400 | -0.35785300 | -0.88789100 |
| C | -5.32094900 | 0.96085700  | -0.74687400 |
| C | -4.07862400 | 1.22833200  | -0.18475200 |
| C | -7.13500400 | -0.61908000 | -1.49514700 |
| S | -1.69629200 | 0.48506900  | 0.95244300  |
| O | -1.27283100 | -0.69310500 | 1.70725500  |
| O | -1.78364000 | 1.78143000  | 1.62825300  |
| H | -3.09189400 | -1.97213600 | 0.48069900  |
| H | -5.32937500 | -2.43715600 | -0.53458900 |
| H | -5.95313900 | 1.78861600  | -1.07565700 |
| H | -3.72763600 | 2.25408700  | -0.05486300 |
| H | -7.35652700 | -1.69314200 | -1.53001100 |
| H | -7.92387900 | -0.11898600 | -0.91400200 |
| H | -7.18331000 | -0.21936100 | -2.51897700 |

**SMD-M06-2X/Def2-SVP**

Electronic Energy (0K) = -2388.2520438

Electronic Energy (0K) + ZPE = -2387.674759

Enthalpy (298K) = -2387.639445

Free Energy (298K) = -2387.739840

**3a'**

Number of imaginary frequencies: 0

|   |             |             |             |
|---|-------------|-------------|-------------|
| C | 2.07993100  | 0.73303300  | 3.11931900  |
| C | 2.82853700  | -0.43243600 | 2.99156100  |
| C | 3.02307100  | -0.97211300 | 1.72561100  |
| C | 2.45157700  | -0.38386800 | 0.58851800  |
| C | 1.70766300  | 0.81216400  | 0.69651000  |
| C | 1.54135400  | 1.33850300  | 1.98825500  |
| C | 0.94742900  | 1.50932300  | -0.45698700 |
| C | -0.42554200 | 0.80473600  | -0.59029500 |
| N | 2.72483700  | -0.96061400 | -0.70058500 |
| C | 4.00076800  | -0.51028800 | -1.29363200 |
| C | 3.97262000  | 1.00081500  | -1.51092800 |
| C | 2.77196800  | 1.36674200  | -2.32725100 |
| C | 1.51907900  | 1.47468800  | -1.88071800 |
| C | 0.82791400  | 3.03503100  | -0.22947700 |
| C | 1.96899900  | 3.75531000  | 0.15511800  |
| C | 1.94424700  | 5.14265600  | 0.26272800  |
| C | 0.77464700  | 5.84907600  | -0.02589800 |
| C | -0.35983100 | 5.14811600  | -0.42490800 |
| C | -0.33214400 | 3.75491600  | -0.52600500 |
| C | 0.87242900  | -2.95461700 | -0.34944300 |
| C | 0.69350000  | -3.47590800 | 0.93180500  |
| C | -0.58204600 | -3.86681300 | 1.32025200  |
| C | -1.66910800 | -3.76281000 | 0.44135500  |
| C | -1.45573700 | -3.23508700 | -0.83923200 |
| C | -0.18652300 | -2.83352400 | -1.24692800 |
| C | -3.03591300 | -4.21154200 | 0.87852900  |



|   |             |             |             |
|---|-------------|-------------|-------------|
| S | 2.50608600  | -2.61554900 | -0.93266100 |
| O | 3.44943200  | -3.38814700 | -0.12597800 |
| O | 2.53753000  | -2.80973500 | -2.37728600 |
| H | 1.91166500  | 1.18078800  | 4.09995400  |
| H | 3.26965800  | -0.91451100 | 3.86529400  |
| H | 3.62713300  | -1.87029200 | 1.59583300  |
| H | 0.94644600  | 2.24122100  | 2.11482000  |
| H | -1.04277400 | 1.27176400  | -1.36899200 |
| H | -0.27185300 | -0.24945300 | -0.86123600 |
| H | 4.84754400  | -0.78980400 | -0.64328500 |
| H | 4.11292100  | -1.02260100 | -2.25797800 |
| H | 4.89916300  | 1.28555500  | -2.02721400 |
| H | 3.97348400  | 1.51254500  | -0.53804500 |
| H | 2.91915700  | 1.46547300  | -3.40710700 |
| H | 0.74650600  | 1.70645700  | -2.62186500 |
| H | 2.89442400  | 3.22033000  | 0.37806400  |
| H | 2.84573000  | 5.67514200  | 0.57109500  |
| H | 0.75138000  | 6.93688800  | 0.05774300  |
| H | -1.28210400 | 5.68332500  | -0.65810500 |
| H | -1.24263800 | 3.24429300  | -0.83762600 |
| H | 1.54574000  | -3.59035100 | 1.60279600  |
| H | -0.73788700 | -4.27580900 | 2.32074900  |
| H | -2.29434700 | -3.15379000 | -1.53427500 |
| H | -0.01029400 | -2.45285200 | -2.25447600 |
| H | -3.78029100 | -4.06123200 | 0.08548800  |
| H | -3.35813300 | -3.65876200 | 1.77434200  |
| H | -3.02597800 | -5.27913000 | 1.14456800  |
| C | -3.10750700 | 0.52834800  | 0.24250400  |
| C | -3.67532300 | -0.73853700 | 0.18132600  |
| C | -4.97271800 | -0.87502300 | -0.31190300 |

|   |             |             |             |
|---|-------------|-------------|-------------|
| C | -5.70196600 | 0.24113500  | -0.73778500 |
| C | -5.10680200 | 1.51040700  | -0.64563700 |
| C | -3.81675000 | 1.66468000  | -0.15170400 |
| C | -7.09600700 | 0.09893300  | -1.28159500 |
| S | -1.45965500 | 0.71117500  | 0.89905900  |
| O | -1.11886700 | -0.51822900 | 1.61567400  |
| O | -1.43272300 | 1.99090900  | 1.61246200  |
| H | -3.10521700 | -1.59763600 | 0.53349300  |
| H | -5.43059800 | -1.86553000 | -0.35749300 |
| H | -5.67372000 | 2.39141200  | -0.95458800 |
| H | -3.37129400 | 2.65628200  | -0.05086800 |
| H | -7.47043900 | -0.92514200 | -1.15801900 |
| H | -7.78590200 | 0.78884900  | -0.77470200 |
| H | -7.11810300 | 0.34617800  | -2.35401300 |

**SMD-M06-2X/Def2-SVP**

Electronic Energy (0K) = -2387.8692893

Electronic Energy (0K) + ZPE = -2387.302550

Enthalpy (298K) = -2387.267285

Free Energy (298K) = -2387.369743

**TS1<sup>o</sup>**

Number of imaginary frequencies: 1

|   |             |             |             |
|---|-------------|-------------|-------------|
| S | 2.83470500  | -0.73114700 | 1.19793900  |
| O | 2.94976800  | 0.37564300  | 2.13777600  |
| O | 2.27128200  | -2.00665600 | 1.61679200  |
| N | 1.88606900  | -0.19647100 | -0.06433900 |
| C | 1.94116300  | 1.19465600  | -0.40501700 |
| C | 0.98176900  | 2.11833000  | 0.06916800  |
| C | -0.22530700 | 1.76084400  | 0.87658100  |
| C | -1.51176600 | 2.43161500  | 0.50937500  |

|   |             |             |             |
|---|-------------|-------------|-------------|
| C | -0.21570100 | 0.88789700  | 1.89831900  |
| H | -1.14312000 | 0.65138100  | 2.42586400  |
| C | 2.97068700  | 1.61934900  | -1.25563100 |
| H | 3.67190000  | 0.87362900  | -1.63688900 |
| C | 1.14613600  | 3.46461300  | -0.30464500 |
| H | 0.42066000  | 4.19678700  | 0.05440900  |
| C | -0.87959300 | -0.65775500 | -1.40864900 |
| H | -0.51781400 | 0.36433300  | -1.54981600 |
| C | 0.11580800  | -1.68664200 | -0.98263600 |
| H | -0.01020000 | -2.60271600 | -1.58429500 |
| H | -0.07121900 | -1.97846400 | 0.06772100  |
| C | 4.45781100  | -1.04622500 | 0.55182900  |
| C | -2.42581800 | 2.79928300  | 1.50830600  |
| H | -2.15107100 | 2.67277100  | 2.55718700  |
| C | 1.55598700  | -1.20116800 | -1.08874800 |
| H | 1.74516300  | -0.75437100 | -2.07630500 |
| H | 2.24072600  | -2.05499000 | -0.98992200 |
| C | 5.38119900  | 0.00176000  | 0.50052000  |
| H | 5.11200100  | 0.98810500  | 0.88160100  |
| C | -1.86982300 | 2.65061700  | -0.83049900 |
| H | -1.16597600 | 2.40409500  | -1.62863200 |
| C | 3.10705100  | 2.95657500  | -1.61107800 |
| C | -3.67403600 | 3.32474100  | 1.18038000  |
| H | -4.36899500 | 3.60194700  | 1.97506600  |
| C | 2.19440600  | 3.88712900  | -1.11490000 |
| H | 2.28921900  | 4.94376000  | -1.37008700 |
| C | -2.23285700 | -0.90577700 | -1.53652300 |
| H | -2.86669500 | -0.14922400 | -2.00500200 |
| H | -2.56916900 | -1.94315800 | -1.62716200 |
| C | 4.78701900  | -2.32510000 | 0.10711900  |

|    |             |             |             |
|----|-------------|-------------|-------------|
| H  | 4.06523100  | -3.13875900 | 0.19352600  |
| C  | 6.64247300  | -0.24150700 | -0.03015300 |
| H  | 7.37292100  | 0.56951700  | -0.07266500 |
| C  | -4.03269000 | 3.49965500  | -0.15630800 |
| H  | -5.01158800 | 3.90717600  | -0.41508800 |
| C  | -7.20424200 | -2.83971100 | -0.81559600 |
| C  | -3.12199400 | 3.16660300  | -1.16055400 |
| H  | -3.38632000 | 3.31161300  | -2.20974500 |
| C  | -4.85608400 | -1.57591400 | 0.04744000  |
| C  | -5.88878400 | -0.82863800 | -0.53901800 |
| H  | -5.77053800 | 0.25096700  | -0.65367600 |
| C  | -7.05590300 | -1.45981200 | -0.96775400 |
| H  | -7.85429600 | -0.86975300 | -1.42156500 |
| C  | 6.99825200  | -1.51503500 | -0.50302500 |
| C  | 6.05731300  | -2.54828100 | -0.42202700 |
| H  | 6.32550200  | -3.54764900 | -0.77030500 |
| C  | 8.37202300  | -1.75543900 | -1.06365200 |
| H  | 9.13739500  | -1.60341000 | -0.28765500 |
| H  | 8.47201000  | -2.77713900 | -1.45127000 |
| H  | 8.58993000  | -1.04867300 | -1.87766200 |
| C  | -6.17937500 | -3.58874800 | -0.23440800 |
| H  | -6.29082900 | -4.66781800 | -0.11273800 |
| C  | -5.00923200 | -2.96283700 | 0.19408300  |
| H  | -4.20724700 | -3.54782400 | 0.64845700  |
| H  | 3.92080900  | 3.26860000  | -2.26728900 |
| H  | 0.69808300  | 0.41991700  | 2.25530100  |
| Se | -3.25996700 | -0.70698500 | 0.62564300  |
| H  | -8.11911400 | -3.33188900 | -1.15019500 |

**SMD-UM06-2X/Def2-SVP**

Electronic Energy (0K) = -4202.170457

Electronic Energy (0K) + ZPE = -4201.636422

Enthalpy (298K) = -4201.602171

Free Energy (298K) = -4201.707075

### INT-1"

Number of imaginary frequencies: 0

|   |             |             |             |
|---|-------------|-------------|-------------|
| S | 2.81917100  | -0.71409100 | 1.22939100  |
| O | 2.94323000  | 0.39919200  | 2.16083900  |
| O | 2.26051900  | -1.98664700 | 1.66300500  |
| N | 1.85963400  | -0.18742300 | -0.02748900 |
| C | 1.92238600  | 1.19936000  | -0.38481500 |
| C | 0.96981900  | 2.13408100  | 0.07946900  |
| C | -0.23474600 | 1.79121900  | 0.89561300  |
| C | -1.52534500 | 2.44169500  | 0.50923000  |
| C | -0.21470800 | 0.94462700  | 1.93885400  |
| H | -1.13816100 | 0.70944700  | 2.47333400  |
| C | 2.95213500  | 1.60841700  | -1.24316700 |
| H | 3.64861600  | 0.85487400  | -1.61757700 |
| C | 1.13927300  | 3.47473600  | -0.31144700 |
| H | 0.41753600  | 4.21441300  | 0.03994000  |
| C | -0.89838600 | -0.62699800 | -1.43256300 |
| H | -0.52980600 | 0.35335300  | -1.74003500 |
| C | 0.07417600  | -1.65490600 | -0.96753700 |
| H | -0.03924300 | -2.57510500 | -1.57201000 |
| H | -0.13947700 | -1.95545900 | 0.07618100  |
| C | 4.43827200  | -1.03479100 | 0.57425400  |
| C | -2.45804900 | 2.80185200  | 1.49357800  |
| H | -2.19517800 | 2.68853500  | 2.54693800  |
| C | 1.52415000  | -1.19619600 | -1.04660800 |
| H | 1.73929100  | -0.76479400 | -2.03608300 |

|   |             |             |             |
|---|-------------|-------------|-------------|
| H | 2.19019600  | -2.06157000 | -0.92529100 |
| C | 5.36383500  | 0.00750100  | 0.51987800  |
| H | 5.10092000  | 0.99464000  | 0.90319400  |
| C | -1.86969300 | 2.64596900  | -0.83643900 |
| H | -1.15133900 | 2.40505100  | -1.62255000 |
| C | 3.09456800  | 2.94042000  | -1.61538900 |
| C | -3.71083600 | 3.30297100  | 1.14589400  |
| H | -4.42034300 | 3.57444400  | 1.92968900  |
| C | 2.18760400  | 3.88195900  | -1.12932300 |
| H | 2.28712700  | 4.93475700  | -1.39827800 |
| C | -2.34048300 | -0.88081400 | -1.42804100 |
| H | -2.90383800 | -0.16972600 | -2.04382400 |
| H | -2.58416700 | -1.91392600 | -1.71728700 |
| C | 4.76065300  | -2.31609300 | 0.12320300  |
| H | 4.03564500  | -3.12674500 | 0.21144400  |
| C | 6.62379300  | -0.23928400 | -0.01987600 |
| H | 7.35543900  | 0.56988300  | -0.06606000 |
| C | -4.05522000 | 3.46277000  | -0.19674700 |
| H | -5.03747800 | 3.85165400  | -0.47106300 |
| C | -7.23571200 | -2.83822000 | -0.58948400 |
| C | -3.12550500 | 3.13947100  | -1.18639800 |
| H | -3.37818900 | 3.27330900  | -2.23993900 |
| C | -4.80458100 | -1.59624700 | 0.01823100  |
| C | -5.94511400 | -0.82419000 | -0.22912200 |
| H | -5.87837800 | 0.26484600  | -0.18681900 |
| C | -7.15803900 | -1.44643500 | -0.52905700 |
| H | -8.04486500 | -0.83908000 | -0.71916100 |
| C | 6.97133400  | -1.51040700 | -0.49639900 |
| C | 6.02426200  | -2.54192900 | -0.41313800 |
| H | 6.28673800  | -3.54130500 | -0.76699800 |

|    |             |             |             |
|----|-------------|-------------|-------------|
| C  | 8.33876700  | -1.78072500 | -1.05917500 |
| H  | 8.92625100  | -2.39615700 | -0.36041500 |
| H  | 8.27151400  | -2.33643600 | -2.00519600 |
| H  | 8.88902400  | -0.84788600 | -1.23642000 |
| C  | -6.09841700 | -3.61000200 | -0.34505200 |
| H  | -6.15548400 | -4.69922800 | -0.38772900 |
| C  | -4.88582100 | -2.99286900 | -0.03704200 |
| H  | -3.99767200 | -3.59517600 | 0.16543400  |
| H  | 3.90859600  | 3.23992600  | -2.27709200 |
| H  | 0.70590700  | 0.49518000  | 2.30267700  |
| Se | -3.13779800 | -0.73420800 | 0.43205600  |
| H  | -8.18447200 | -3.32322600 | -0.82583600 |

**SMD-UM06-2X/Def2-SVP**

Electronic Energy (0K) = -4202.1758349

Electronic Energy (0K) + ZPE = -4201.641637

Enthalpy (298K) = -4201.606857

Free Energy (298K) = -4201.714683

**TS<sub>2</sub>"**

Number of imaginary frequencies: 1

|   |             |             |             |
|---|-------------|-------------|-------------|
| S | 2.87597000  | -1.04514300 | 1.09706300  |
| O | 2.80267900  | -0.06896700 | 2.17406300  |
| O | 2.39237200  | -2.40558700 | 1.29787200  |
| N | 2.00875400  | -0.43143900 | -0.17673300 |
| C | 2.12442300  | 0.97106400  | -0.44021500 |
| C | 1.13923500  | 1.89665500  | -0.01314600 |
| C | -0.15427100 | 1.52933700  | 0.60497600  |
| C | -1.30896300 | 2.45411600  | 0.40810900  |
| C | -0.43627200 | 0.32626800  | 1.19273800  |
| H | -1.42809900 | 0.18100400  | 1.62795600  |

|   |             |             |             |
|---|-------------|-------------|-------------|
| C | 3.25103600  | 1.40430300  | -1.14894100 |
| H | 3.96006400  | 0.65283900  | -1.50249300 |
| C | 1.40650300  | 3.25946900  | -0.26362000 |
| H | 0.68670700  | 4.00402700  | 0.07816300  |
| C | -1.00936300 | -1.00673000 | -0.67856500 |
| H | -1.02252200 | -0.19557000 | -1.41650800 |
| C | 0.12413300  | -1.97859400 | -0.78695500 |
| H | -0.12149000 | -2.72611800 | -1.56794100 |
| H | 0.24056700  | -2.54627000 | 0.14950800  |
| C | 4.57149400  | -1.14981500 | 0.58588200  |
| C | -2.15614800 | 2.77538300  | 1.47883100  |
| H | -1.90788800 | 2.41570700  | 2.47980400  |
| C | 1.46559600  | -1.36143200 | -1.17644000 |
| H | 1.36245000  | -0.78765300 | -2.10852600 |
| H | 2.19586700  | -2.16214200 | -1.37252800 |
| C | 5.44060200  | -0.10230800 | 0.88346700  |
| H | 5.08796700  | 0.75145700  | 1.46397400  |
| C | -1.63914100 | 2.93519500  | -0.87062700 |
| H | -0.99342800 | 2.69426200  | -1.71859100 |
| C | 3.47546000  | 2.75482900  | -1.39742000 |
| C | -3.30411000 | 3.54152300  | 1.27854400  |
| H | -3.94910400 | 3.78116500  | 2.12602300  |
| C | 2.55086900  | 3.68697100  | -0.92688900 |
| H | 2.71317500  | 4.75421200  | -1.08701700 |
| C | -2.33924700 | -1.56425600 | -0.29993200 |
| H | -2.71894900 | -2.23704100 | -1.08954500 |
| H | -2.28533300 | -2.14224100 | 0.63510200  |
| C | 4.99621500  | -2.26422400 | -0.14072300 |
| H | 4.30811800  | -3.08861900 | -0.33456100 |
| C | 6.75582700  | -0.16947600 | 0.42813000  |



|    |             |             |             |
|----|-------------|-------------|-------------|
| H  | 7.44498500  | 0.64591800  | 0.65674200  |
| C  | -3.62825900 | 3.99938300  | 0.00128100  |
| H  | -4.52936300 | 4.59438500  | -0.15741200 |
| C  | -7.53693800 | -2.90498900 | -0.19715900 |
| C  | -2.78924300 | 3.69491300  | -1.07284400 |
| H  | -3.03683000 | 4.04456900  | -2.07686800 |
| C  | -5.24914100 | -1.29693500 | -0.13888200 |
| C  | -5.54750500 | -2.05304900 | -1.27864100 |
| H  | -4.89304800 | -2.00401100 | -2.15190000 |
| C  | -6.68256300 | -2.86267900 | -1.30093800 |
| H  | -6.90687600 | -3.45401200 | -2.19058900 |
| C  | 7.20876200  | -1.26622500 | -0.31610400 |
| C  | 6.31161200  | -2.31067800 | -0.58966600 |
| H  | 6.65571400  | -3.17806600 | -1.15733600 |
| C  | 8.63122600  | -1.34615600 | -0.79600900 |
| H  | 9.17786500  | -2.12970400 | -0.24904800 |
| H  | 8.67094300  | -1.60659500 | -1.86338000 |
| H  | 9.15754000  | -0.39483400 | -0.64630700 |
| C  | -7.24858100 | -2.14022500 | 0.93273900  |
| H  | -7.91231900 | -2.16880400 | 1.79882500  |
| C  | -6.10348200 | -1.34191200 | 0.96705000  |
| H  | -5.86859900 | -0.75563500 | 1.85735000  |
| H  | 4.36378800  | 3.07309200  | -1.94474600 |
| H  | 0.33334200  | -0.37515200 | 1.49930300  |
| Se | -3.70330200 | -0.15371000 | -0.09345200 |
| H  | -8.42878900 | -3.53360500 | -0.21965500 |

**SMD-UM06-2X/Def2-SVP**

Electronic Energy (0K) = -4202.1611037

Electronic Energy (0K) + ZPE = -4201.626352

Enthalpy (298K) = -4201.592832

Free Energy (298K) = -4201.695748

**INT-2"**

Number of imaginary frequencies: 0

|   |             |             |             |
|---|-------------|-------------|-------------|
| S | 2.79496400  | -1.26440400 | 0.91137300  |
| O | 2.57816100  | -0.43514200 | 2.08987400  |
| O | 2.36046500  | -2.65587400 | 0.89926800  |
| N | 2.03729100  | -0.53641700 | -0.36984400 |
| C | 2.20163100  | 0.87330500  | -0.53863300 |
| C | 1.17805600  | 1.80320700  | -0.17246600 |
| C | -0.11704300 | 1.44476300  | 0.34349400  |
| C | -1.21407700 | 2.44201000  | 0.33832100  |
| C | -0.55465200 | 0.05399400  | 0.71471600  |
| H | -1.40357100 | 0.14932300  | 1.40705600  |
| C | 3.39486000  | 1.31553700  | -1.11434600 |
| H | 4.12407500  | 0.56607100  | -1.42740900 |
| C | 1.49892100  | 3.18011000  | -0.35386500 |
| H | 0.77265700  | 3.93021000  | -0.04212800 |
| C | -1.03036800 | -0.75967100 | -0.53192500 |
| H | -1.12482400 | -0.06610400 | -1.38699100 |
| C | -0.03605100 | -1.85695700 | -0.92151700 |
| H | -0.45229300 | -2.44040400 | -1.75831300 |
| H | 0.09301200  | -2.54895100 | -0.07508800 |
| C | 4.53597000  | -1.23826900 | 0.56999500  |
| C | -1.97914700 | 2.66939700  | 1.49515900  |
| H | -1.71385800 | 2.15523800  | 2.42187000  |
| C | 1.33264100  | -1.35491700 | -1.36760300 |
| H | 1.23328300  | -0.71738500 | -2.25793600 |
| H | 1.96445000  | -2.21036900 | -1.65040000 |
| C | 5.33359300  | -0.25298800 | 1.14441700  |

|   |             |             |             |
|---|-------------|-------------|-------------|
| H | 4.89385900  | 0.47331600  | 1.82927100  |
| C | -1.58077900 | 3.11119100  | -0.84336400 |
| H | -1.00633500 | 2.93734100  | -1.75630900 |
| C | 3.66321100  | 2.67078200  | -1.29379000 |
| C | -3.06396400 | 3.54299700  | 1.47549200  |
| H | -3.63829500 | 3.71234400  | 2.38811200  |
| C | 2.70451800  | 3.60374200  | -0.88822100 |
| H | 2.89782100  | 4.67270200  | -0.99371100 |
| C | -2.40054600 | -1.39414300 | -0.30400600 |
| H | -2.67507200 | -2.02846300 | -1.15698500 |
| H | -2.40818000 | -2.00402100 | 0.61123100  |
| C | 5.06664800  | -2.18914500 | -0.30412600 |
| H | 4.42871000  | -2.96834000 | -0.72512400 |
| C | 6.68987100  | -0.21399900 | 0.82420400  |
| H | 7.32467400  | 0.55476700  | 1.26919500  |
| C | -3.42156700 | 4.19234600  | 0.29265200  |
| H | -4.27933300 | 4.86689900  | 0.27415100  |
| C | -7.52593600 | -2.95014800 | -0.04996300 |
| C | -2.67678400 | 3.97157700  | -0.86695900 |
| H | -2.95423900 | 4.46767900  | -1.79884300 |
| C | -5.31229000 | -1.24002000 | -0.10102700 |
| C | -5.55187800 | -2.11175700 | -1.16988100 |
| H | -4.88201800 | -2.11459300 | -2.03259900 |
| C | -6.64958300 | -2.97092900 | -1.13686500 |
| H | -6.82689200 | -3.65236800 | -1.97094300 |
| C | 7.25098700  | -1.14484700 | -0.05805900 |
| C | 6.42047800  | -2.13187800 | -0.61391100 |
| H | 6.84864500  | -2.87092300 | -1.29477600 |
| C | 8.71498200  | -1.11158100 | -0.39781200 |
| H | 9.21901000  | -2.01388800 | -0.01950000 |

|    |             |             |             |
|----|-------------|-------------|-------------|
| H  | 8.86317800  | -1.08944300 | -1.48729400 |
| H  | 9.20668700  | -0.23394600 | 0.04061900  |
| C  | -7.29693400 | -2.07062800 | 1.00778800  |
| H  | -7.97772300 | -2.04928300 | 1.86076500  |
| C  | -6.18873600 | -1.22146500 | 0.98848000  |
| H  | -5.99961200 | -0.54602800 | 1.82488000  |
| H  | 4.60574100  | 2.99114000  | -1.73920300 |
| H  | 0.22530900  | -0.49264400 | 1.25502400  |
| Se | -3.81694800 | -0.03139300 | -0.13186700 |
| H  | -8.38829400 | -3.61869900 | -0.02963800 |

### SMD-UM06-2X/Def2-SVP

Electronic Energy (0K) = -4202.2177675

Electronic Energy (0K) + ZPE = -4201.678484

Enthalpy (298K) = -4201.645382

Free Energy (298K) = -4201.747789

### TS<sub>2</sub><sup>'''</sup>

Number of imaginary frequencies: 1

|   |             |             |             |
|---|-------------|-------------|-------------|
| C | 0.56008700  | -2.99534200 | -2.29037400 |
| C | -0.06574900 | -1.76157200 | -2.23444500 |
| C | 0.40476500  | -0.77718700 | -1.32264200 |
| C | 1.65070000  | -1.00049100 | -0.66802200 |
| C | 2.25437600  | -2.25927000 | -0.69159600 |
| C | 1.69380300  | -3.25831900 | -1.50936300 |
| C | 3.40407300  | -2.58157700 | 0.20677300  |
| C | 3.31978700  | -3.65386400 | 1.01052700  |
| N | 2.08432000  | -0.03634200 | 0.28737900  |
| C | 1.34011000  | -0.06584800 | 1.55248800  |
| C | -0.16707200 | 0.10052800  | 1.35286600  |
| C | -0.77571900 | -0.92525700 | 0.43618100  |

|   |             |             |             |
|---|-------------|-------------|-------------|
| C | -2.15938200 | -0.68414300 | -0.06200600 |
| C | 4.62170500  | -1.72473900 | 0.18772800  |
| C | 5.09778300  | -1.18849700 | -1.01525700 |
| C | 6.27602700  | -0.44324300 | -1.04241800 |
| C | 6.98961100  | -0.21304500 | 0.13316500  |
| C | 6.51368300  | -0.72730900 | 1.34100500  |
| C | 5.33778000  | -1.47305000 | 1.36785400  |
| C | 1.52558300  | 2.62714700  | -0.26510700 |
| C | 1.22603300  | 3.37568600  | 0.87409100  |
| C | 0.17502000  | 4.28581300  | 0.82312400  |
| C | -0.57162200 | 4.46758400  | -0.35091800 |
| C | -0.22743800 | 3.72339500  | -1.48696000 |
| C | 0.81996500  | 2.80504000  | -1.45331500 |
| C | -1.71369600 | 5.44475500  | -0.37722100 |
| S | 2.80027500  | 1.38559400  | -0.19629800 |
| O | 3.70841000  | 1.78261200  | 0.86854900  |
| O | 3.27270700  | 1.16402500  | -1.55510400 |
| H | 0.17770400  | -3.76993700 | -2.95799100 |
| H | -0.94046300 | -1.55075500 | -2.85193100 |
| H | 0.05621500  | 0.25326800  | -1.43150300 |
| H | 2.17359800  | -4.23746100 | -1.54995700 |
| H | 4.15287500  | -3.94587700 | 1.65458600  |
| H | 2.41641600  | -4.26817700 | 1.03935300  |
| H | 1.73982700  | 0.71743500  | 2.21155000  |
| H | 1.55422300  | -1.03448300 | 2.03344800  |
| H | -0.64679300 | 0.03031500  | 2.34683800  |
| H | -0.39914200 | 1.11113600  | 0.97638200  |
| H | -0.55867100 | -1.97149300 | 0.68276800  |
| H | -2.49637300 | -1.47085700 | -0.75279700 |
| H | -2.28545200 | 0.30703900  | -0.52669700 |

|   |             |             |             |
|---|-------------|-------------|-------------|
| H | 4.54031500  | -1.35559300 | -1.93871400 |
| H | 6.63520300  | -0.03614700 | -1.98952400 |
| H | 7.90831100  | 0.37603600  | 0.11174900  |
| H | 7.05523700  | -0.53582400 | 2.26930300  |
| H | 4.95732800  | -1.85496000 | 2.31771300  |
| H | 1.81260200  | 3.24744500  | 1.78536900  |
| H | -0.07095900 | 4.87413300  | 1.71017600  |
| H | -0.78214100 | 3.87169800  | -2.41581500 |
| H | 1.09453700  | 2.23536100  | -2.34284500 |
| H | -2.13229300 | 5.54454500  | -1.38684800 |
| H | -2.51767200 | 5.11663600  | 0.29908300  |
| H | -1.38668000 | 6.43743400  | -0.03512200 |
| C | -4.94882200 | -0.73602100 | 0.55890500  |
| C | -5.54305200 | -1.96227200 | 0.25895700  |
| C | -6.79708200 | -1.96749500 | -0.34106300 |
| C | -7.46194000 | -0.76772500 | -0.64118300 |
| C | -6.83883500 | 0.44553300  | -0.32335800 |
| C | -5.58285800 | 0.47165700  | 0.27946700  |
| C | -8.81551700 | -0.79934300 | -1.29464500 |
| S | -3.34016300 | -0.71180400 | 1.31764500  |
| O | -3.14632000 | -1.97683700 | 2.03031100  |
| O | -3.20949800 | 0.54980900  | 2.05359200  |
| H | -5.03036800 | -2.89330300 | 0.50739200  |
| H | -7.27910900 | -2.91942500 | -0.57534200 |
| H | -7.35022800 | 1.38495300  | -0.54279800 |
| H | -5.10301500 | 1.41566500  | 0.54358800  |
| H | -9.51750300 | -1.40970800 | -0.70795900 |
| H | -9.23396000 | 0.20987300  | -1.39884700 |
| H | -8.75065900 | -1.25126000 | -2.29604800 |

**SMD-UM06-2X/Def2-SVP**

Electronic Energy (0K) = -2388.4071295

Electronic Energy (0K) + ZPE = -2387.833857

Enthalpy (298K) = -2387.797889

Free Energy (298K) = -2387.902825

### INT-2'''

Number of imaginary frequencies: 0

|   |             |             |             |
|---|-------------|-------------|-------------|
| C | -0.63773500 | -3.29282300 | 1.82993500  |
| C | 0.12804300  | -2.16926100 | 1.75497200  |
| C | -0.24908400 | -1.02062900 | 0.87409900  |
| C | -1.65138200 | -1.12751100 | 0.35141600  |
| C | -2.37211700 | -2.30173500 | 0.38144300  |
| C | -1.86203300 | -3.40369600 | 1.11660100  |
| C | -3.62731800 | -2.47516700 | -0.41658000 |
| C | -3.68094800 | -3.47100900 | -1.31465100 |
| N | -2.07980600 | -0.03830300 | -0.45883200 |
| C | -1.24747700 | 0.12913200  | -1.66022500 |
| C | 0.23754600  | 0.23208700  | -1.31537100 |
| C | 0.71084600  | -0.88011300 | -0.36816300 |
| C | 2.13402600  | -0.64975500 | 0.13729600  |
| C | -4.78990500 | -1.57826800 | -0.17966700 |
| C | -5.07363900 | -1.11101800 | 1.10961200  |
| C | -6.19723600 | -0.32052300 | 1.34770300  |
| C | -7.05121800 | 0.01972800  | 0.29945100  |
| C | -6.77229500 | -0.43199200 | -0.99262400 |
| C | -5.65011400 | -1.22136800 | -1.23028000 |
| C | -1.39378900 | 2.53988700  | 0.34417600  |
| C | -1.17464500 | 3.38708000  | -0.74124500 |
| C | -0.06602200 | 4.22863600  | -0.72559100 |
| C | 0.81887900  | 4.24044800  | 0.36231100  |

|   |             |             |             |
|---|-------------|-------------|-------------|
| C | 0.54043000  | 3.41690400  | 1.46297600  |
| C | -0.56124500 | 2.56571900  | 1.46248700  |
| C | 2.05012000  | 5.10165700  | 0.33782200  |
| S | -2.70555400 | 1.34048200  | 0.26687900  |
| O | -3.70583100 | 1.87690700  | -0.64201000 |
| O | -3.04298300 | 0.96569600  | 1.63320600  |
| H | -0.31560000 | -4.12767000 | 2.45567400  |
| H | 1.05406700  | -2.09823300 | 2.32917500  |
| H | -0.14271200 | -0.07126900 | 1.43389600  |
| H | -2.44128800 | -4.32621300 | 1.15770700  |
| H | -4.58684000 | -3.66675500 | -1.89322800 |
| H | -2.81864400 | -4.11937200 | -1.48841700 |
| H | -1.59308400 | 1.01133500  | -2.21753300 |
| H | -1.43474800 | -0.74838300 | -2.29783300 |
| H | 0.81302500  | 0.18139700  | -2.25084100 |
| H | 0.46159400  | 1.20958400  | -0.86107600 |
| H | 0.68414400  | -1.84347900 | -0.90323600 |
| H | 2.52439100  | -1.53459400 | 0.65840800  |
| H | 2.20528100  | 0.22588200  | 0.80131500  |
| H | -4.40241100 | -1.36142200 | 1.93247600  |
| H | -6.40166300 | 0.03591200  | 2.35892200  |
| H | -7.92716600 | 0.64390600  | 0.48521700  |
| H | -7.42631800 | -0.15673600 | -1.82208400 |
| H | -5.42296800 | -1.55080000 | -2.24612000 |
| H | -1.86298300 | 3.38162000  | -1.58803800 |
| H | 0.11999600  | 4.88850800  | -1.57550700 |
| H | 1.19851200  | 3.44427400  | 2.33415300  |
| H | -0.77950400 | 1.92898500  | 2.32161900  |
| H | 2.38686700  | 5.34699800  | 1.35361200  |
| H | 2.86974400  | 4.56681100  | -0.16830800 |



|   |            |             |             |
|---|------------|-------------|-------------|
| H | 1.87365300 | 6.03411300  | -0.21482700 |
| C | 4.89063900 | -0.62194600 | -0.47990200 |
| C | 5.43574600 | -1.90558300 | -0.52514200 |
| C | 6.68303500 | -2.12227200 | 0.04903700  |
| C | 7.38989600 | -1.07554200 | 0.66271700  |
| C | 6.81725700 | 0.20225700  | 0.68407500  |
| C | 5.56803100 | 0.43975200  | 0.11289000  |
| C | 8.73921200 | -1.33420700 | 1.27287000  |
| S | 3.29134200 | -0.33477000 | -1.20302300 |
| O | 3.06531600 | -1.35551600 | -2.23079500 |
| O | 3.21629400 | 1.08204300  | -1.57123700 |
| H | 4.89019100 | -2.71432700 | -1.01440500 |
| H | 7.12442600 | -3.12092300 | 0.01814900  |
| H | 7.36090600 | 1.02607600  | 1.15079000  |
| H | 5.12735400 | 1.43813000  | 0.11608000  |
| H | 9.44820400 | -1.68562400 | 0.50839700  |
| H | 9.14996300 | -0.42789800 | 1.73537500  |
| H | 8.67428500 | -2.11934500 | 2.04062000  |

**SMD-UM06-2X/Def2-SVP**

Electronic Energy (0K) = -2388.4322566

Electronic Energy (0K) + ZPE = -2387.857614

Enthalpy (298K) = -2387.821210

Free Energy (298K) = -2387.929980

**8. NMR Spectra of Products**

### Compound 3a

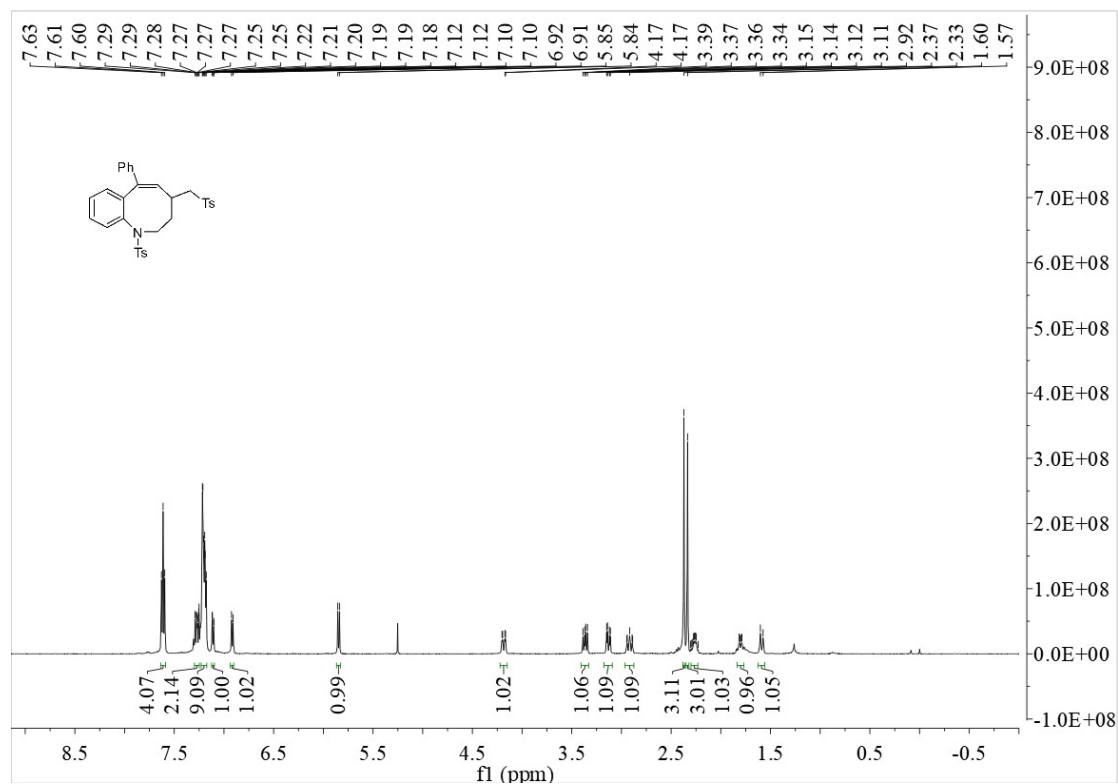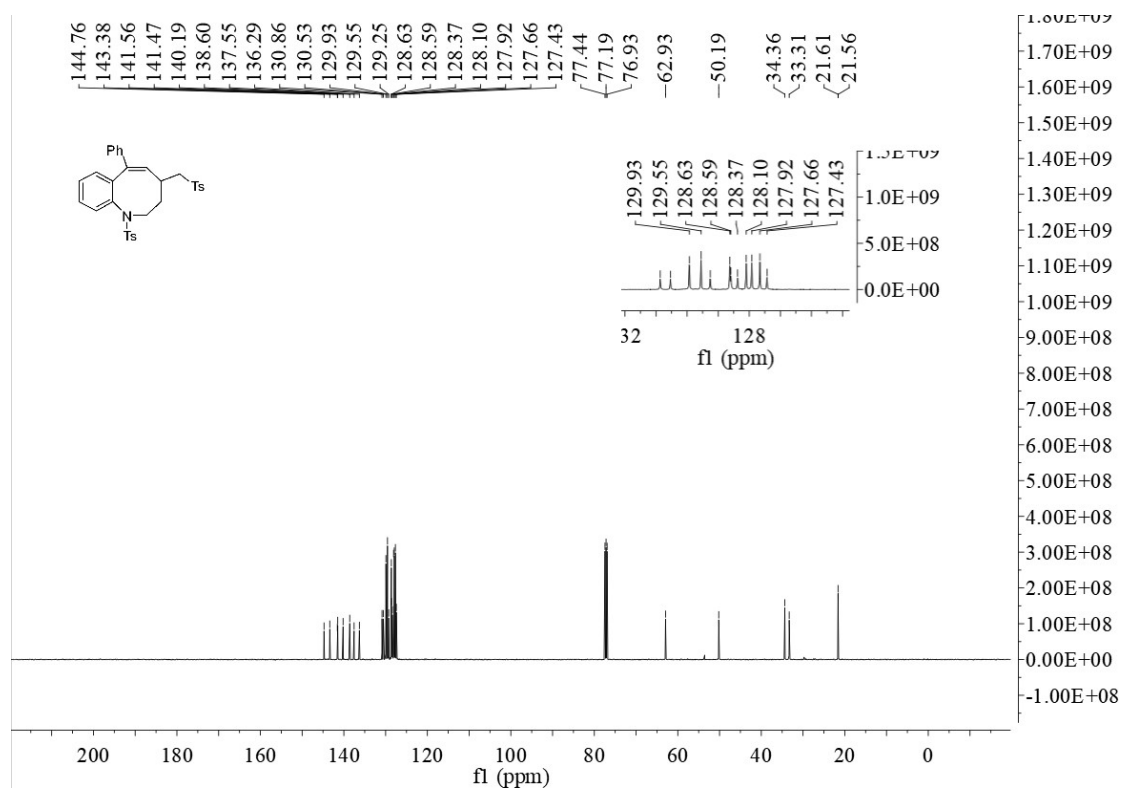

### Compound 3b

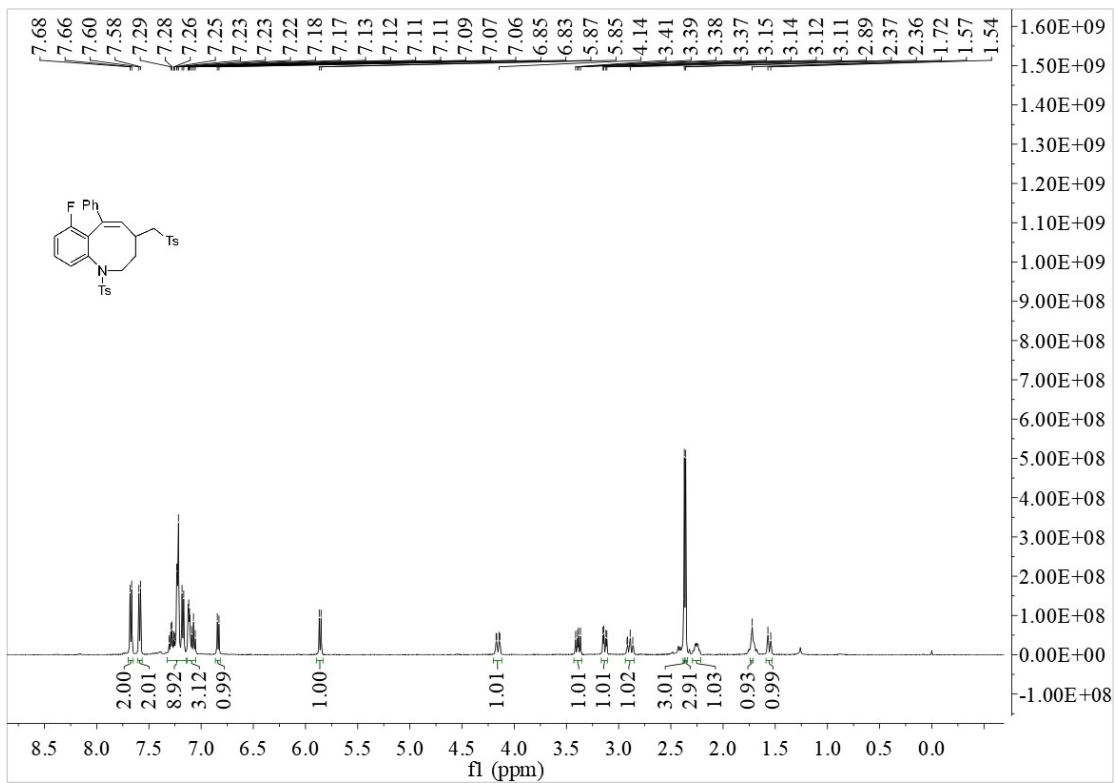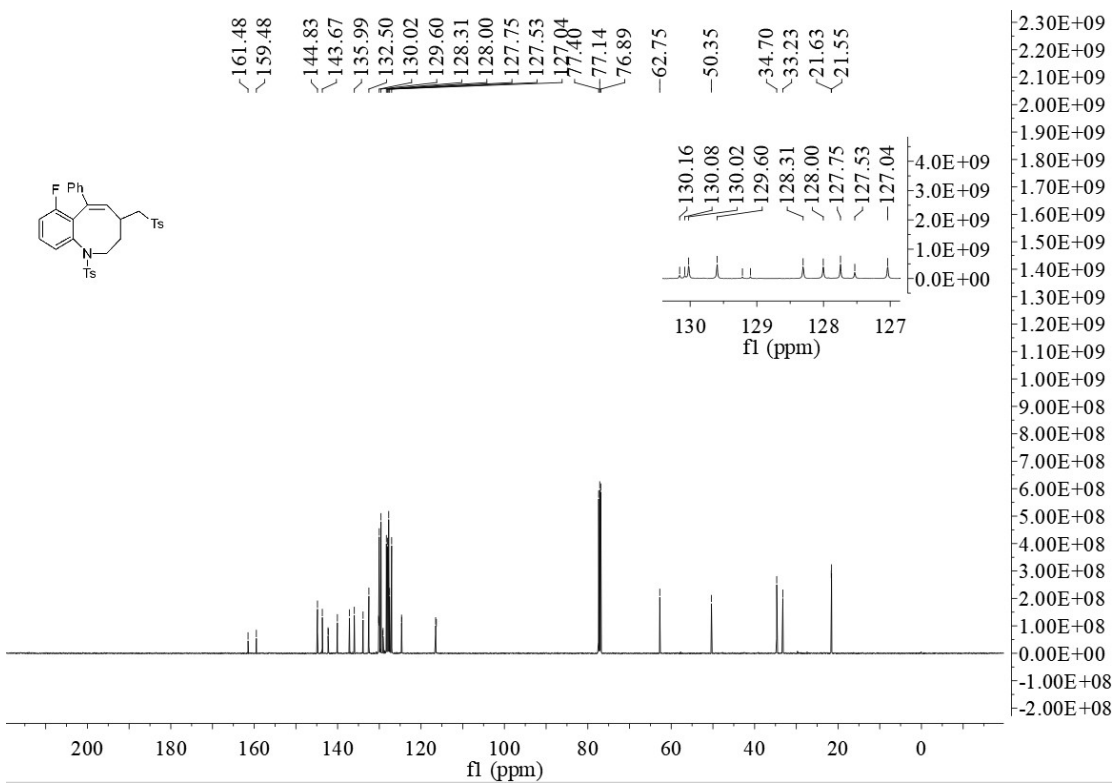

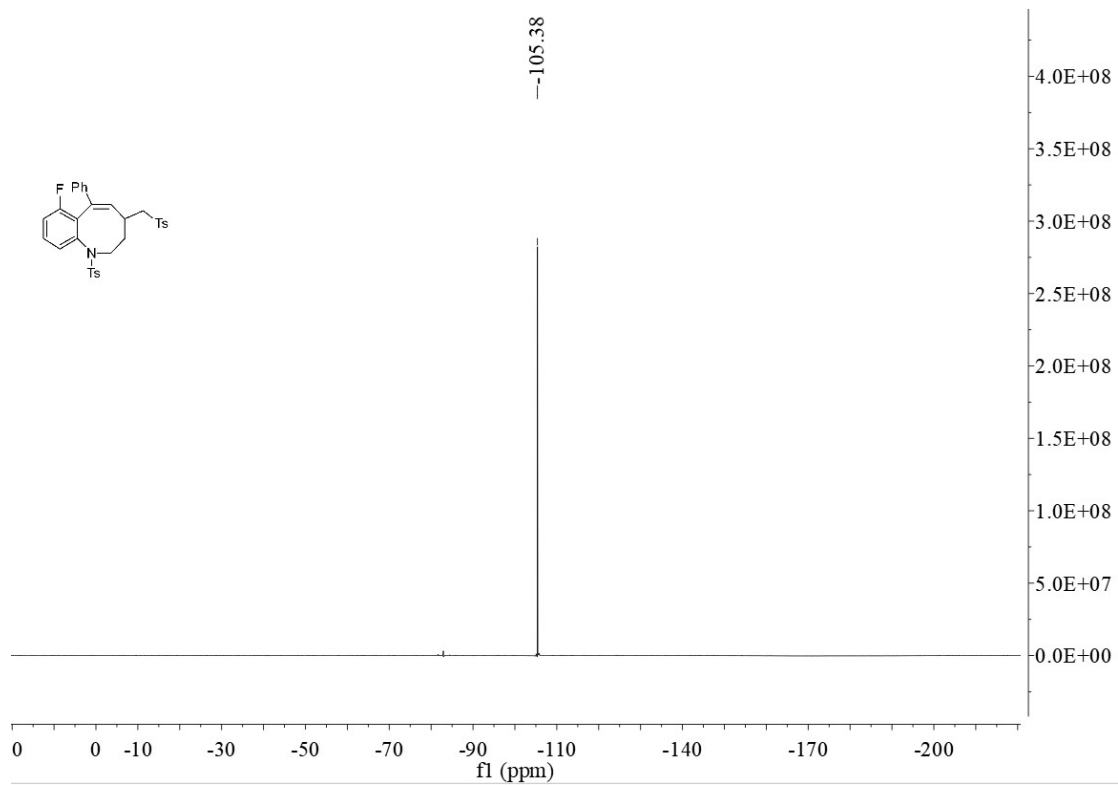

### Compound 3c

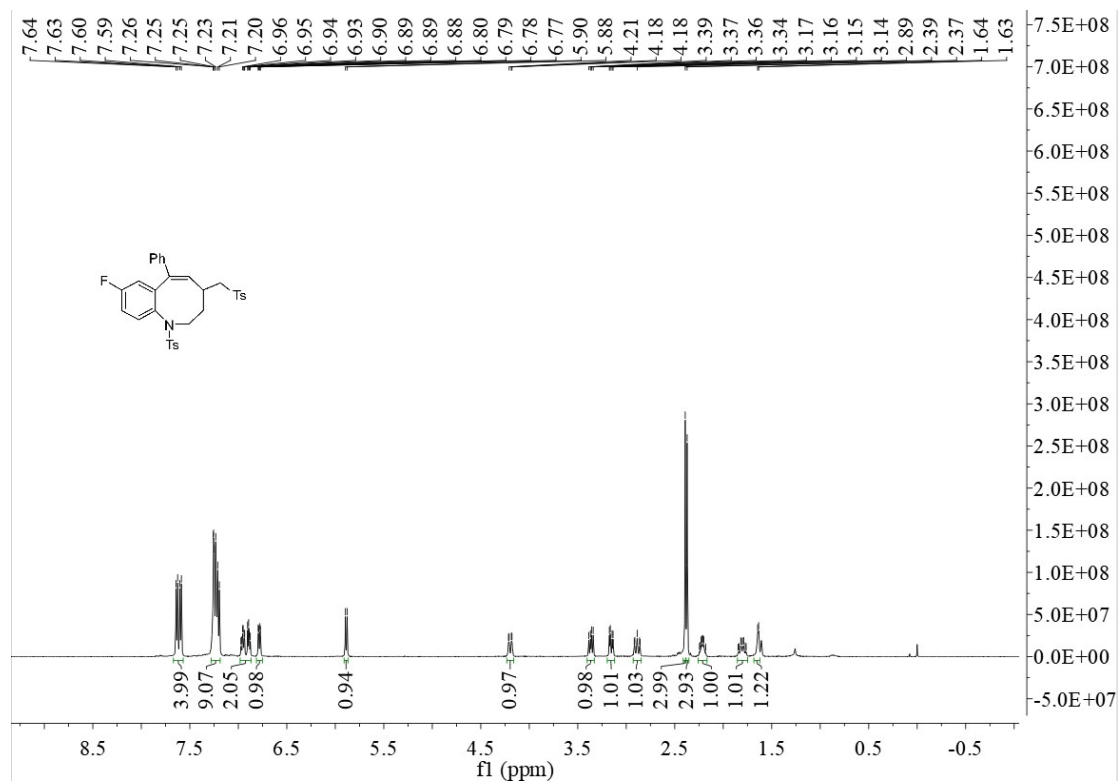

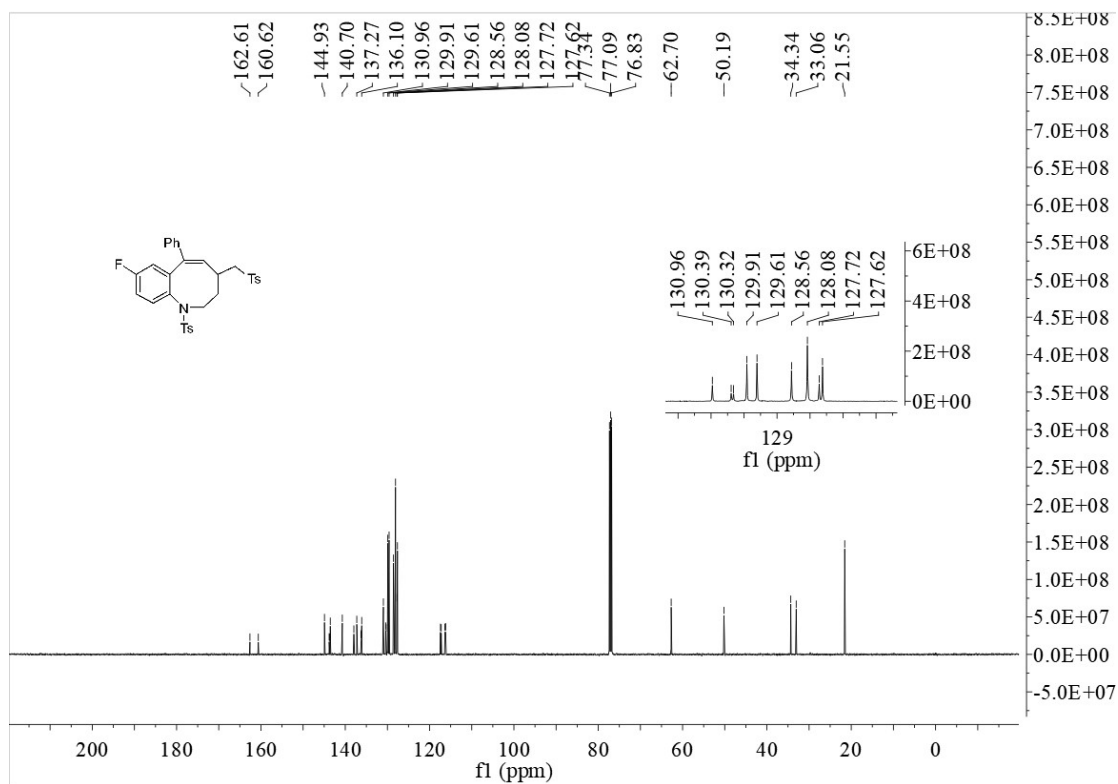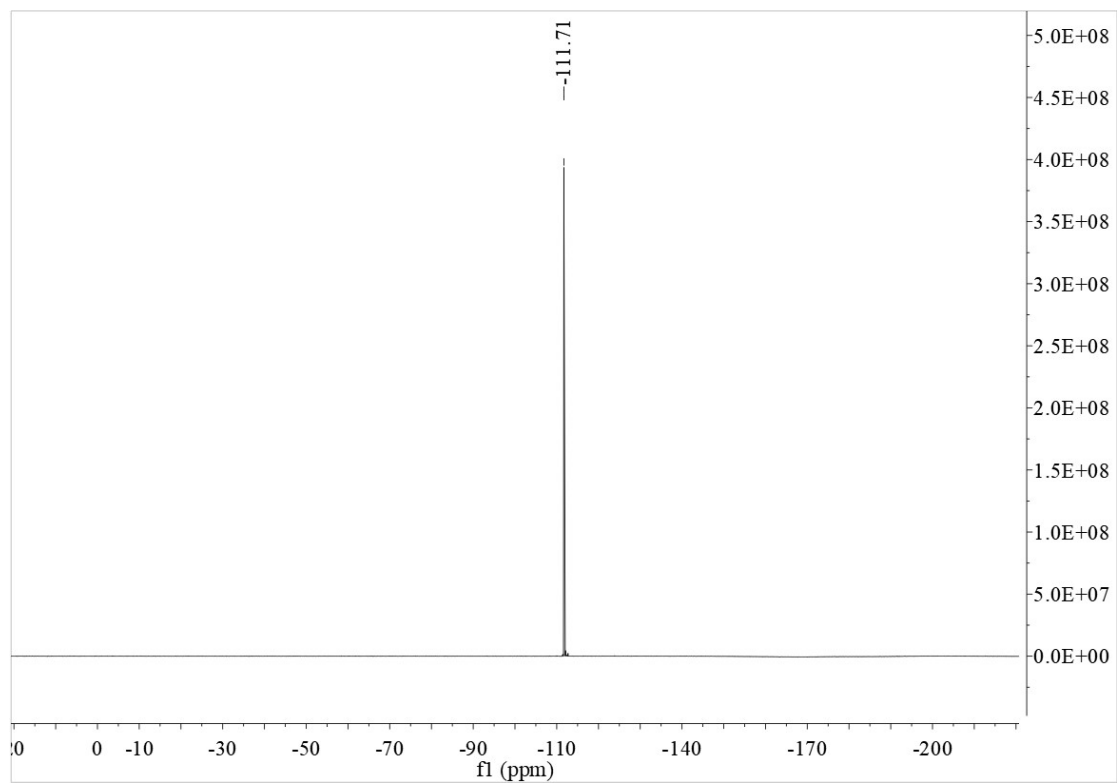

# Compound 3d

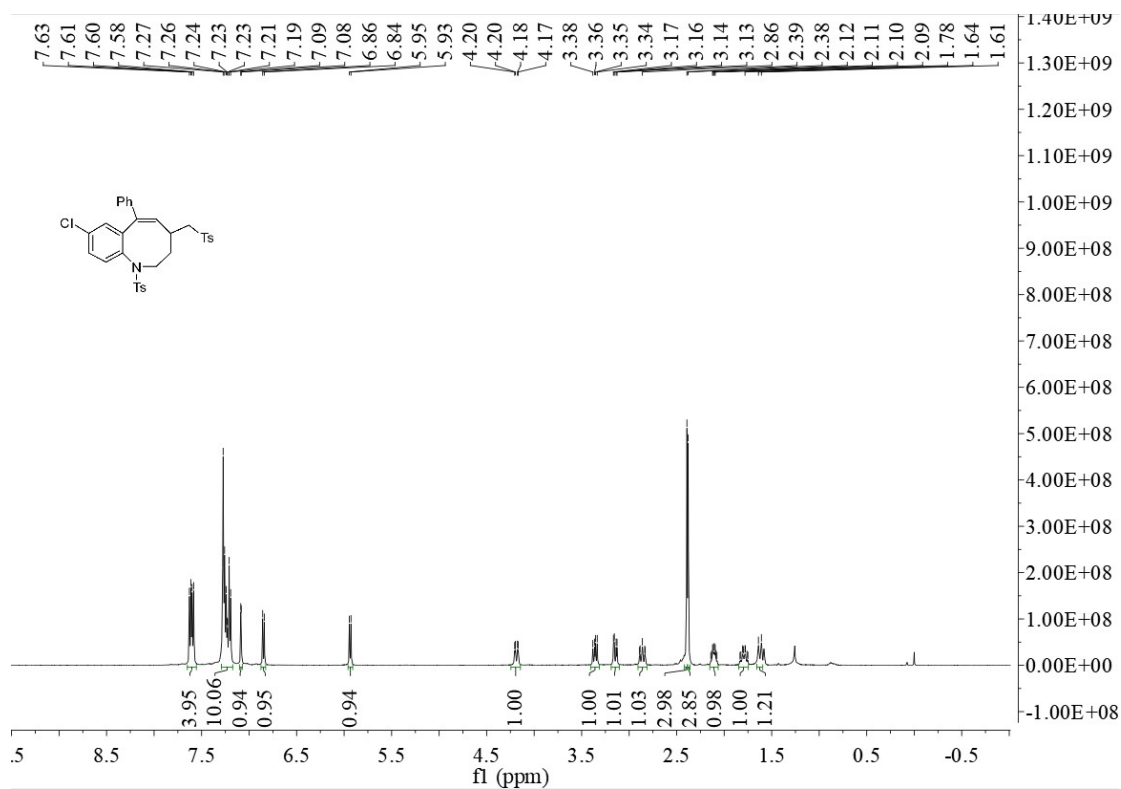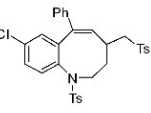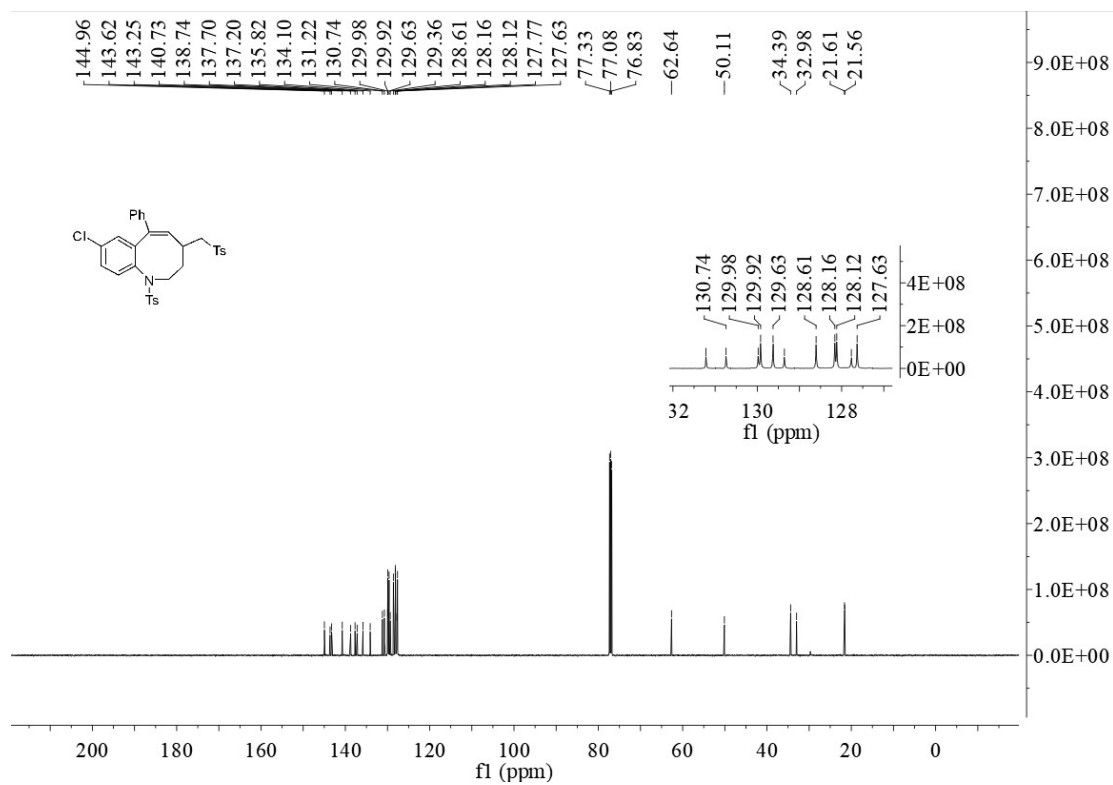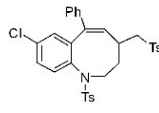

# Compound 3e

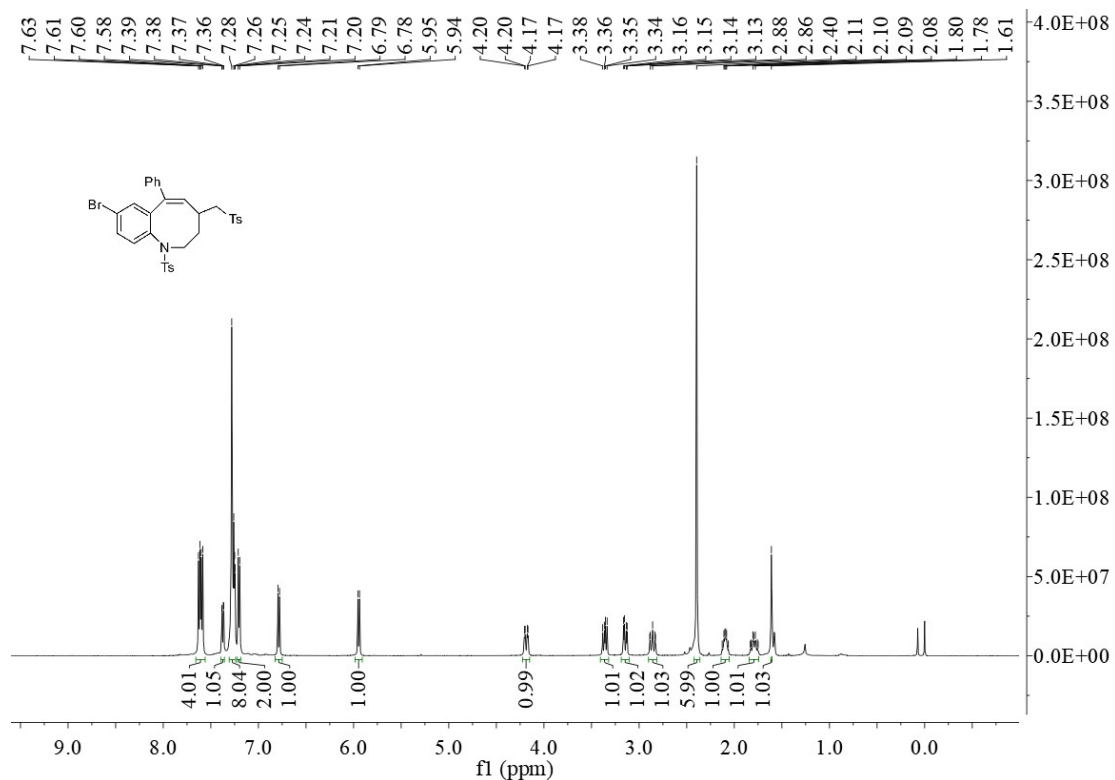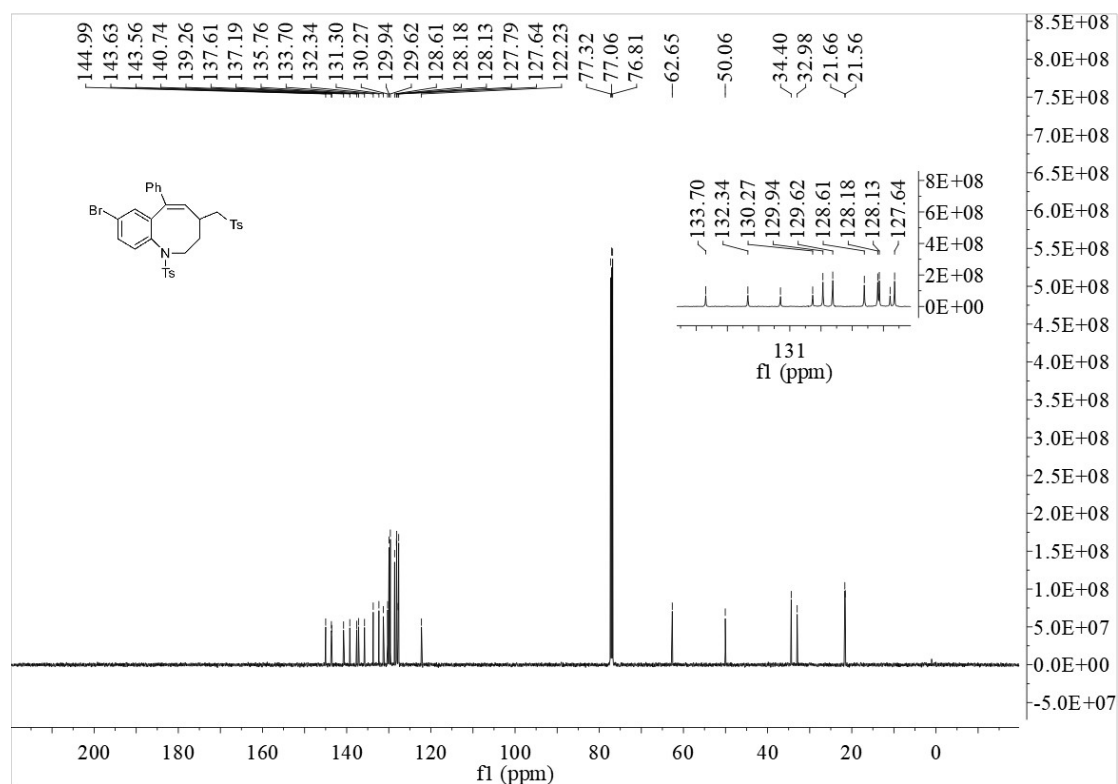

# Compound 3f

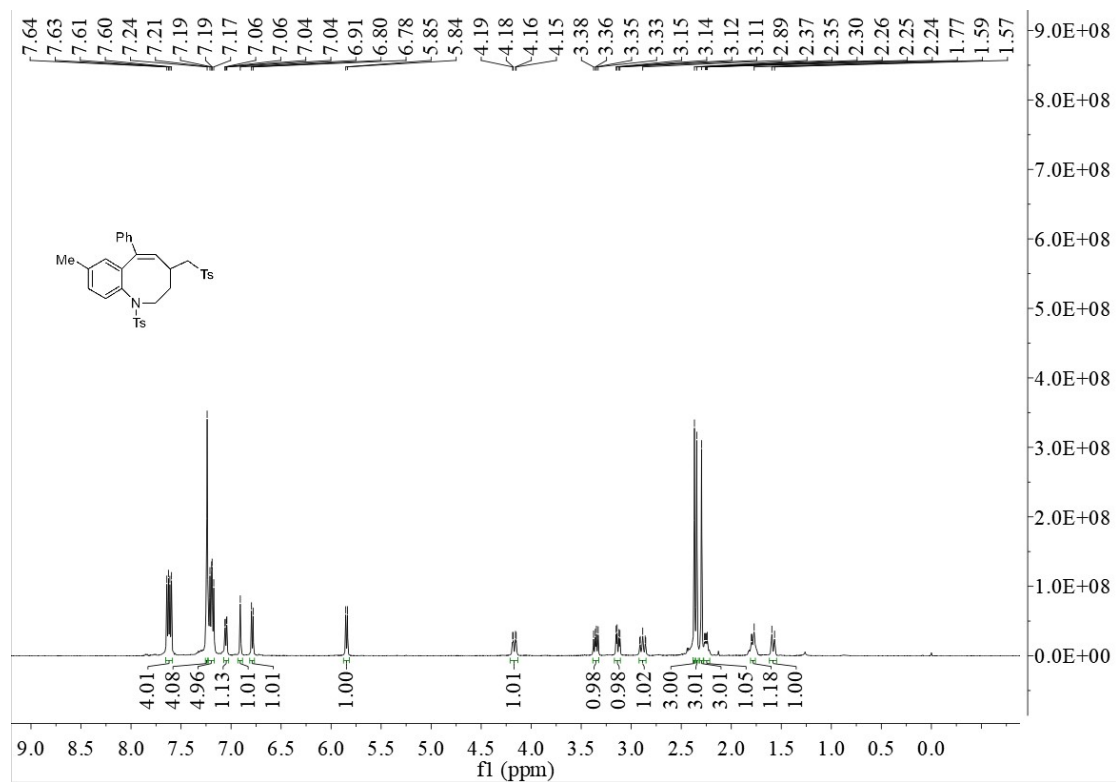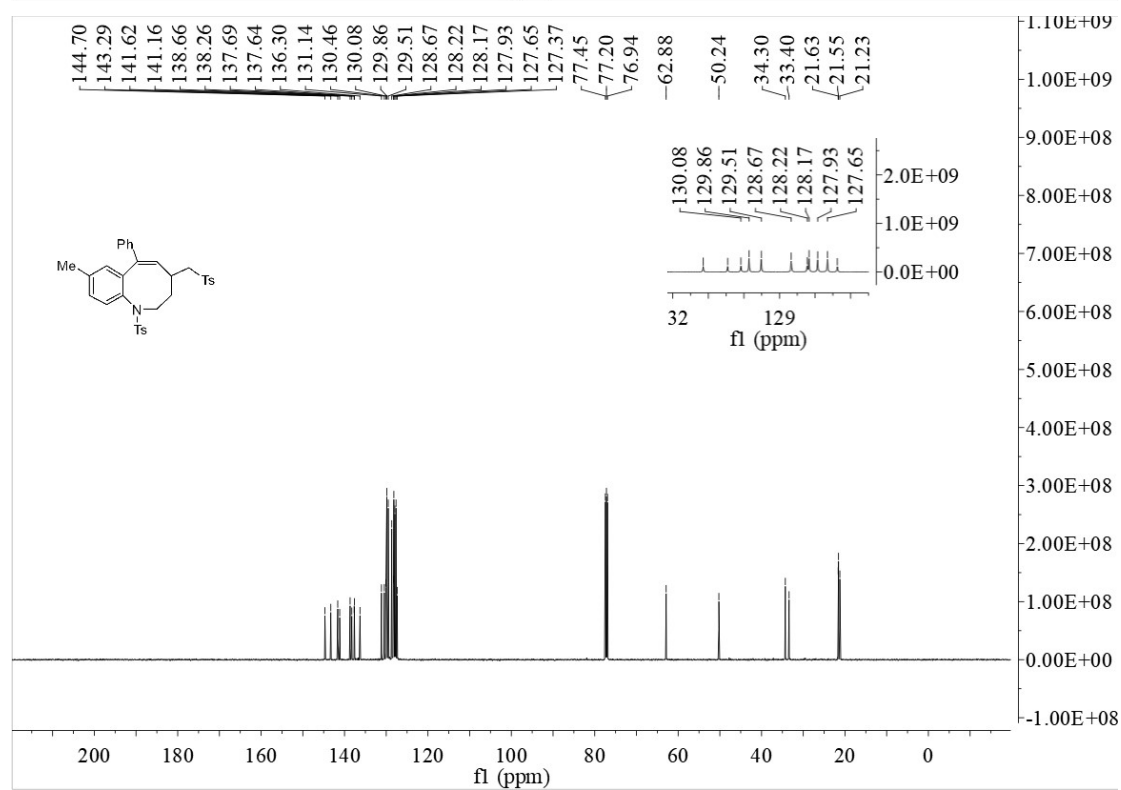



# Compound 3g

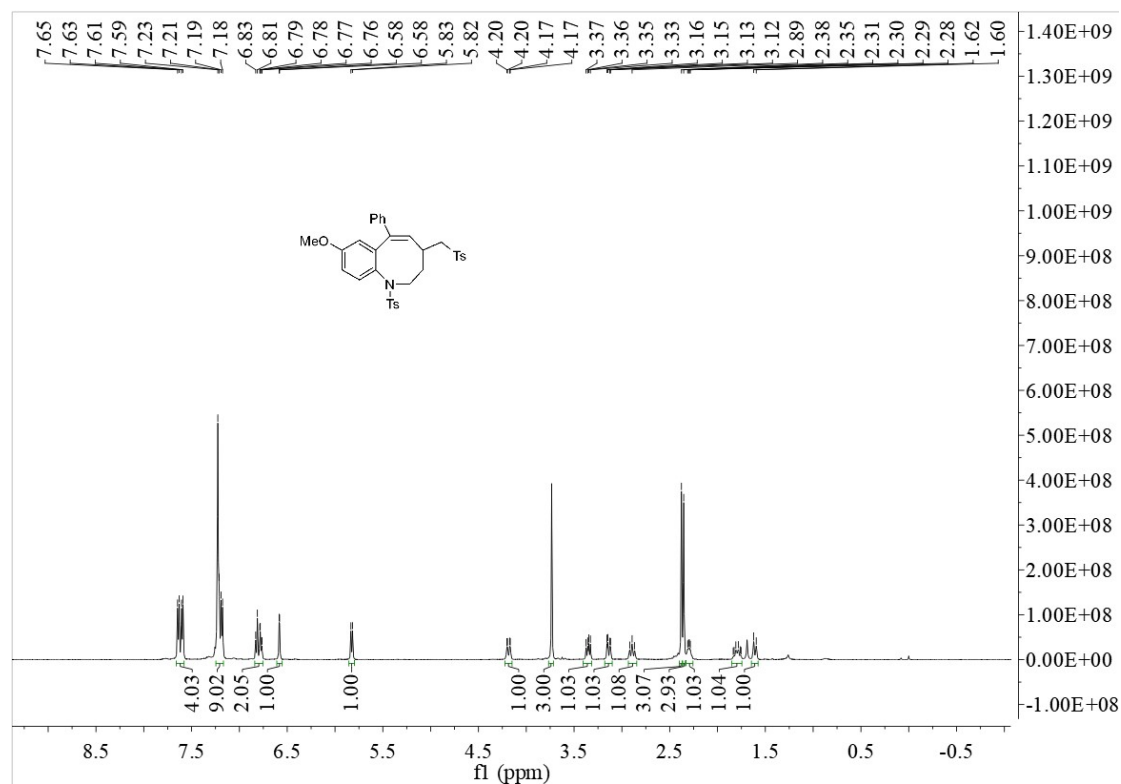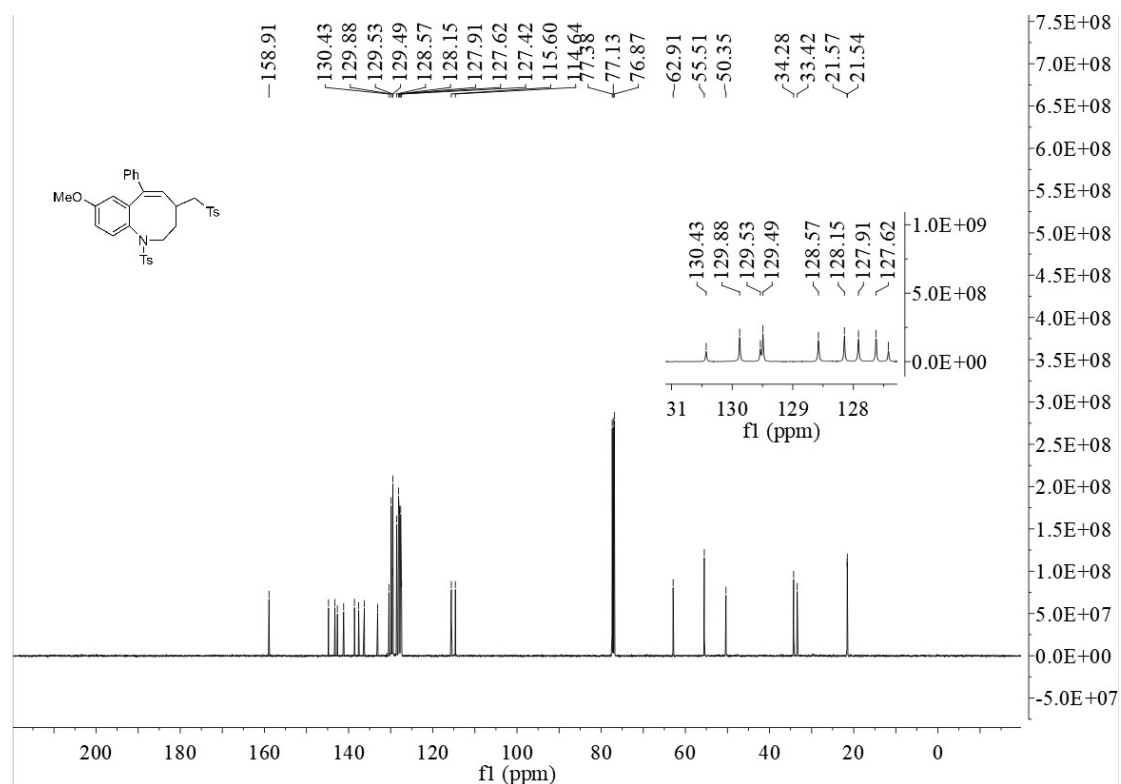

# Compound 3h

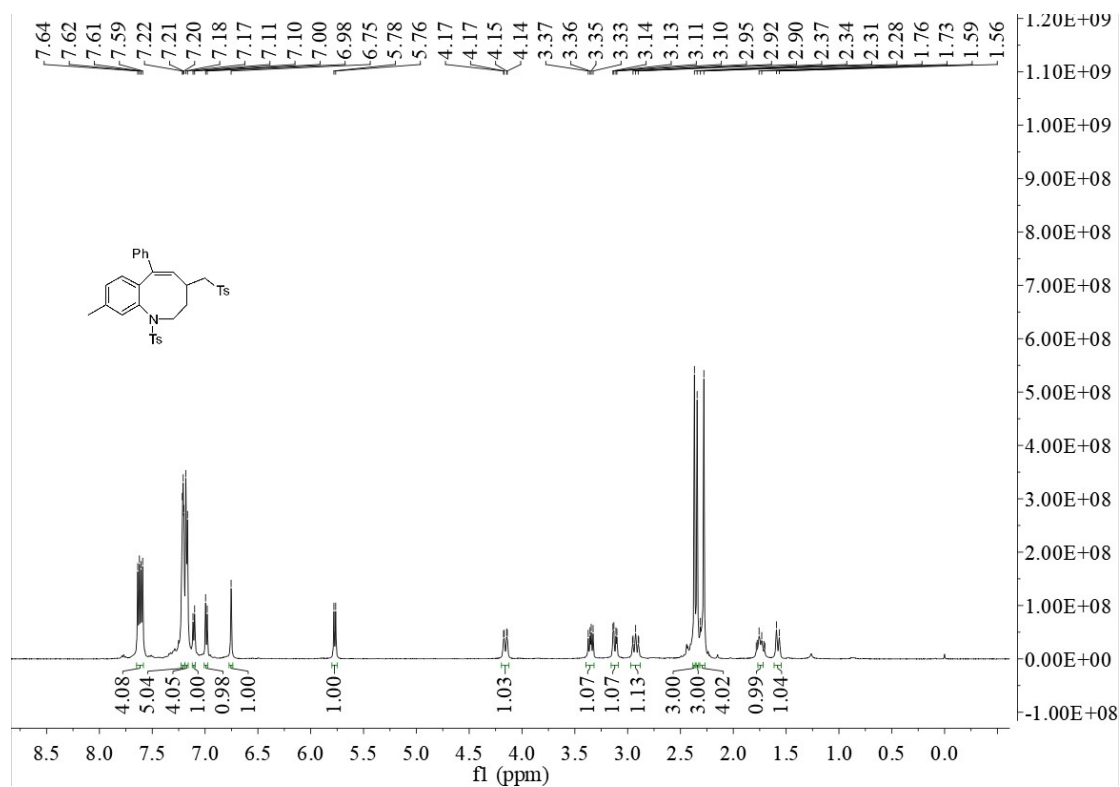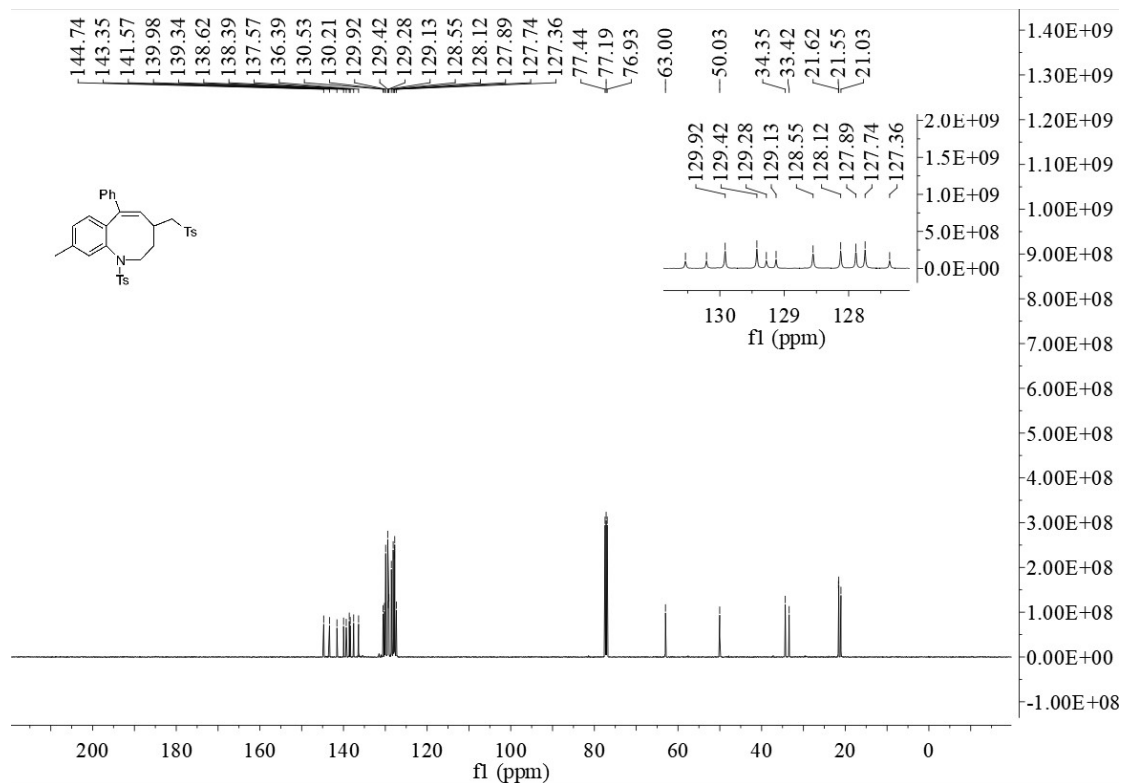

# Compound 3i

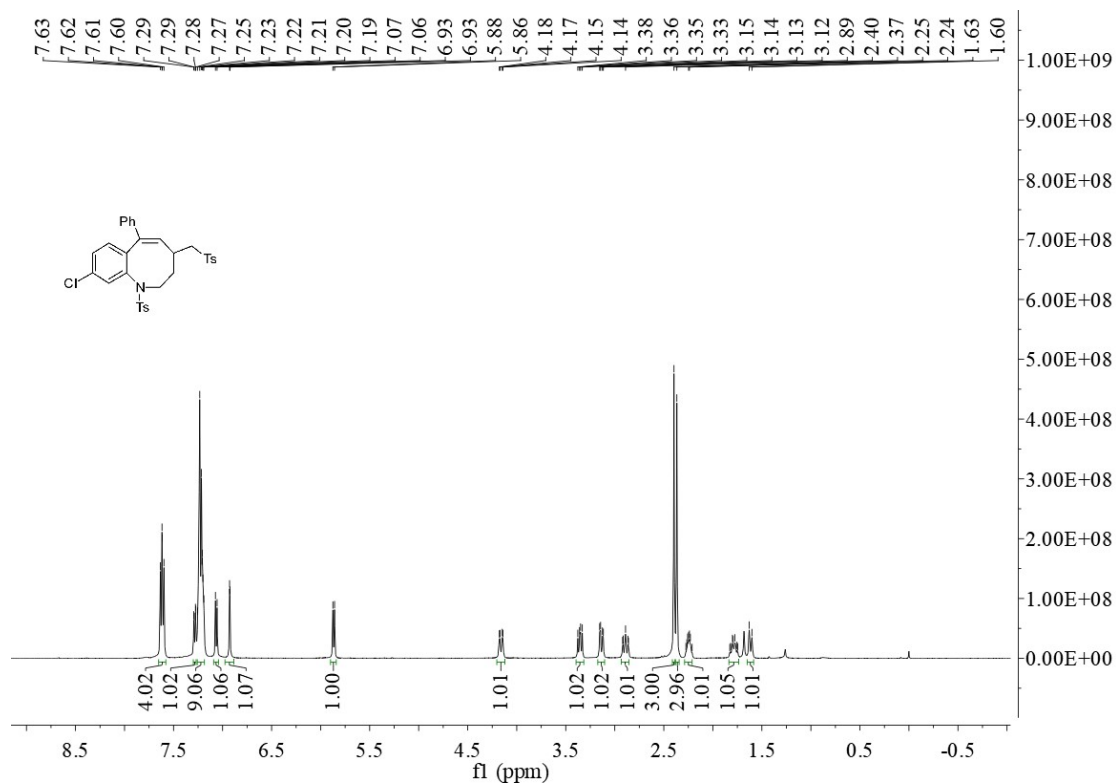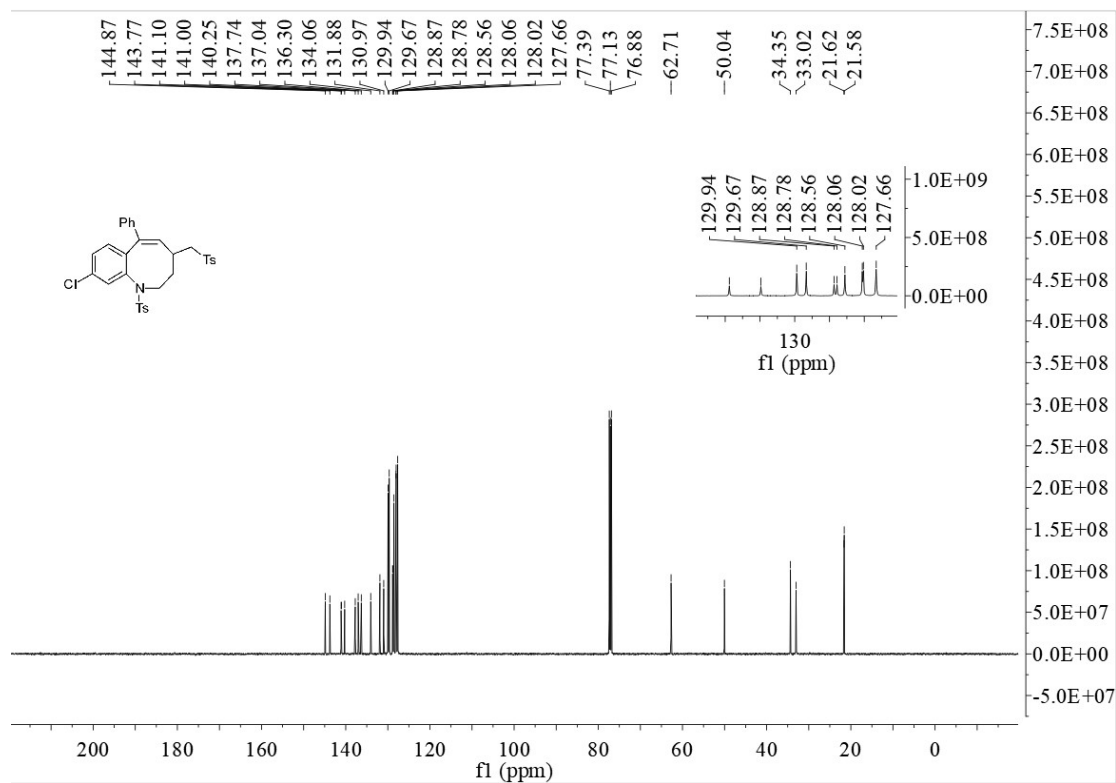

# Compound 3j

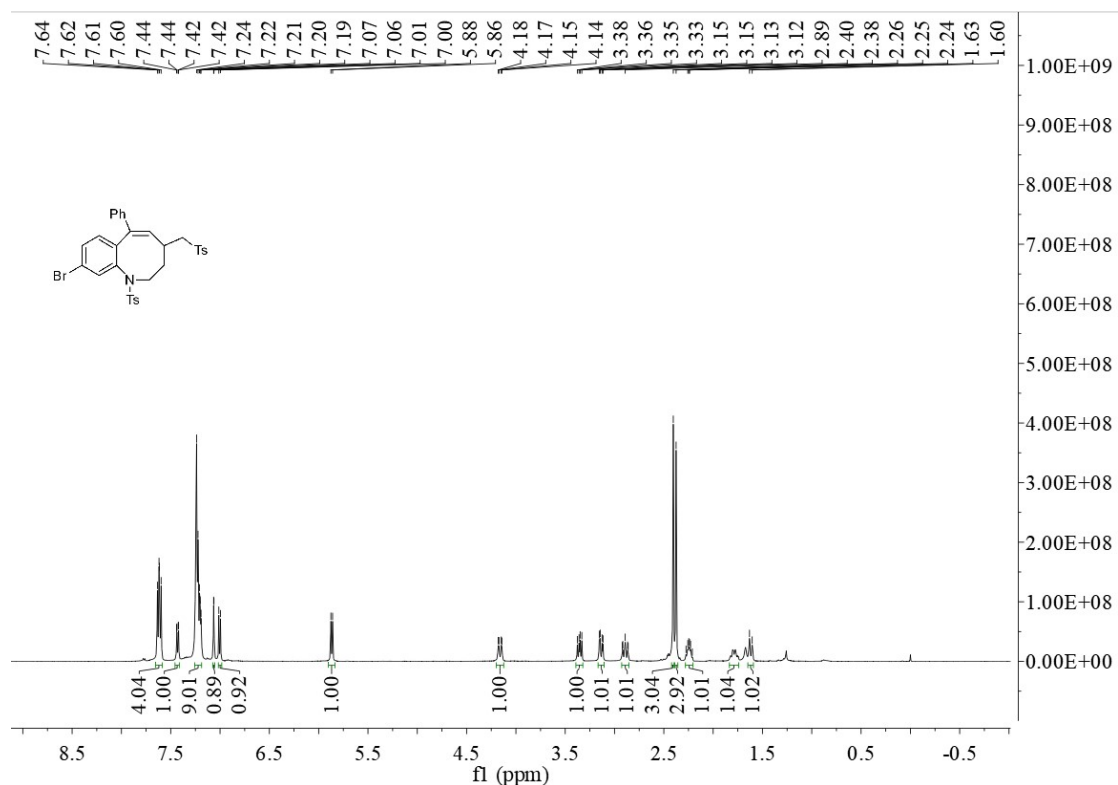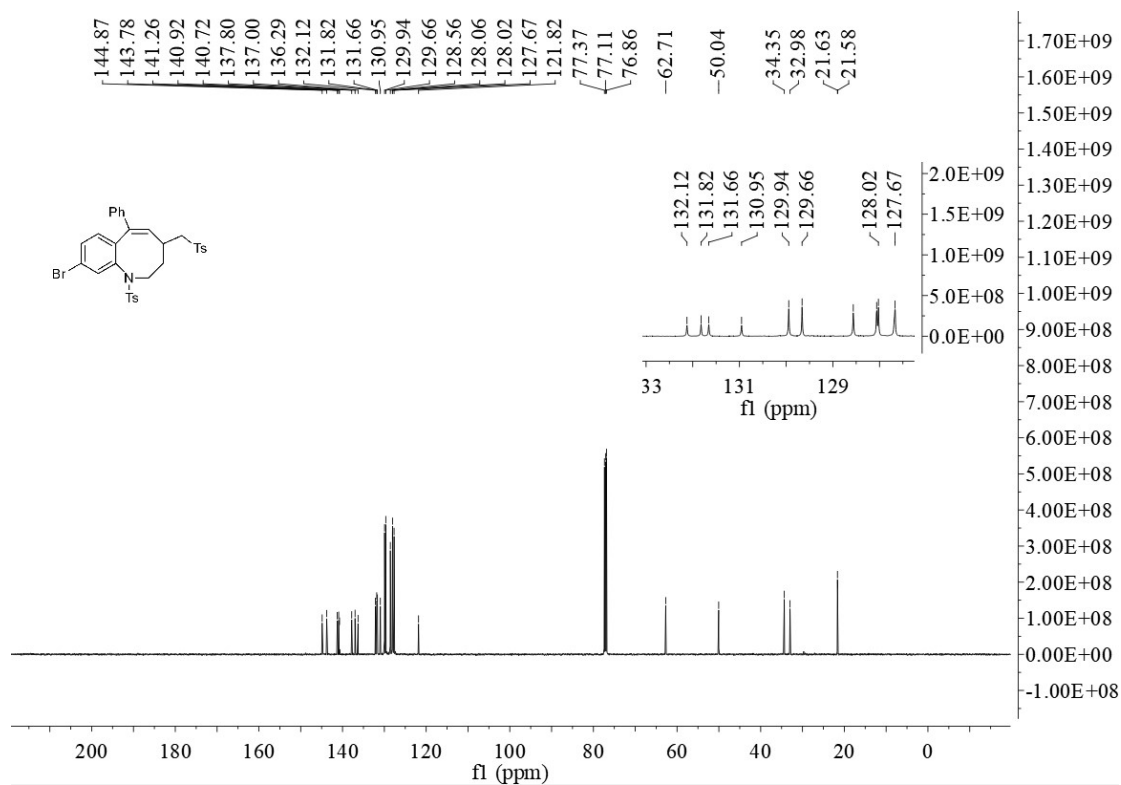

# Compound 3k

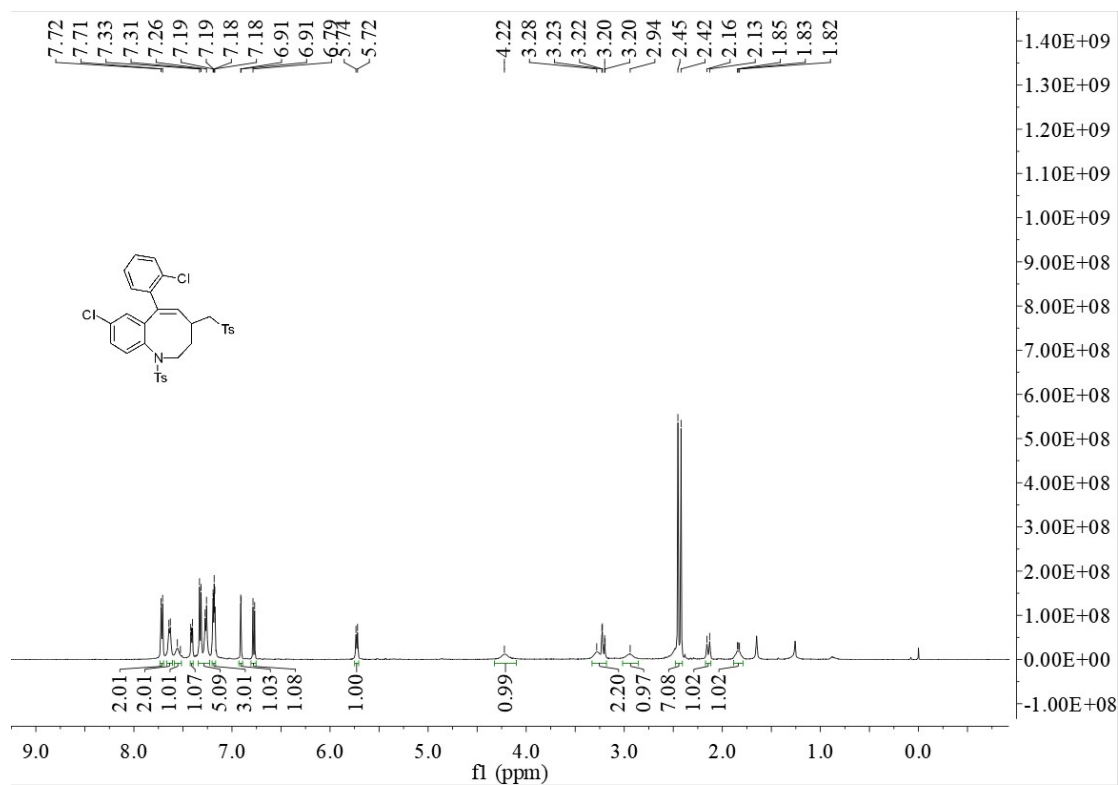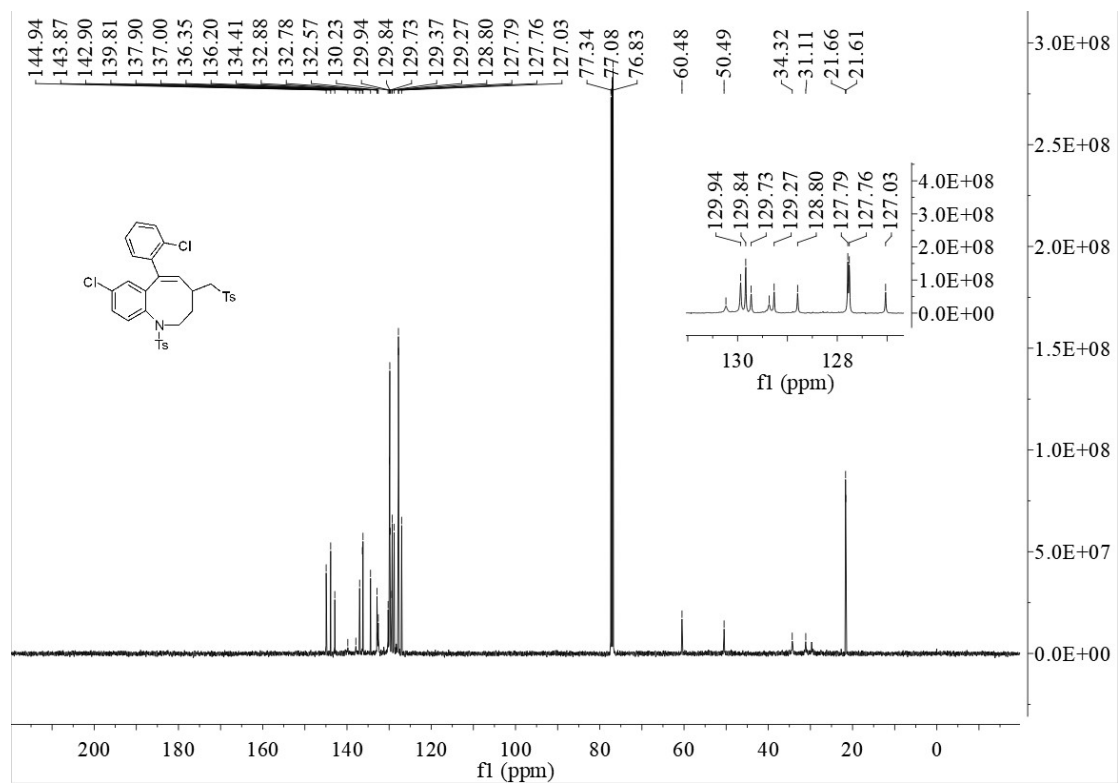

# Compound 3l

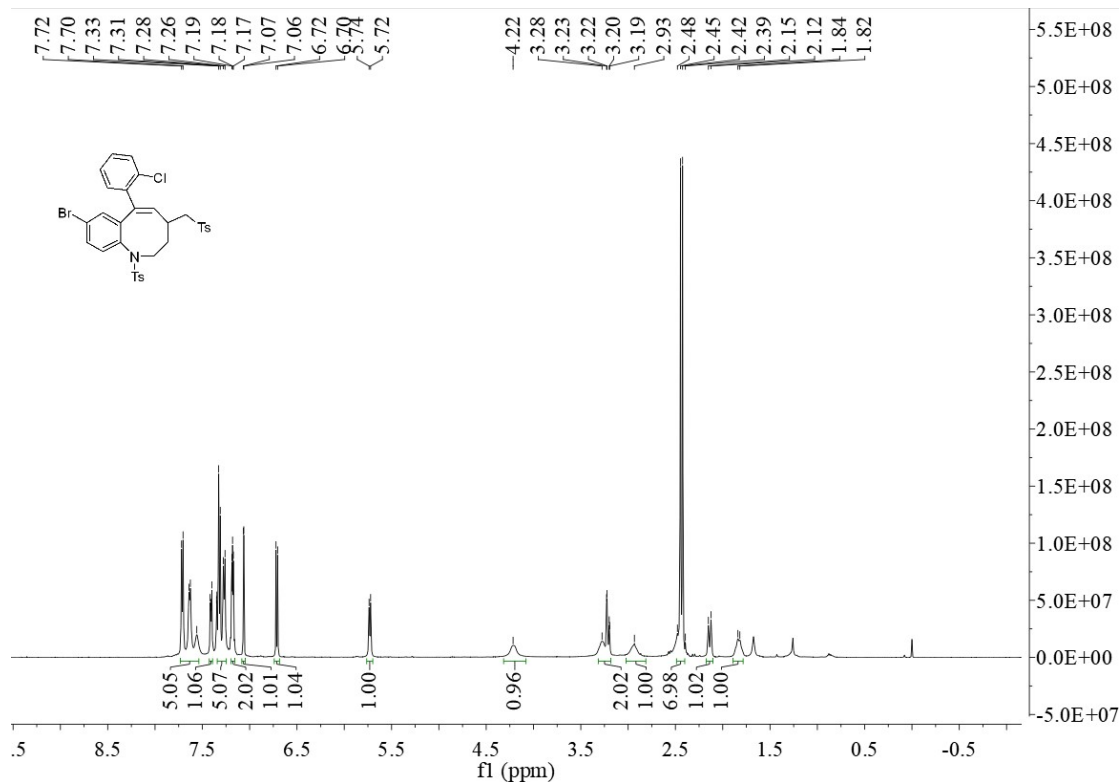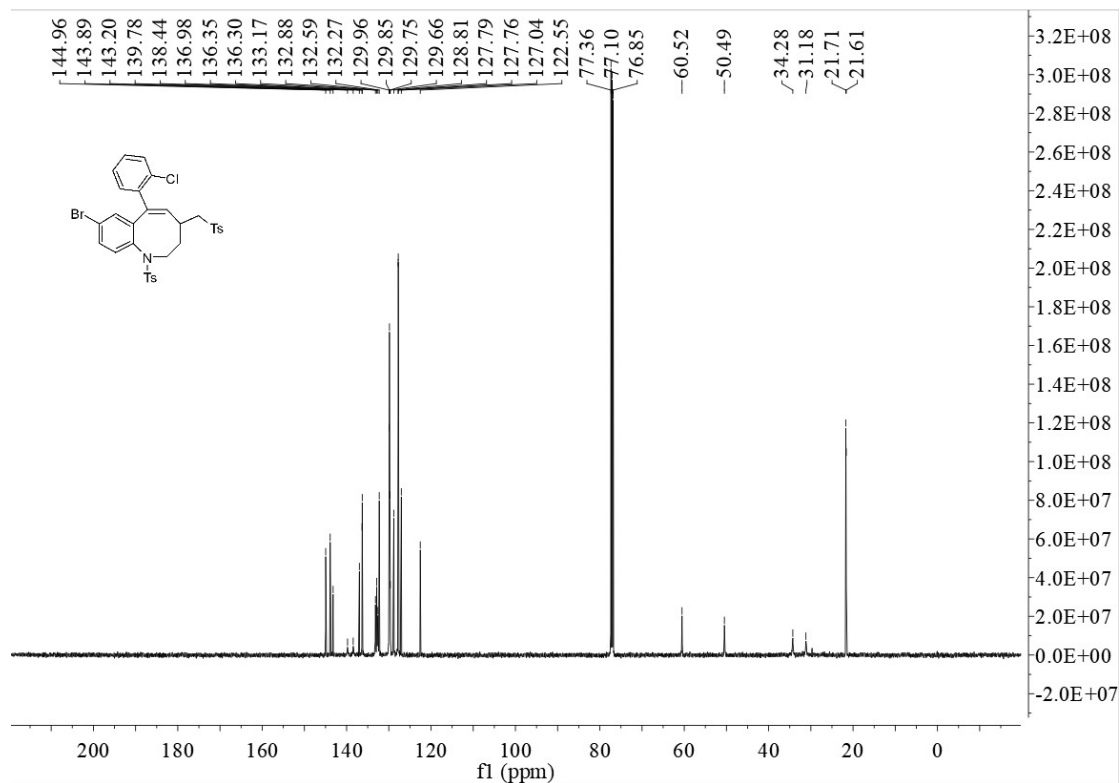



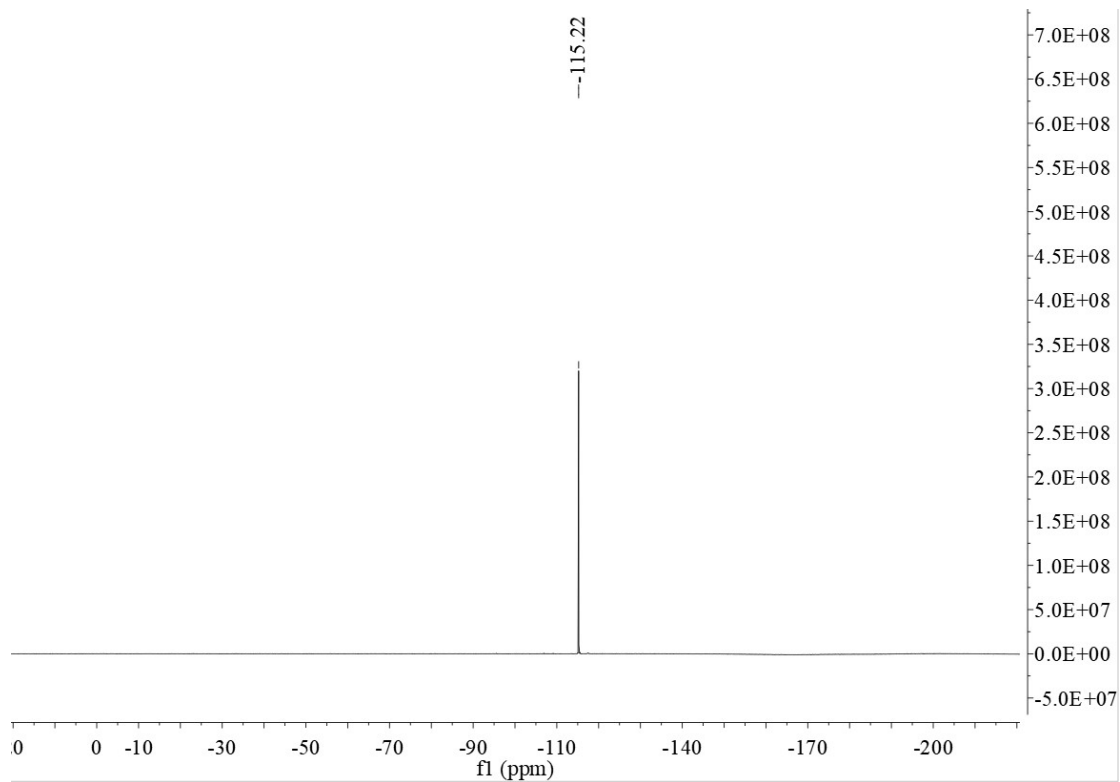

### Compound 3n

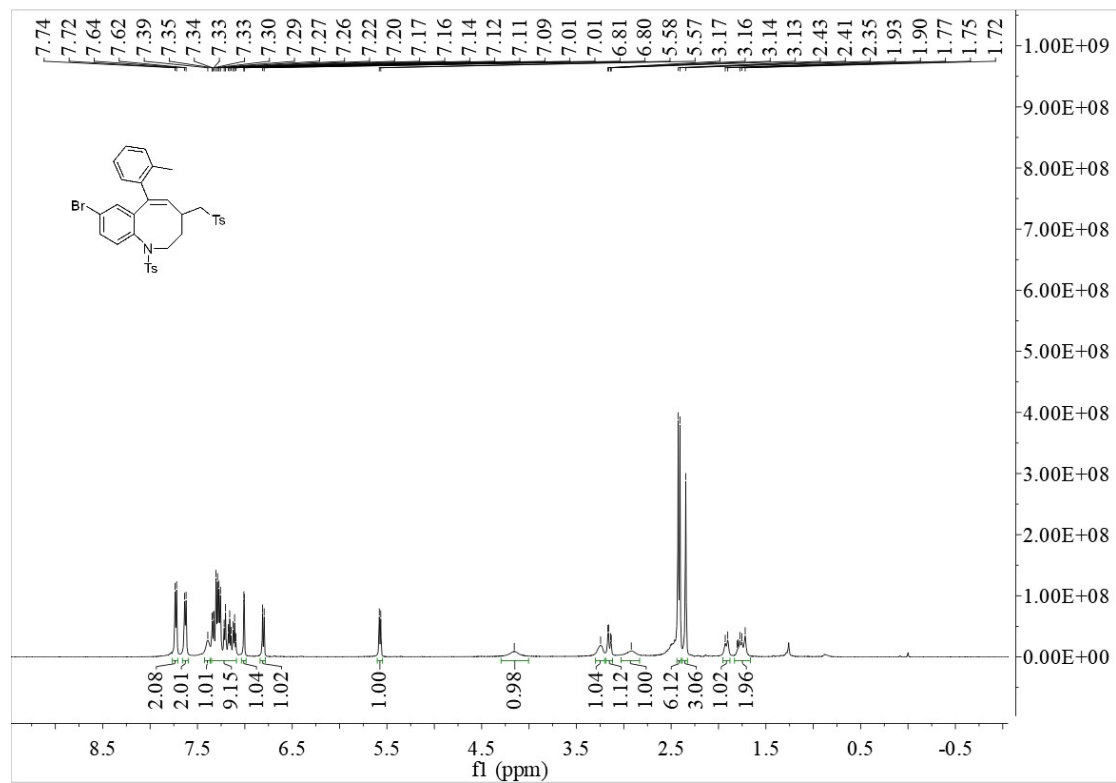



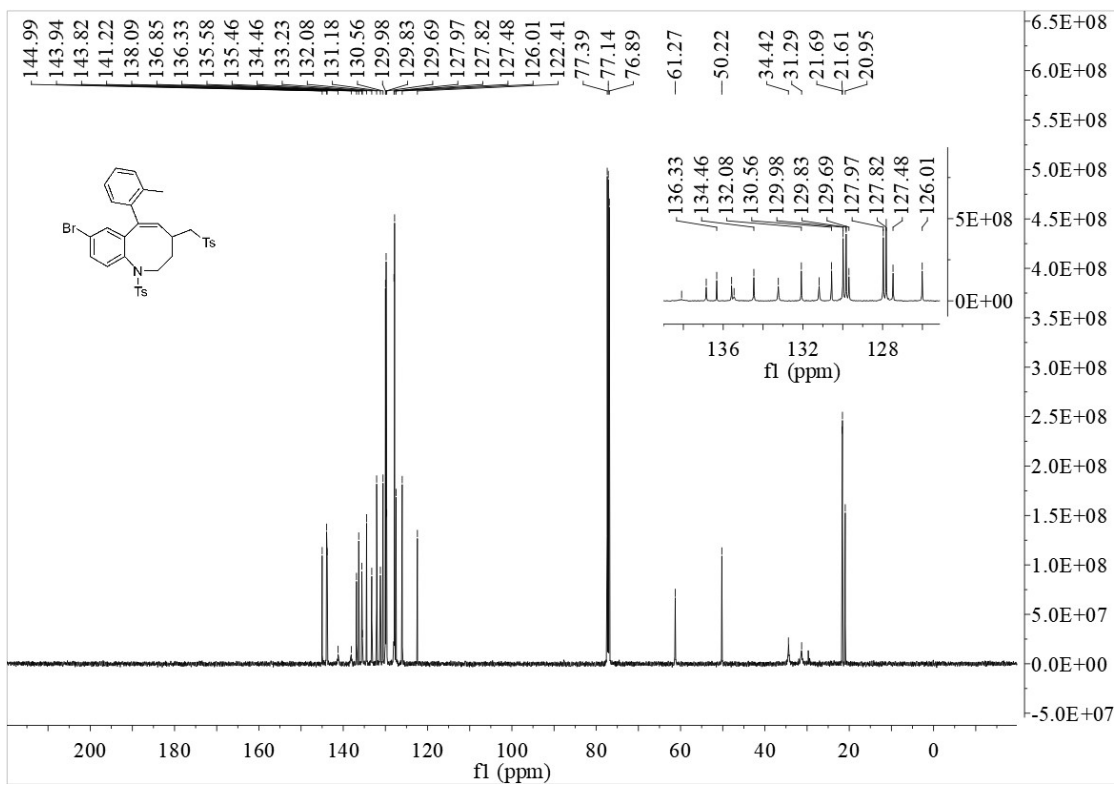

### Compound 30

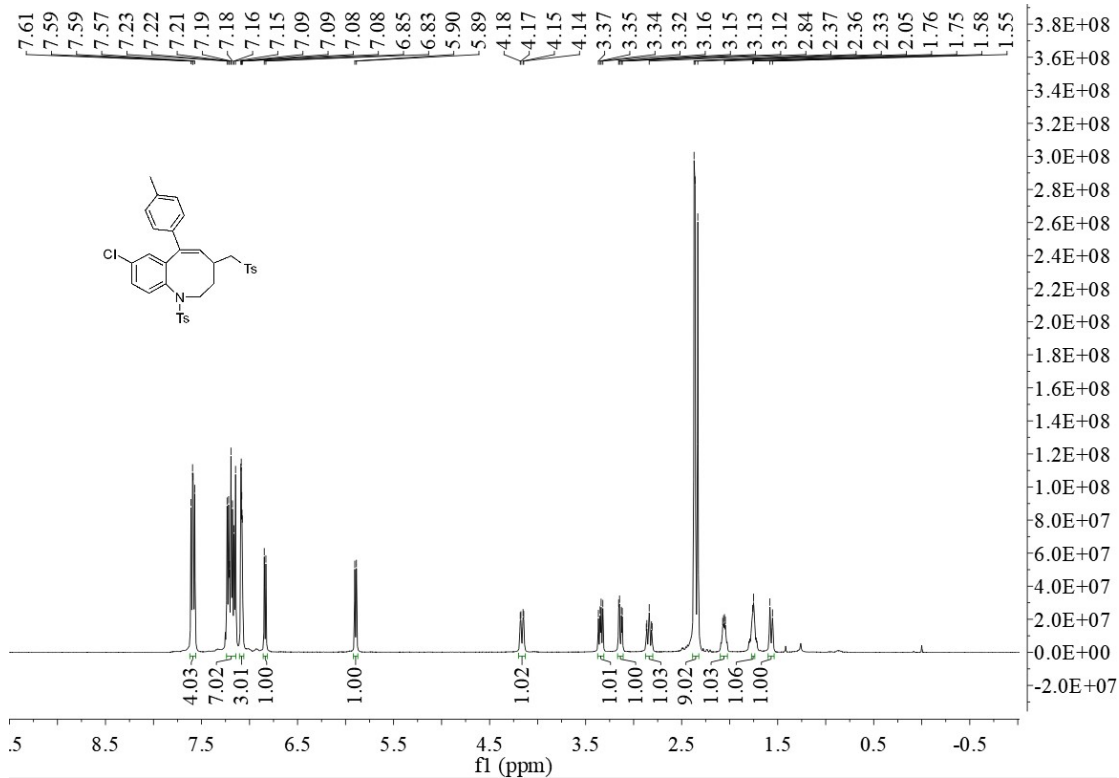

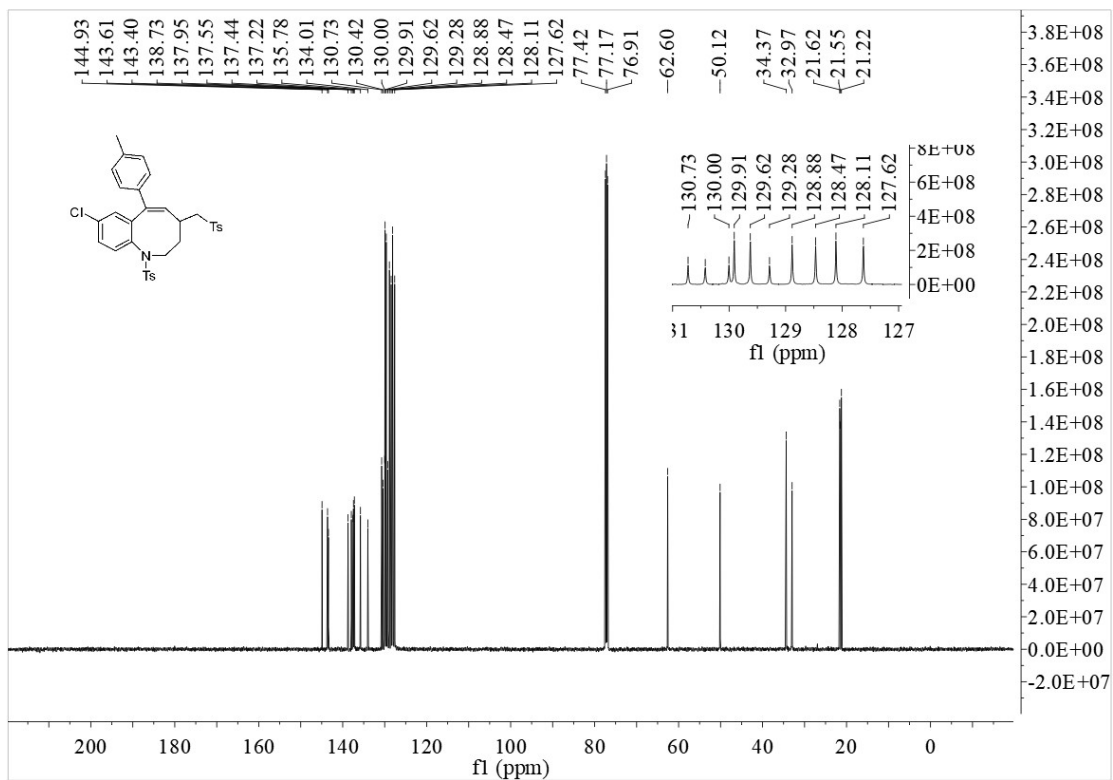

### Compound 3p

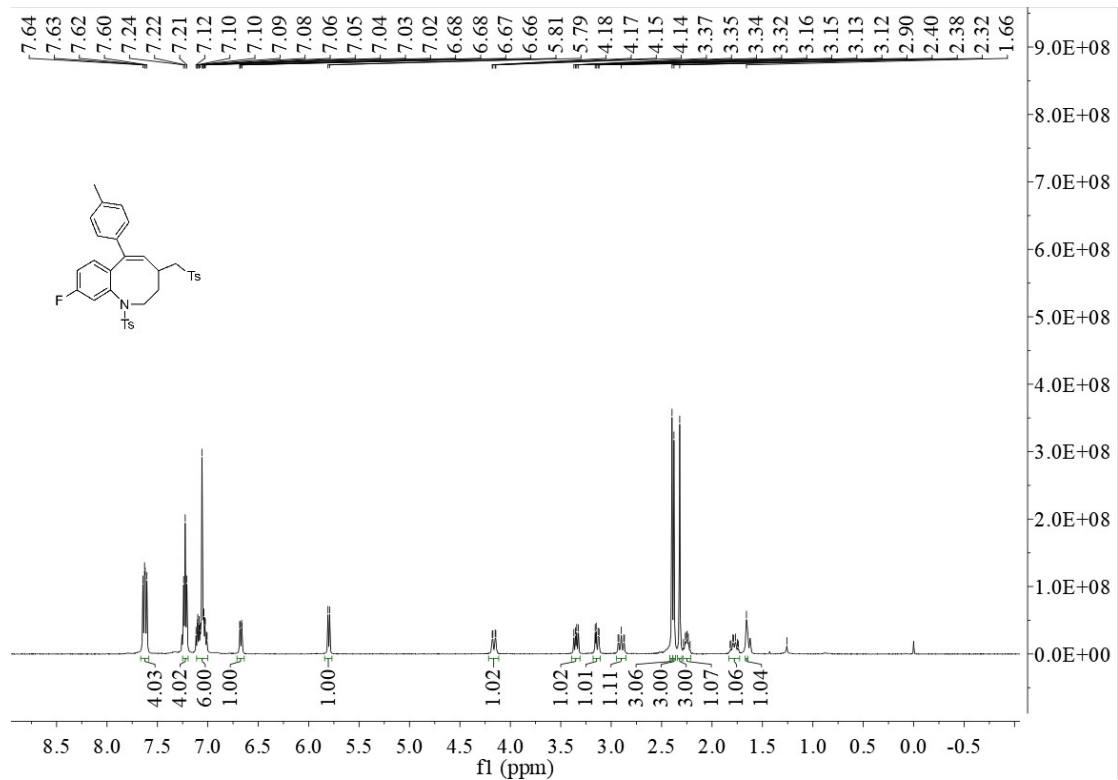

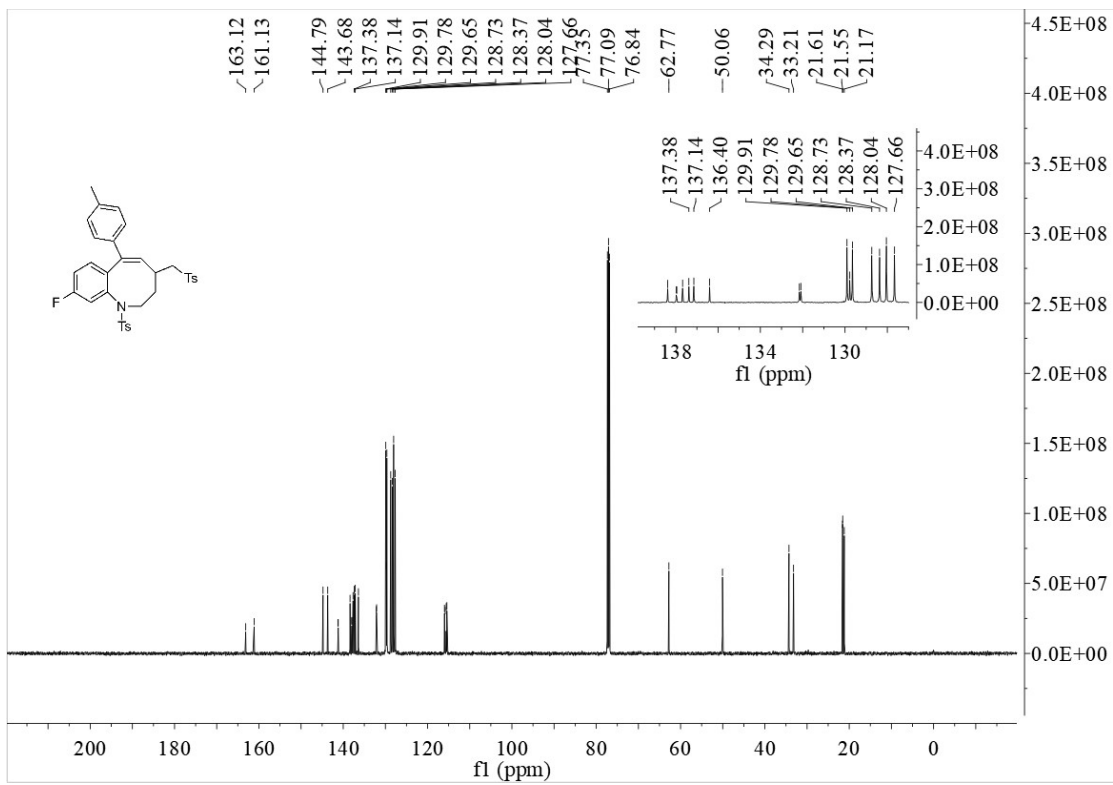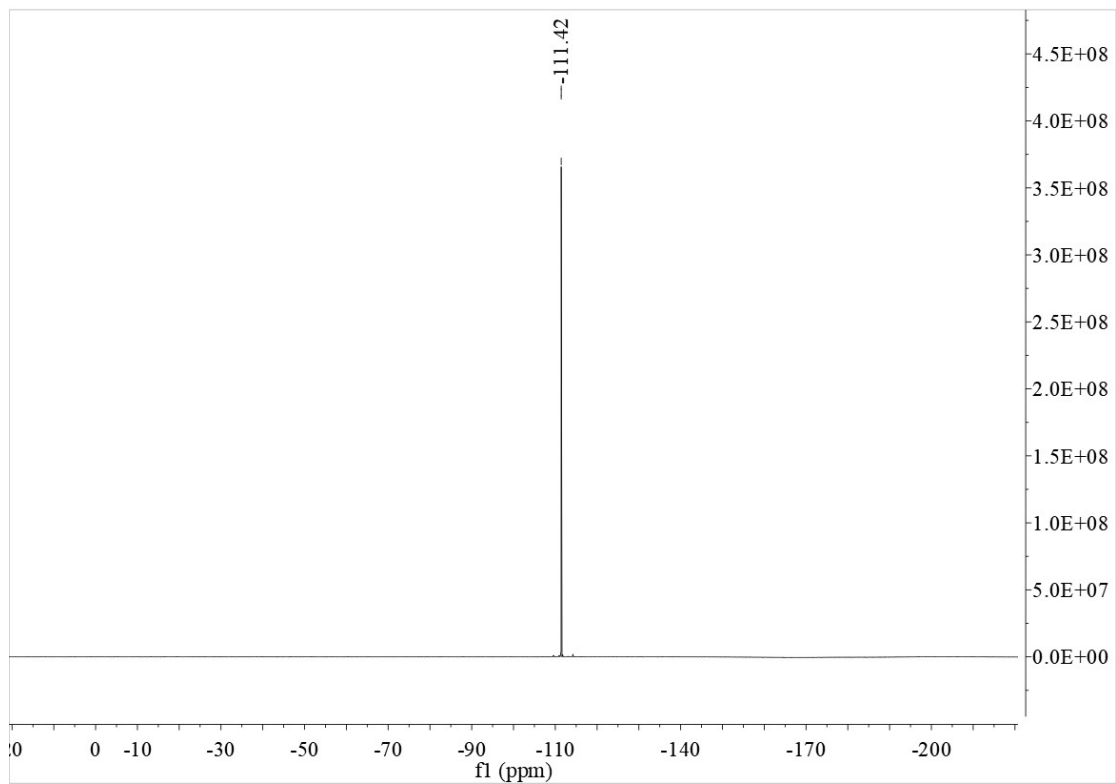

# Compound 3q

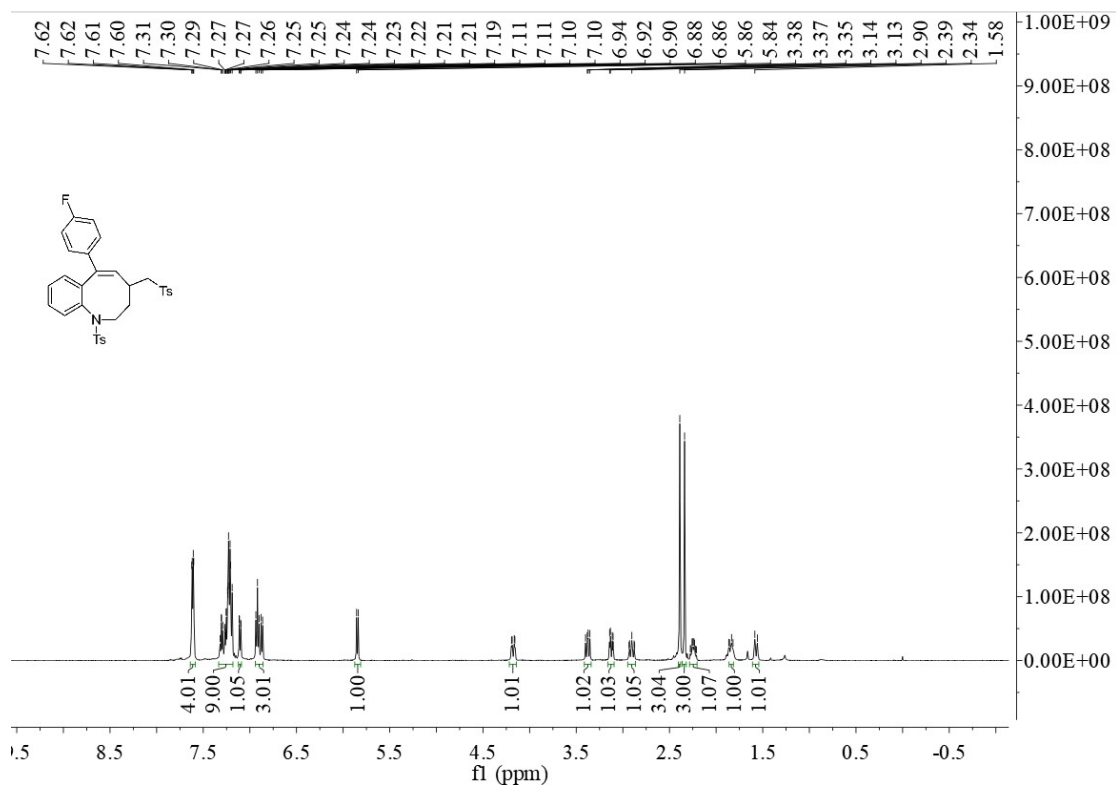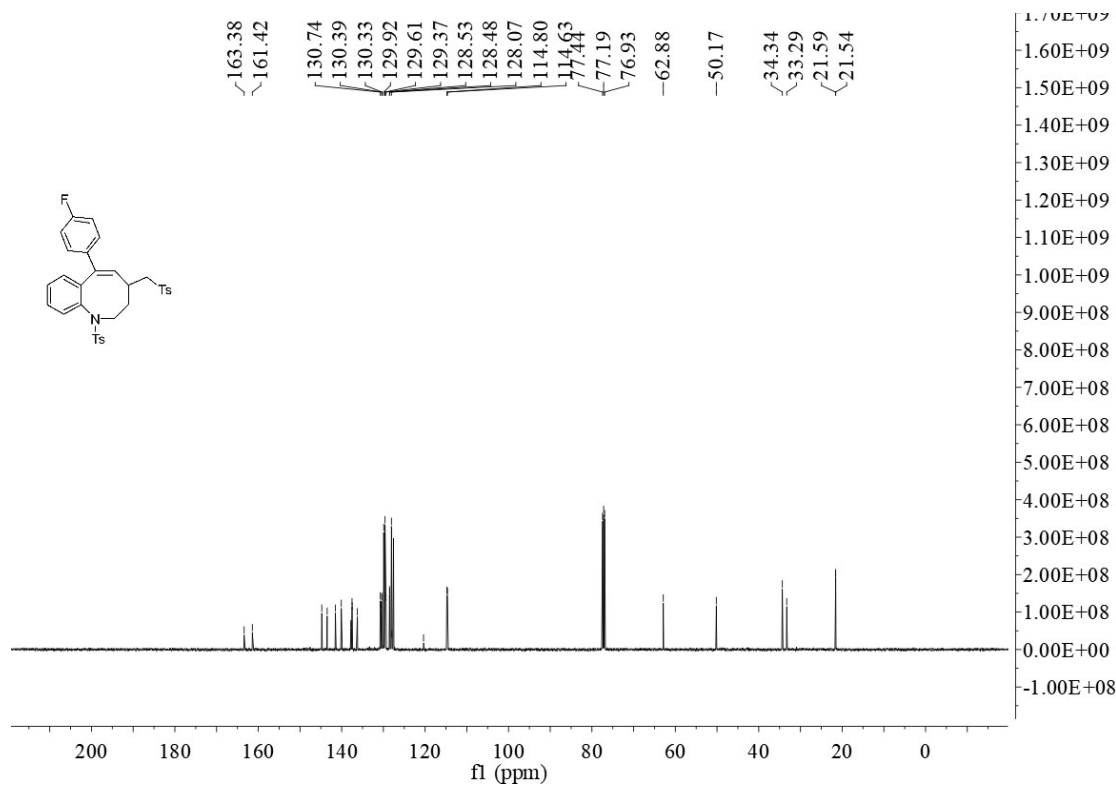

### Compound 3r

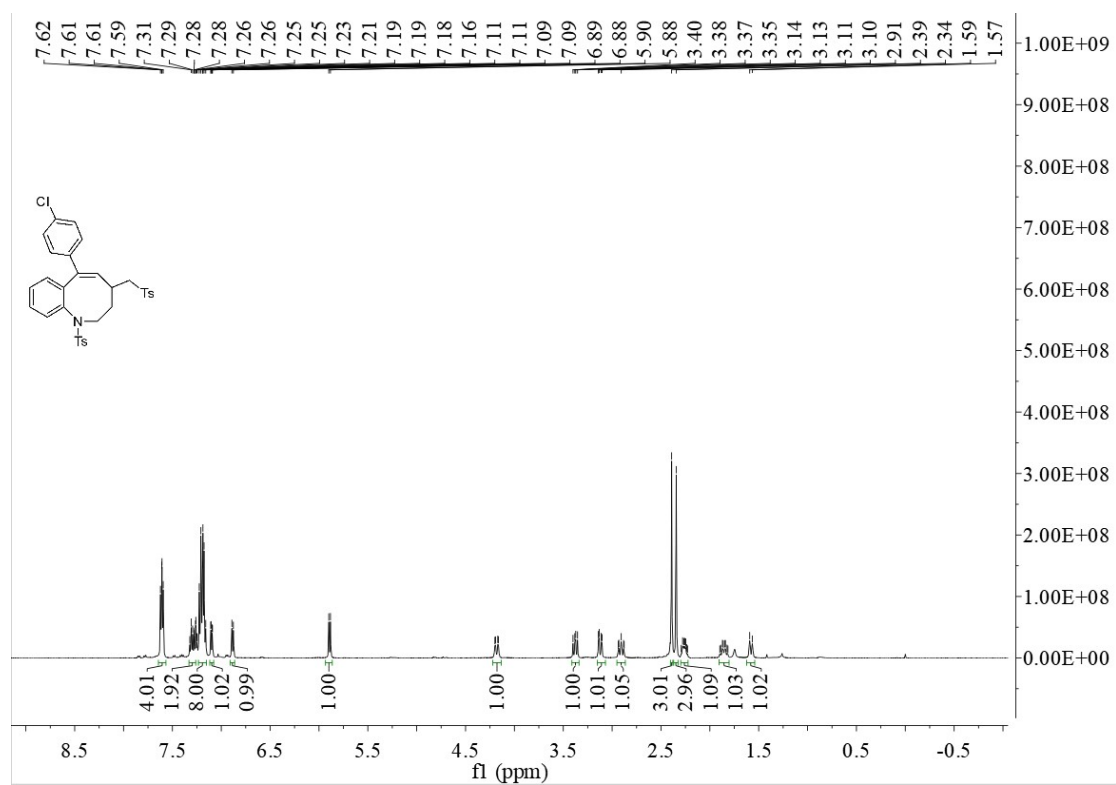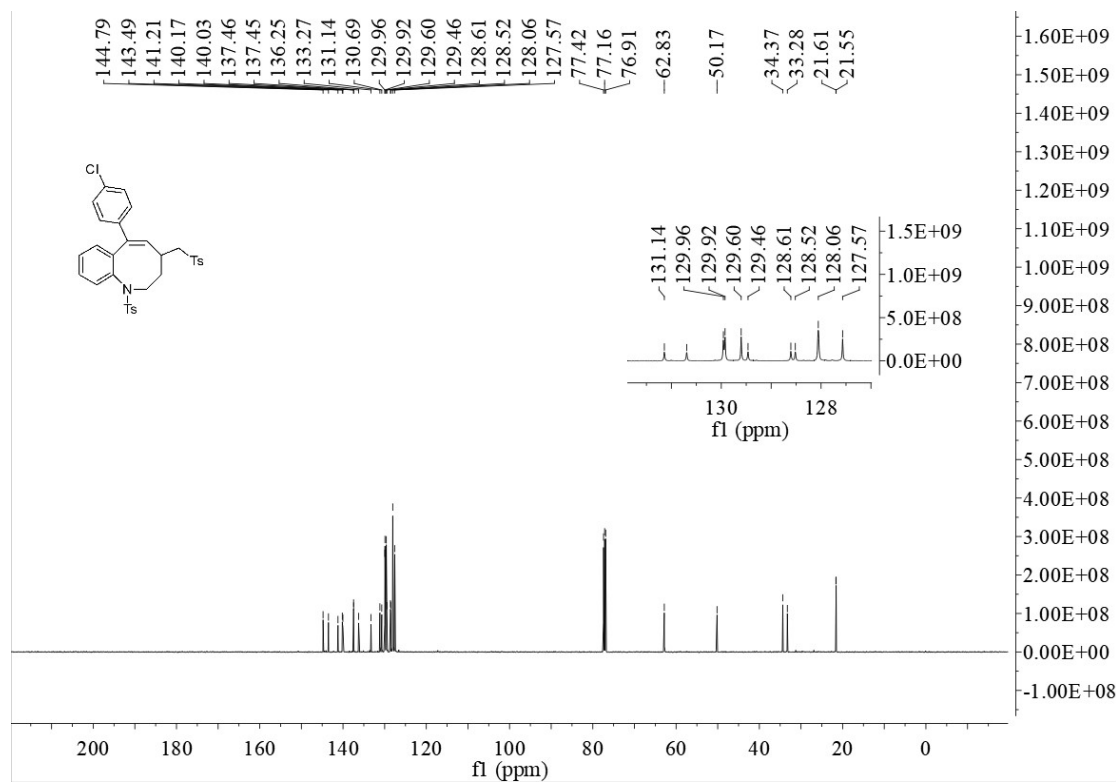

### Compound 3s

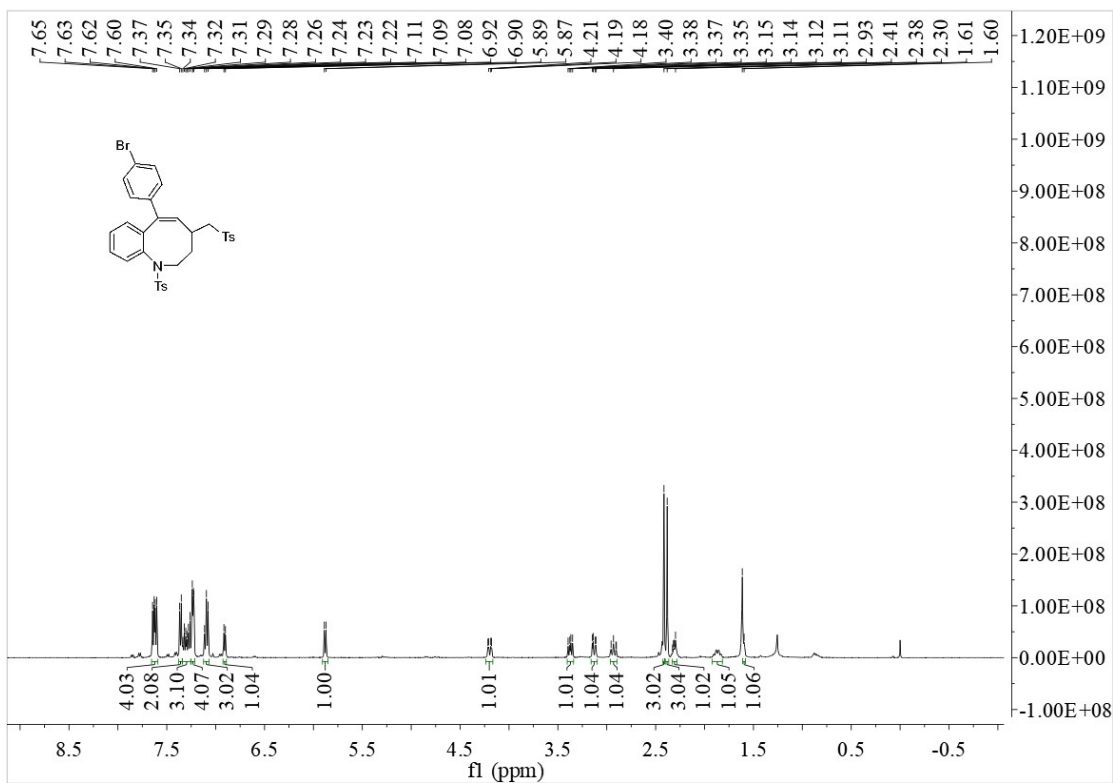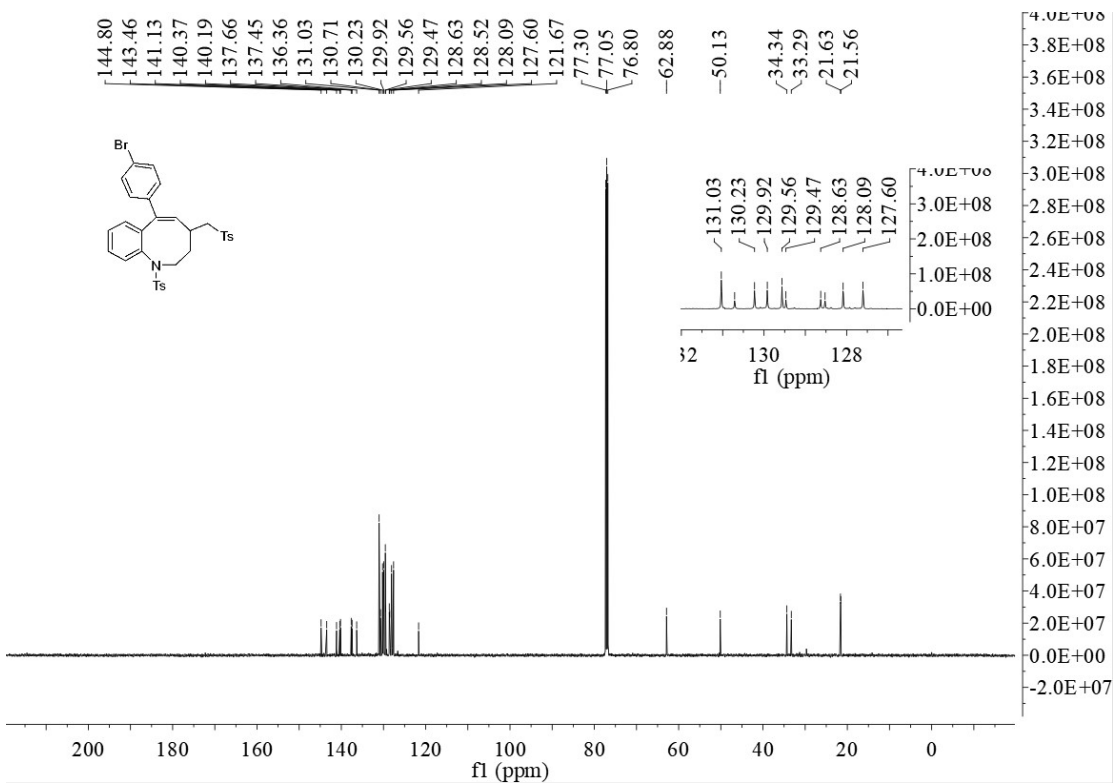

**Compound 3t**

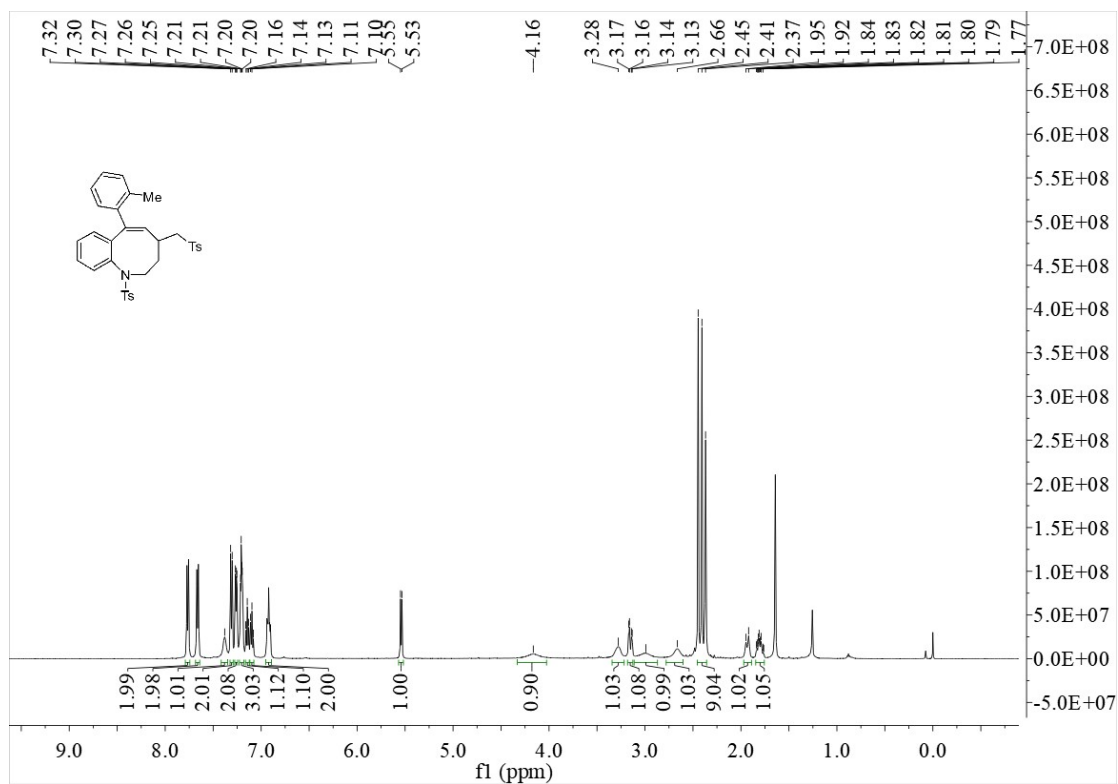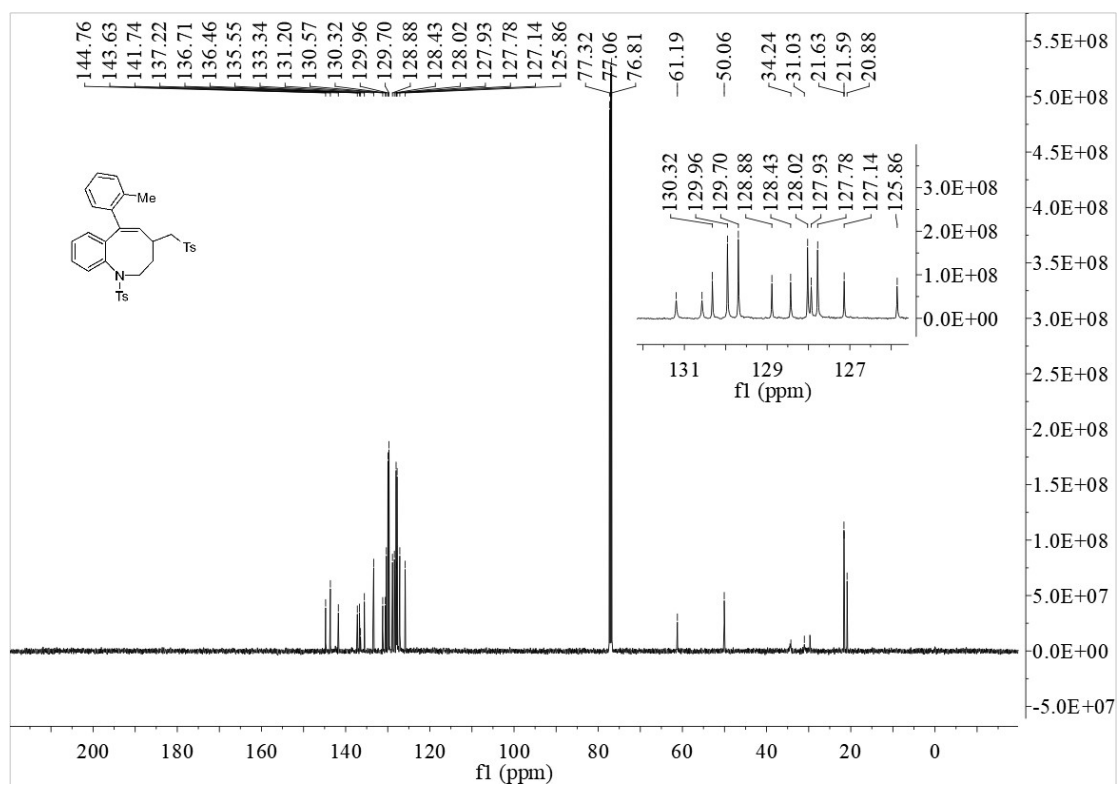

**Compound 3u**

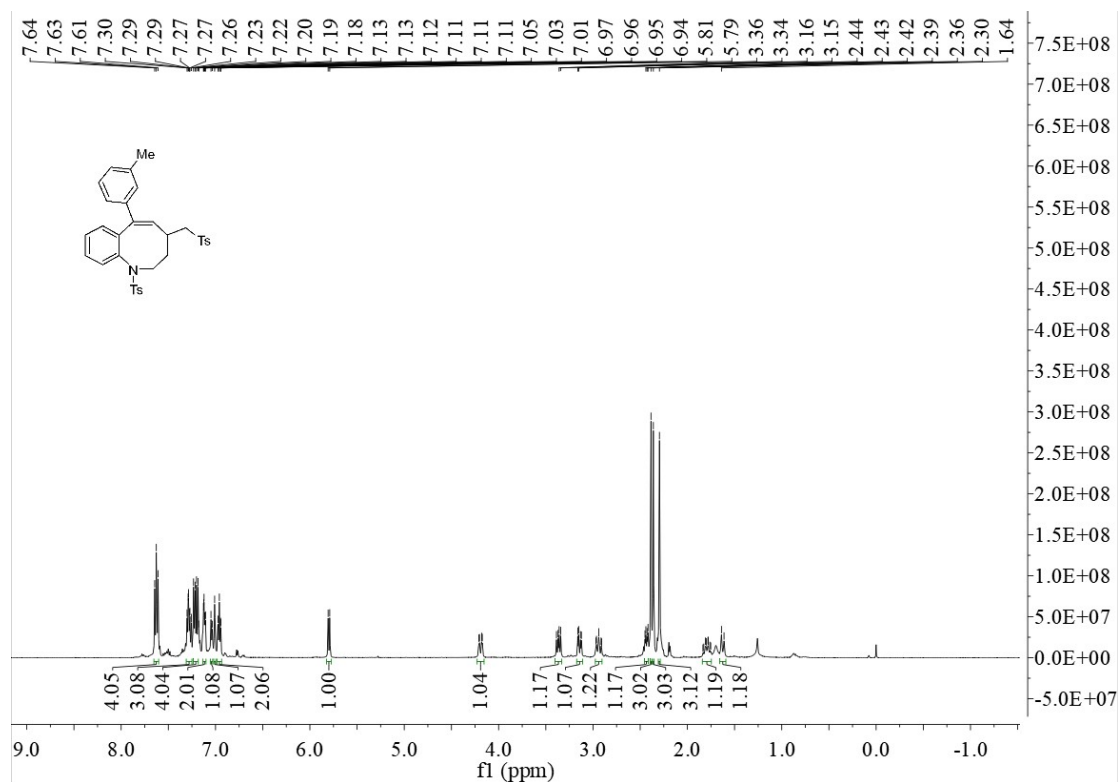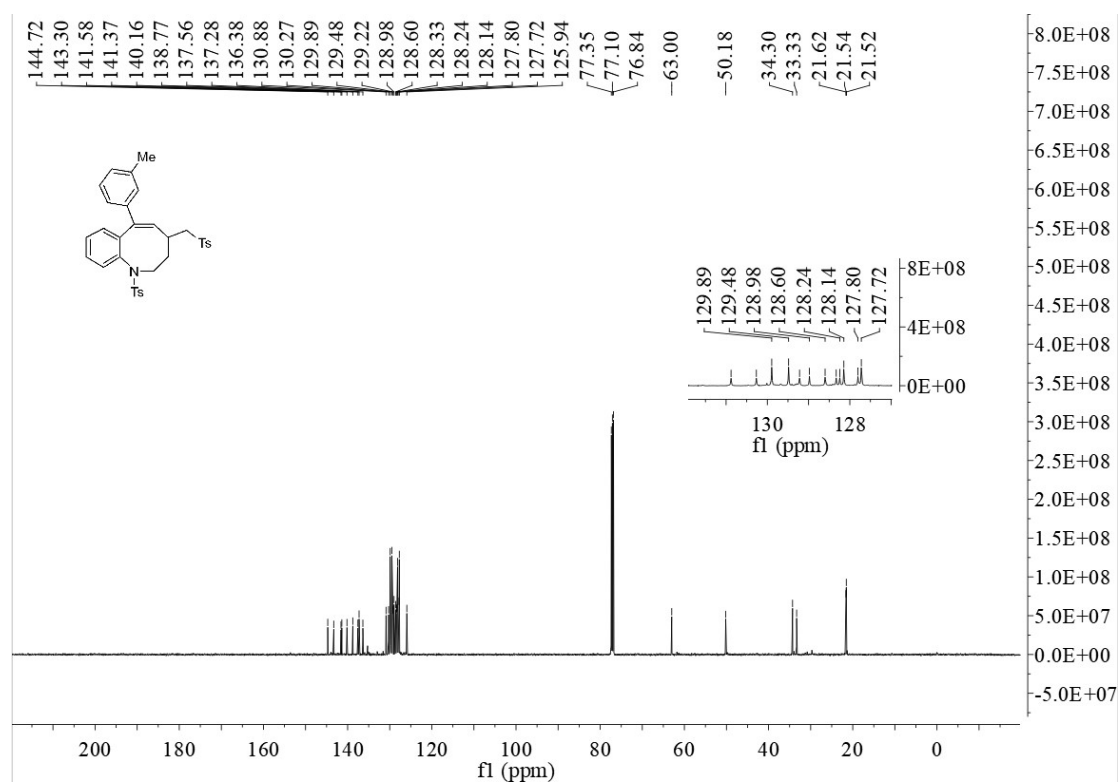

**Compound 3v**



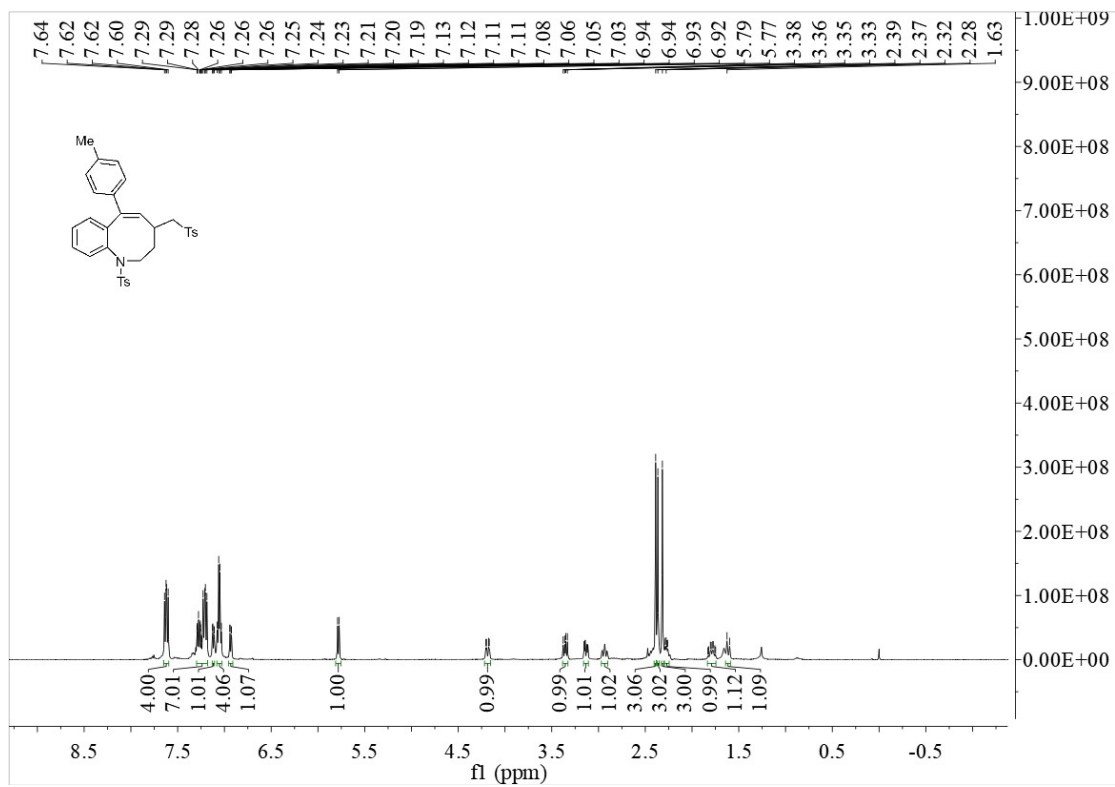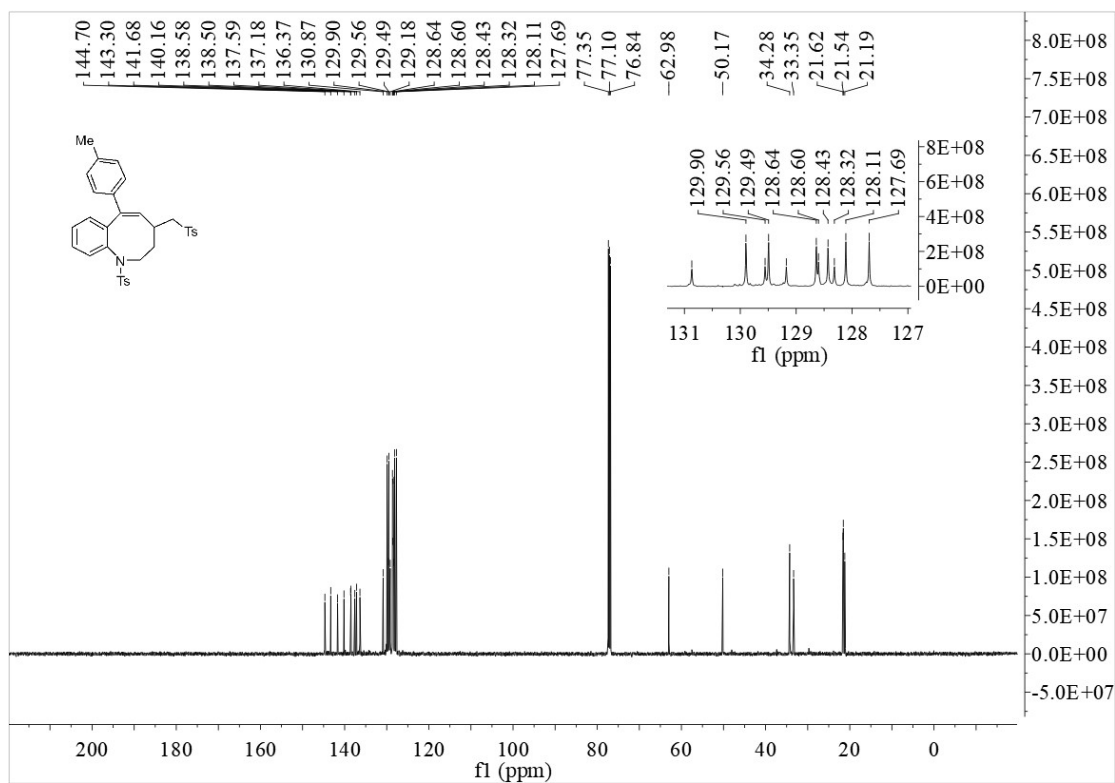

**Compound 3aa**

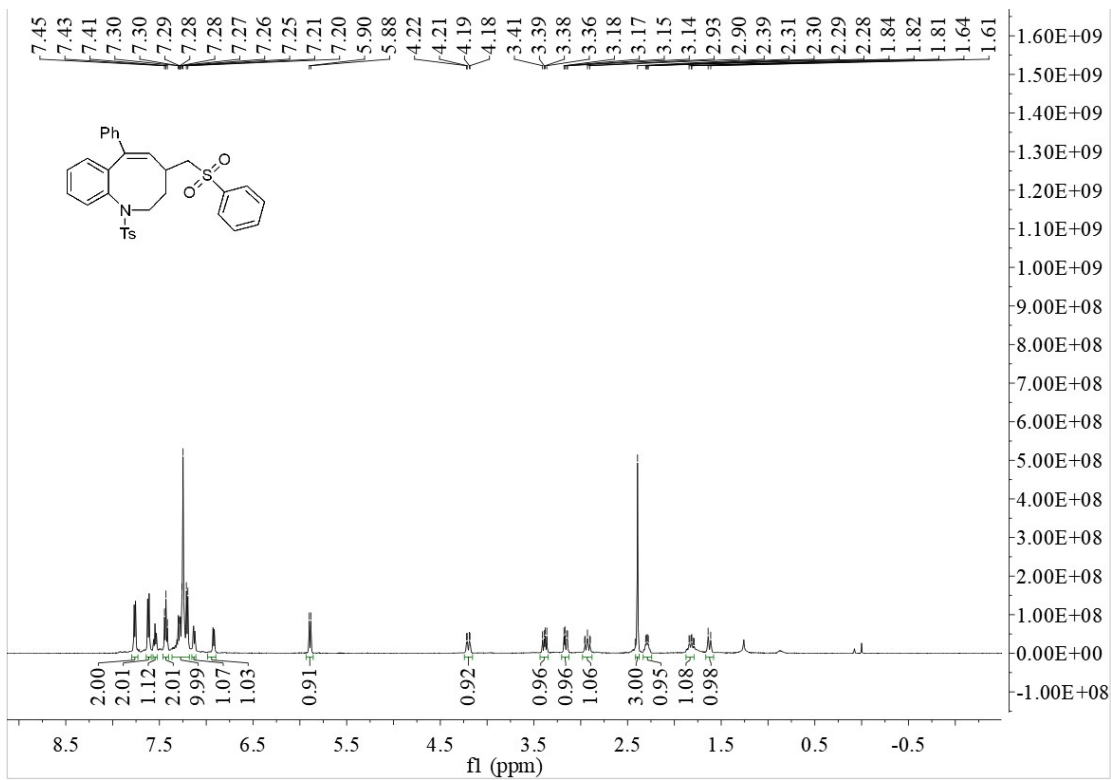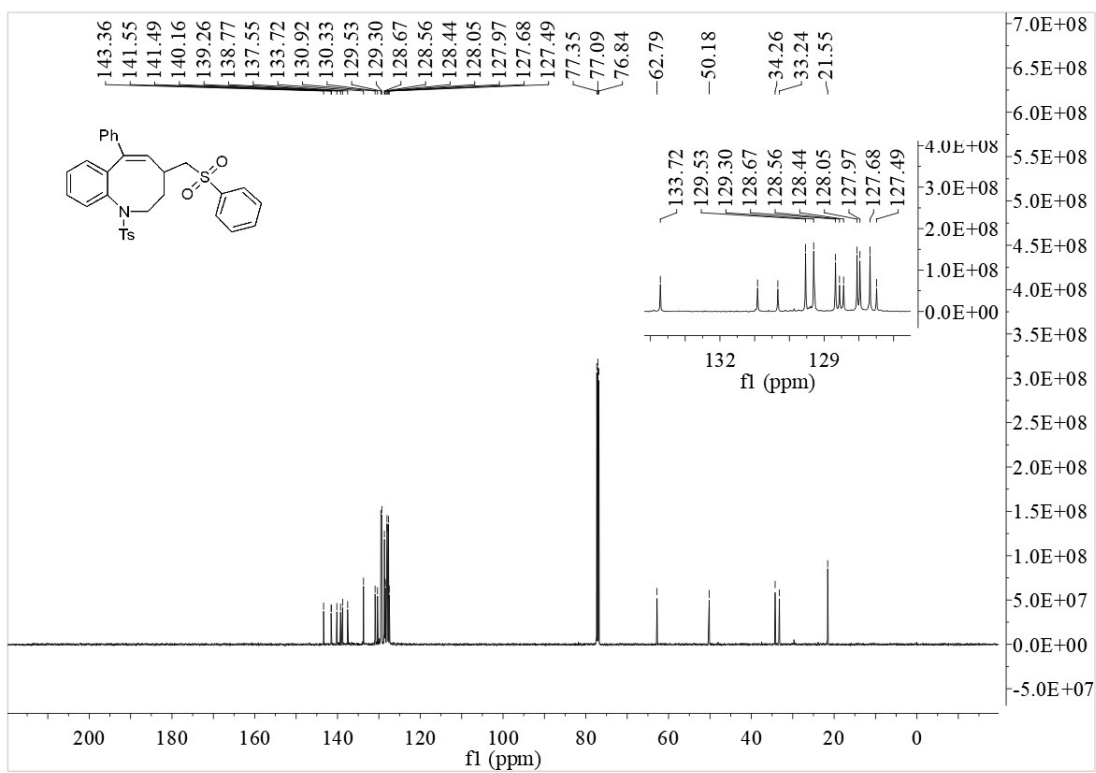

**Compound 3ab**

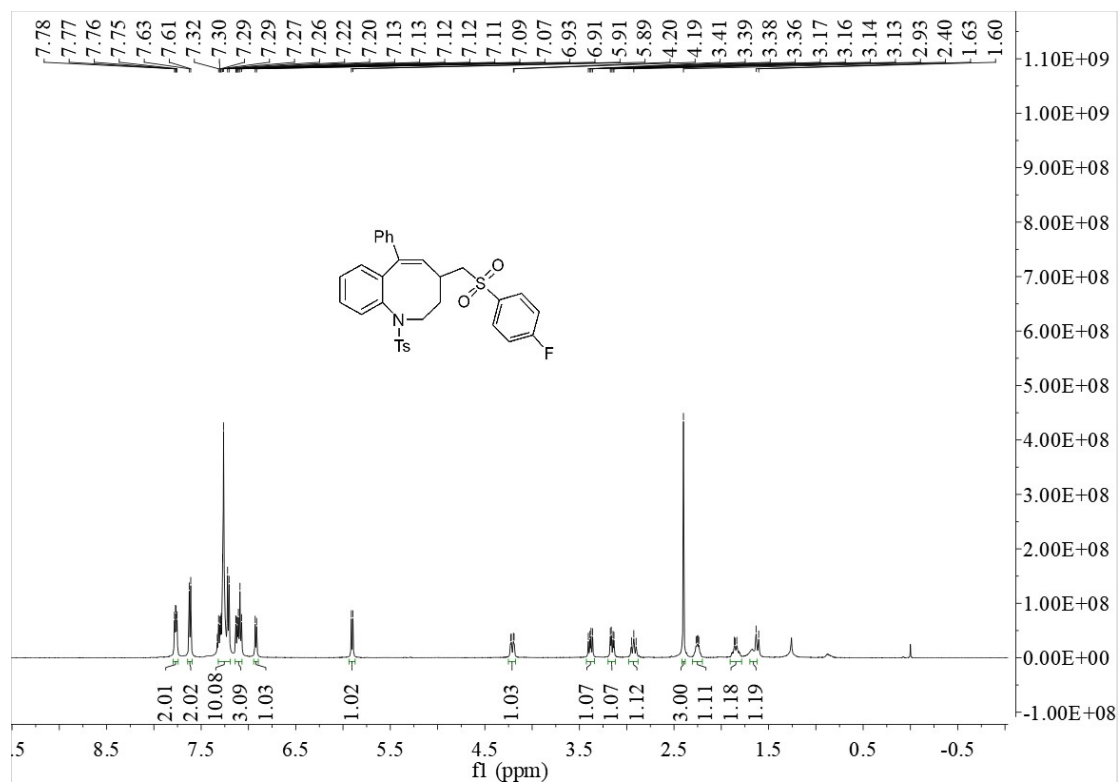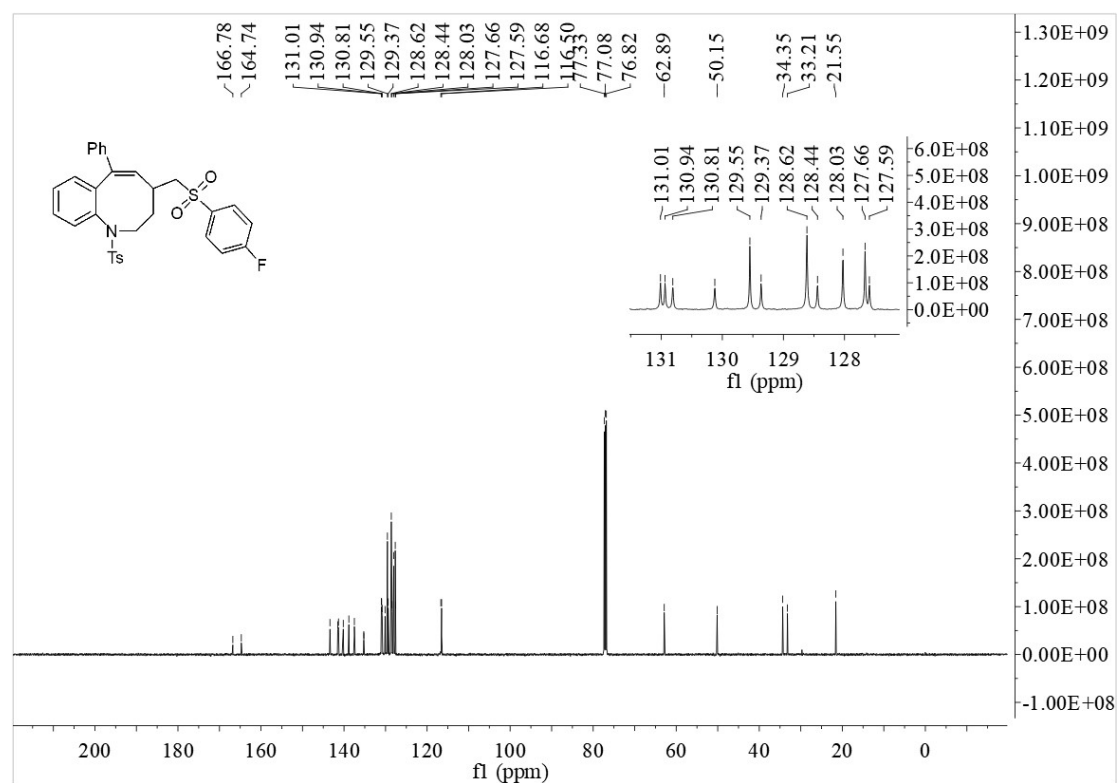

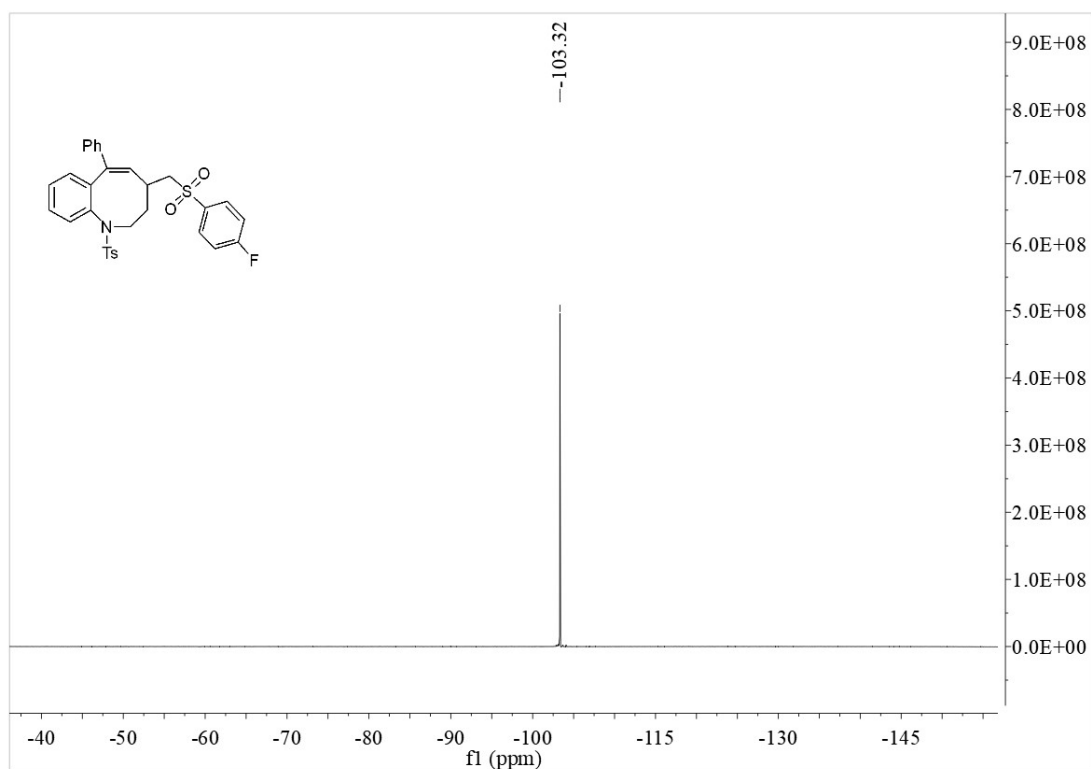

### Compound 3ac

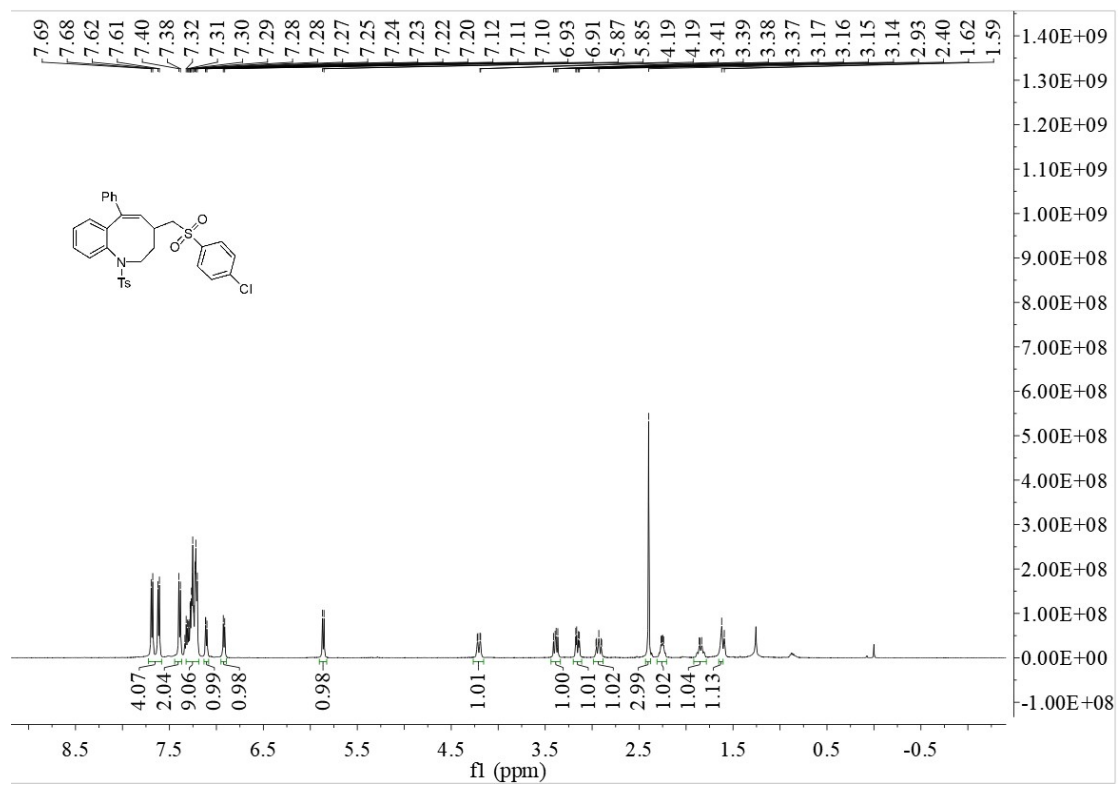

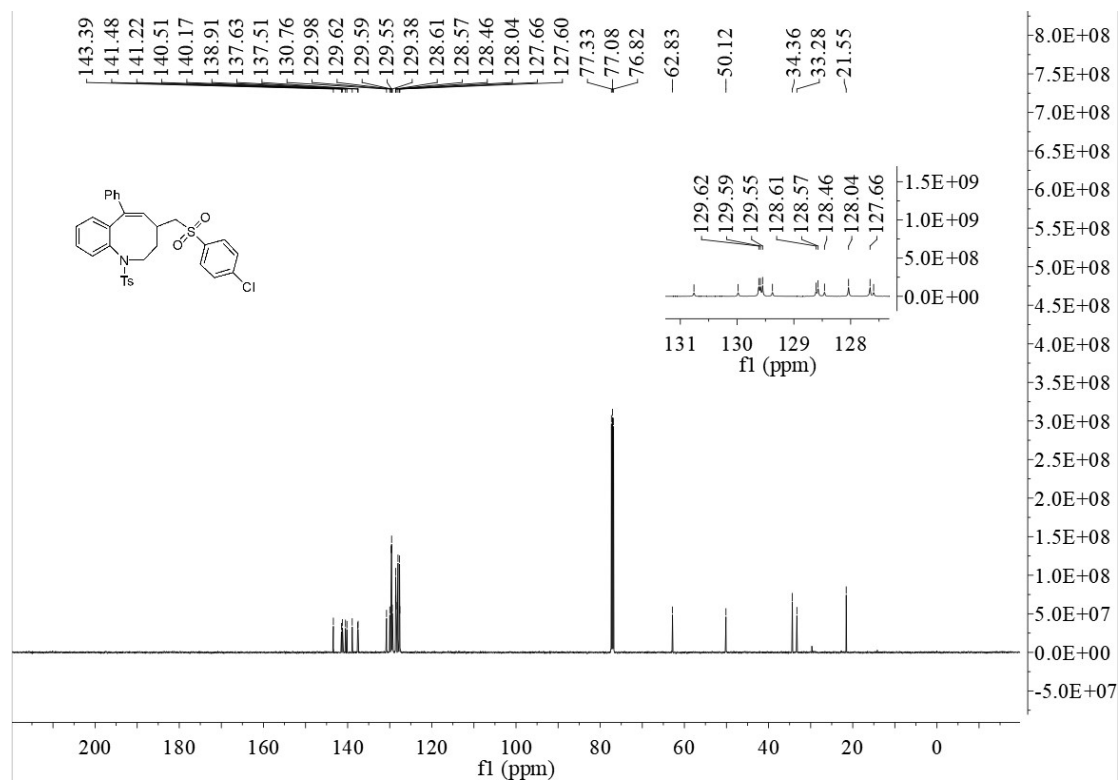

### Compound 3ad

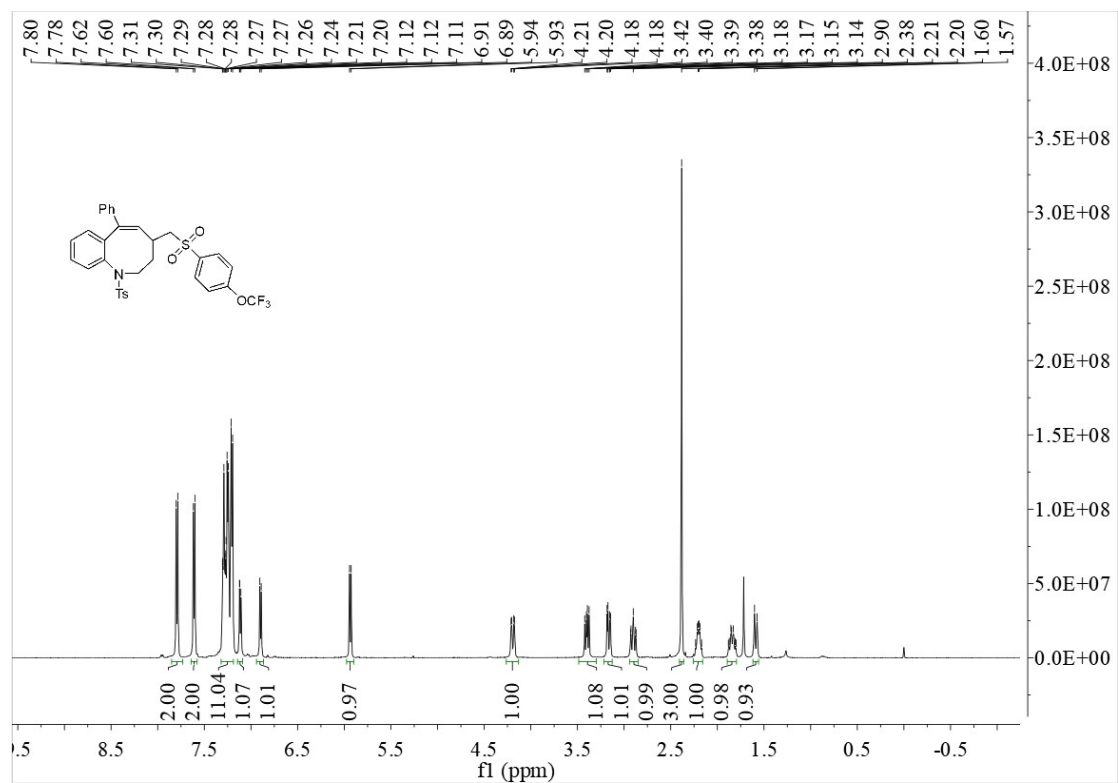

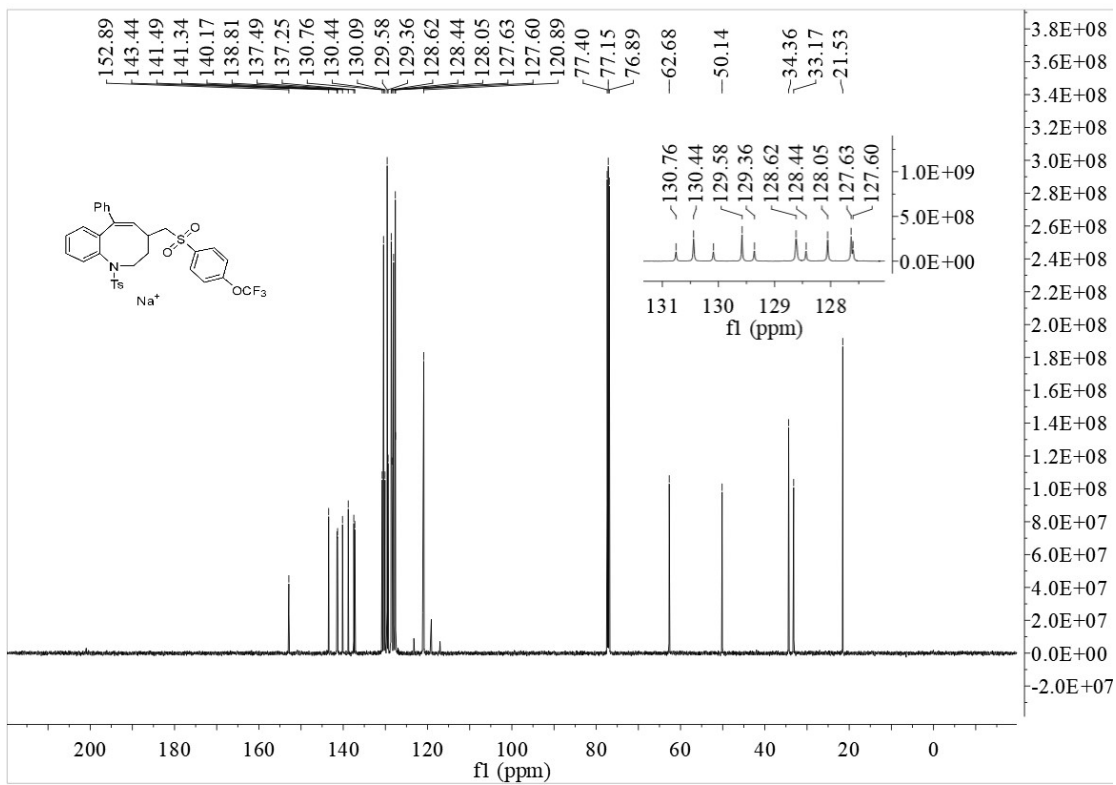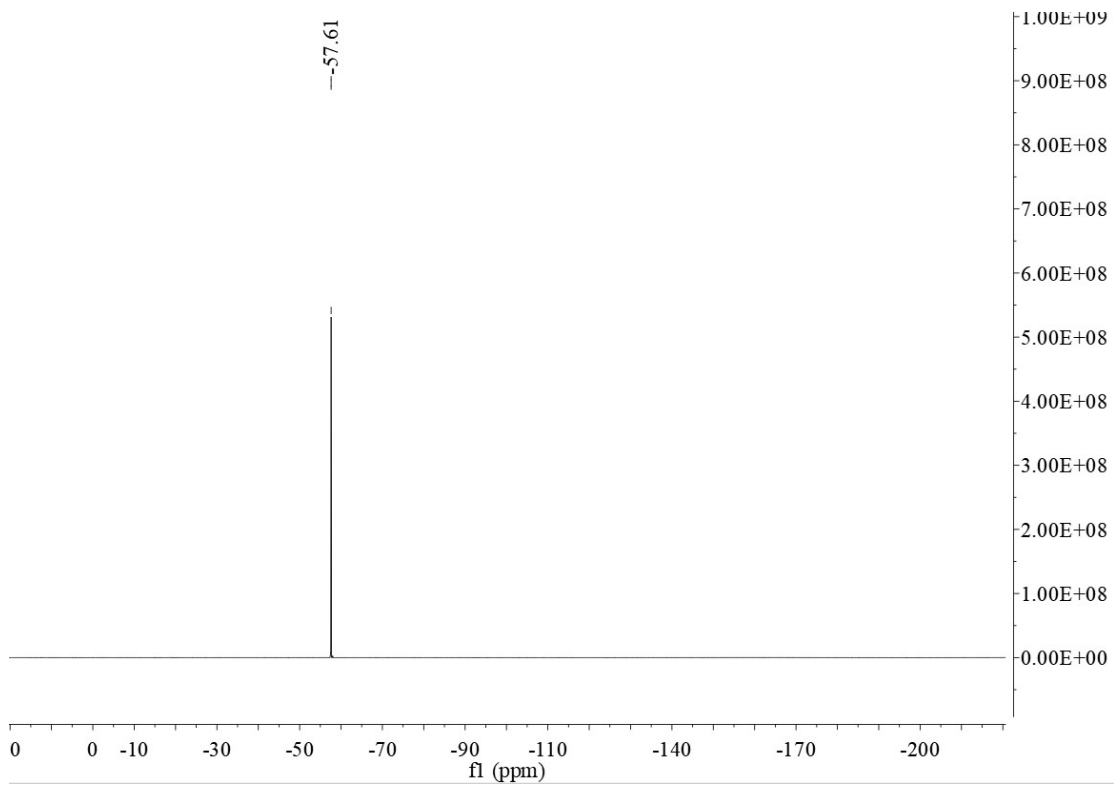

# Compound 3ae

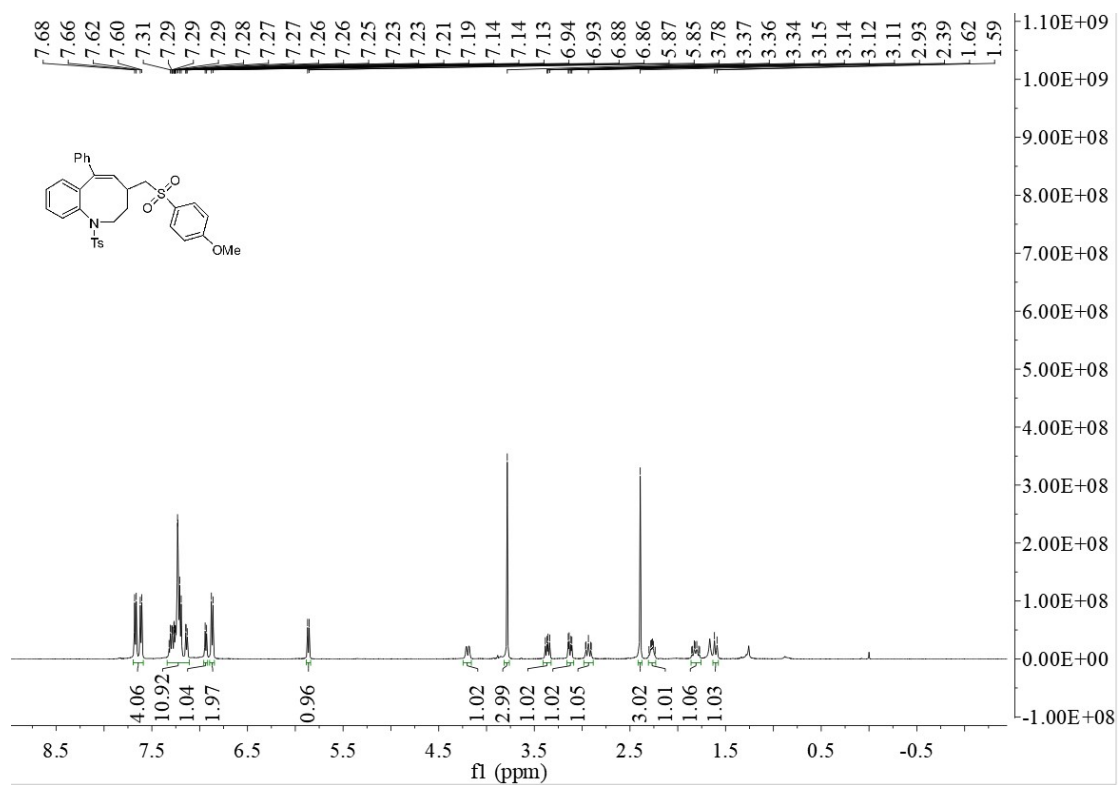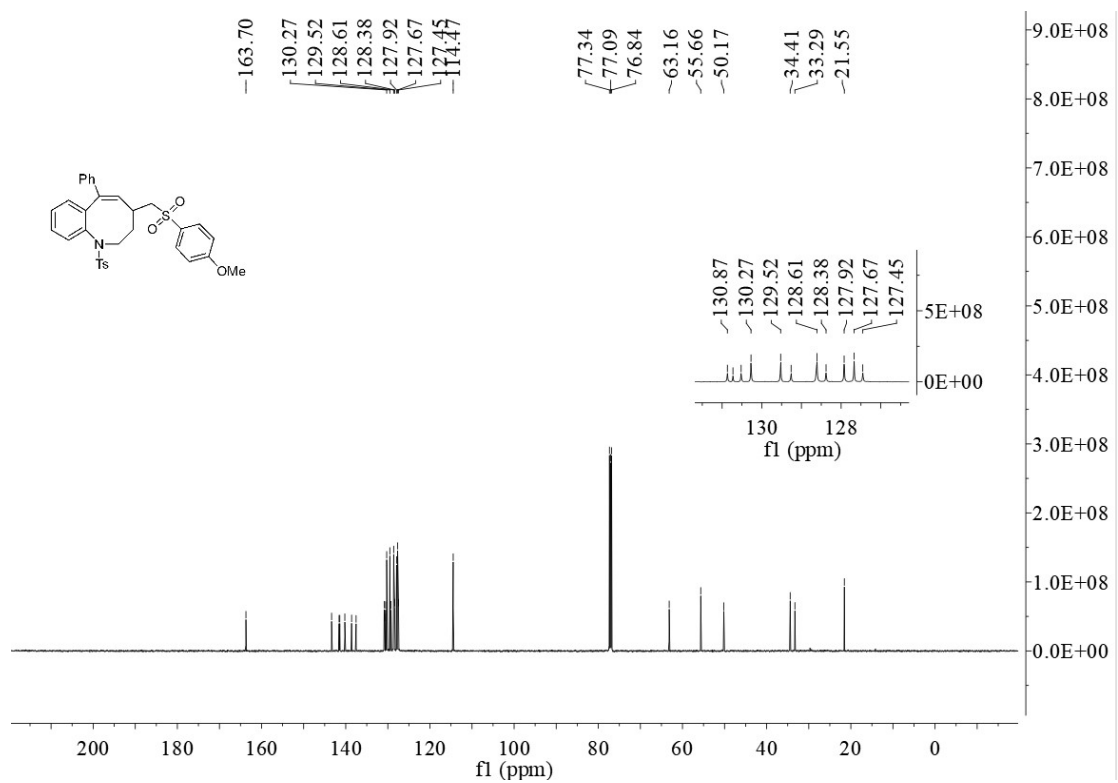

# Compound 3af

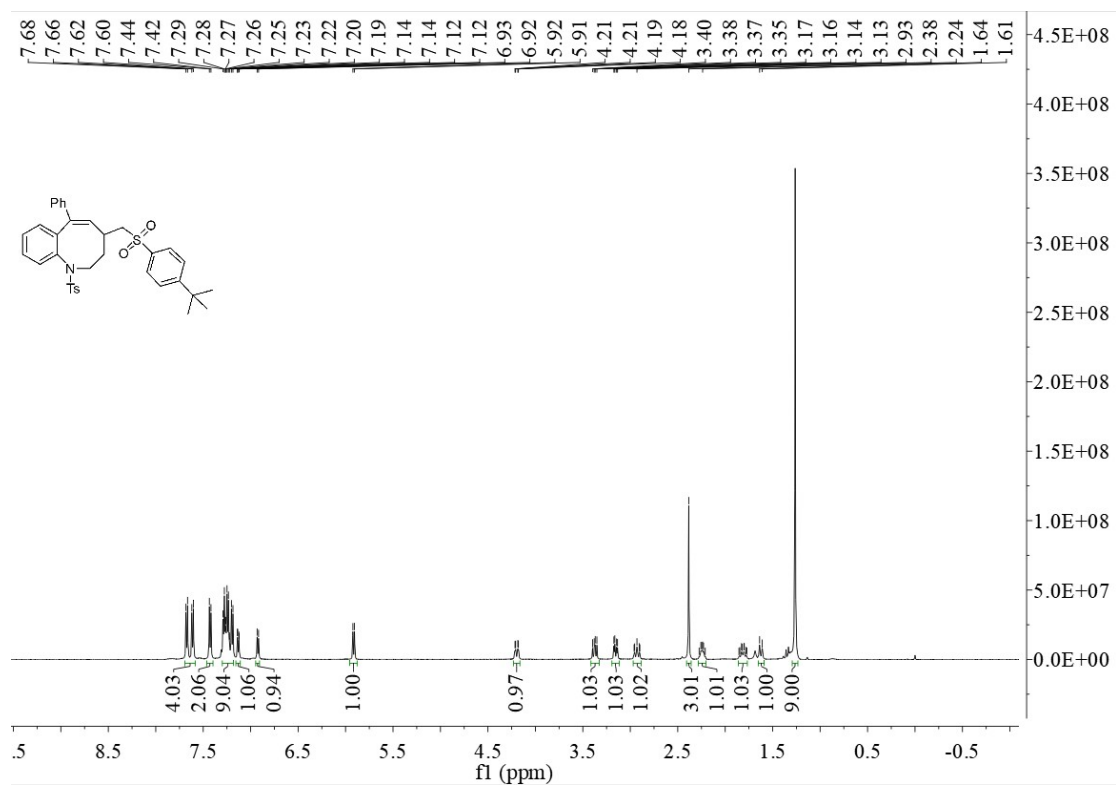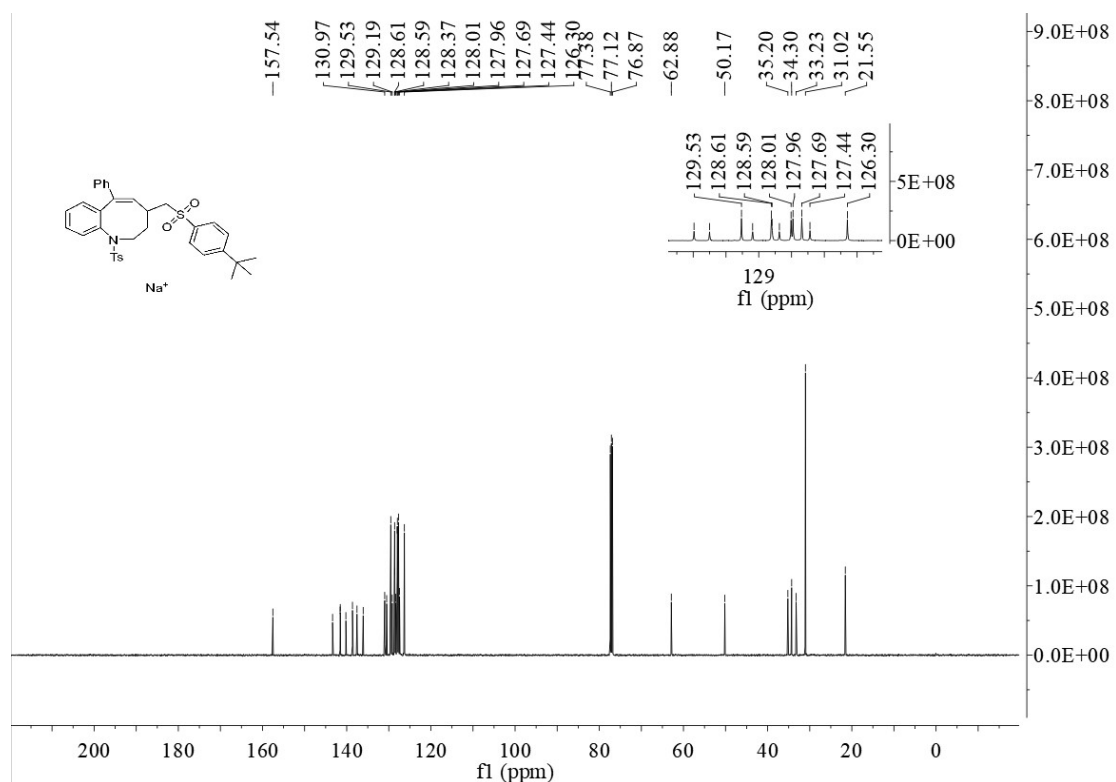



# Compound 3ag

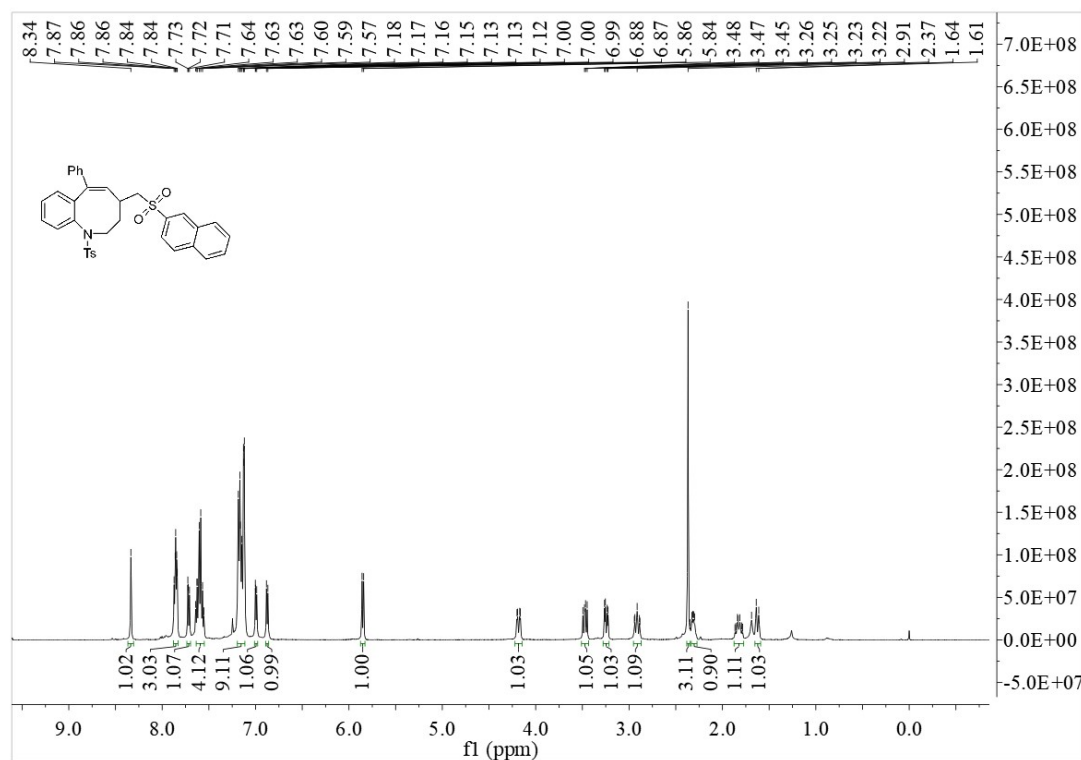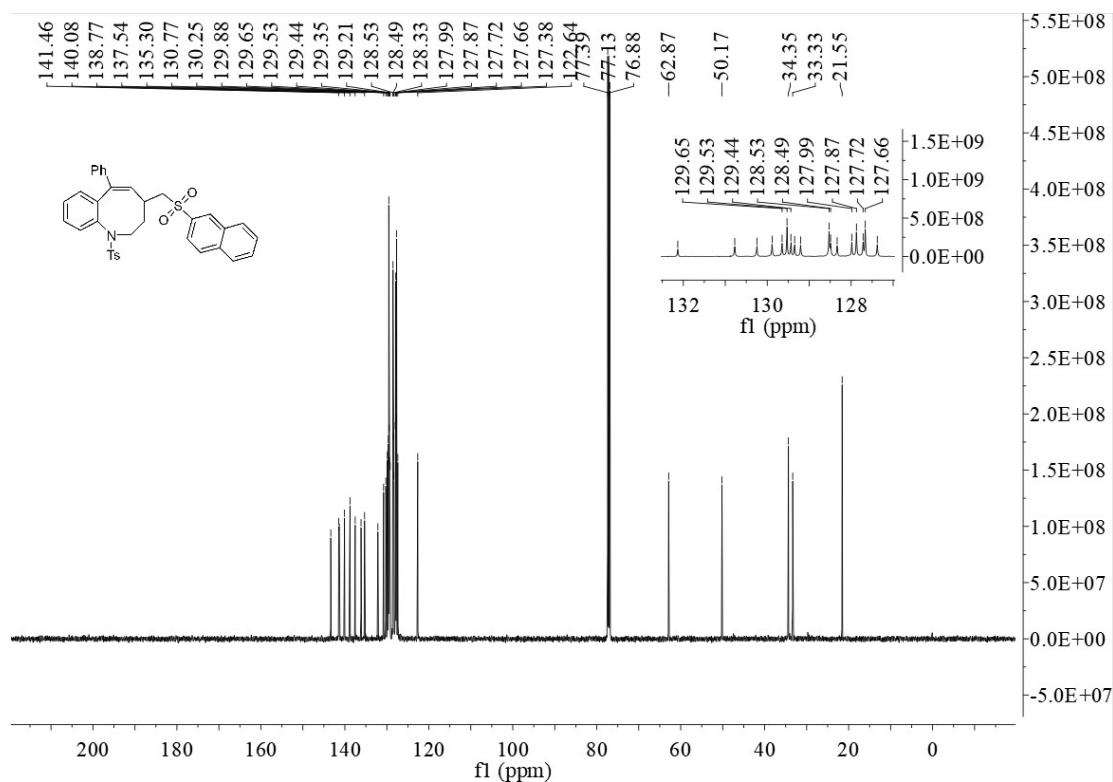

# Compound 3ah

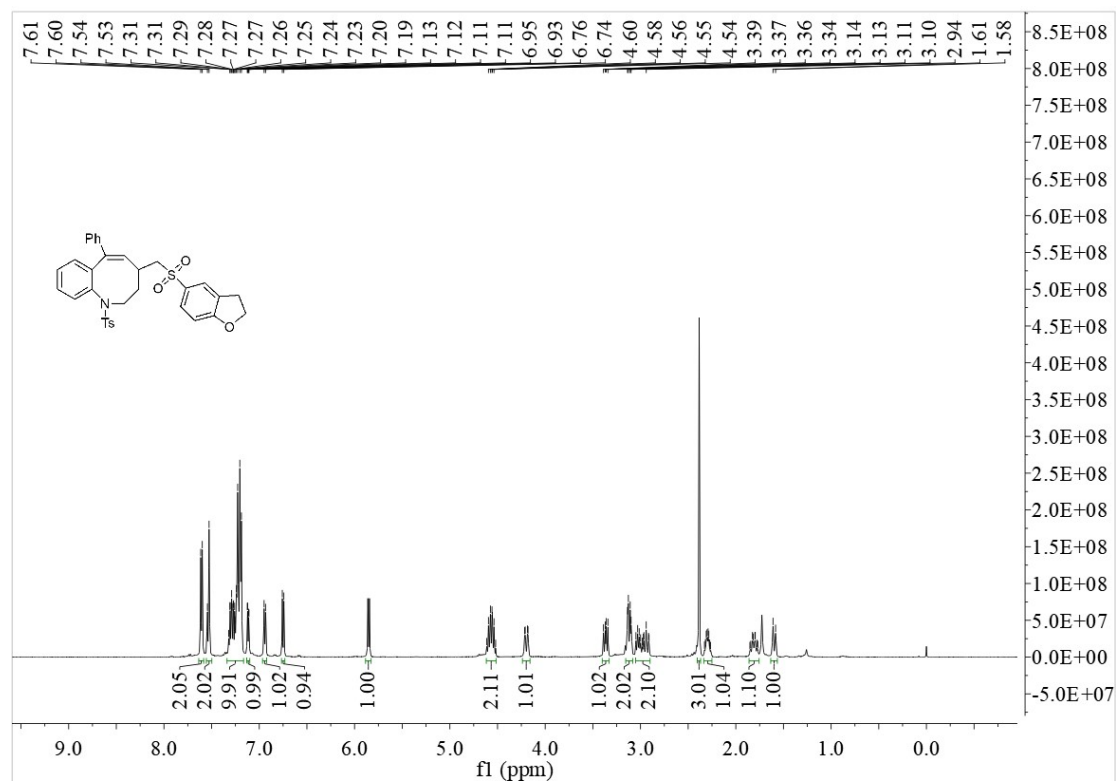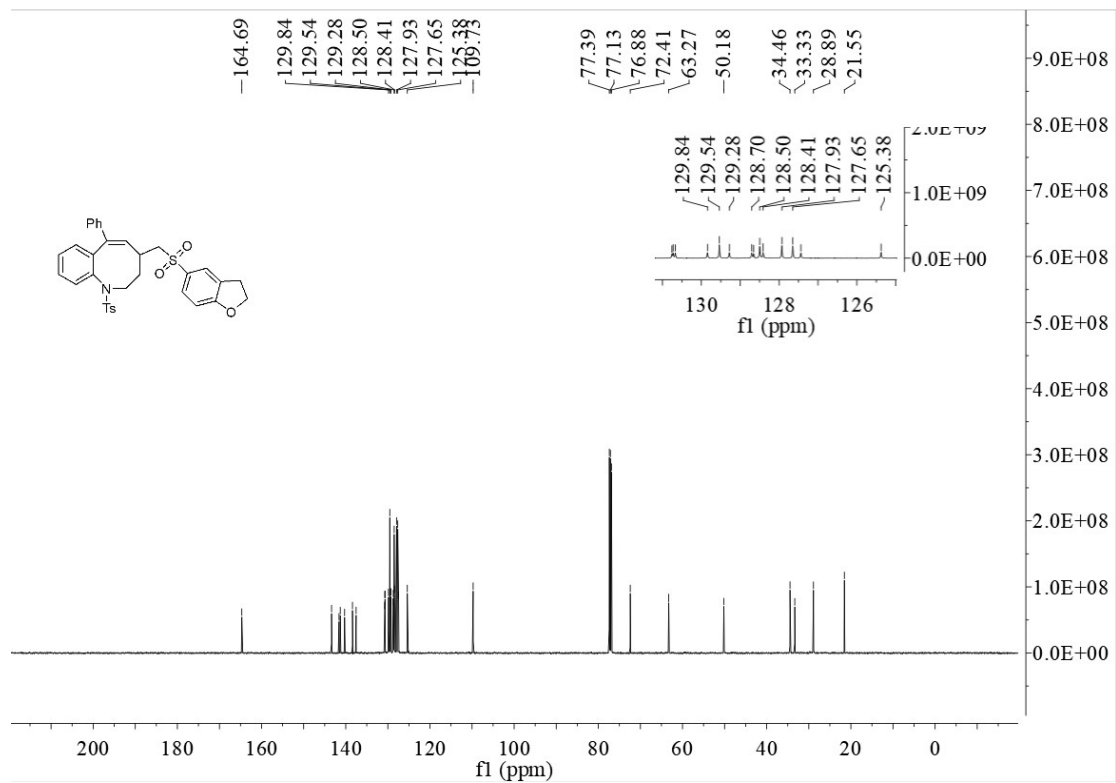

# Compound 3ai

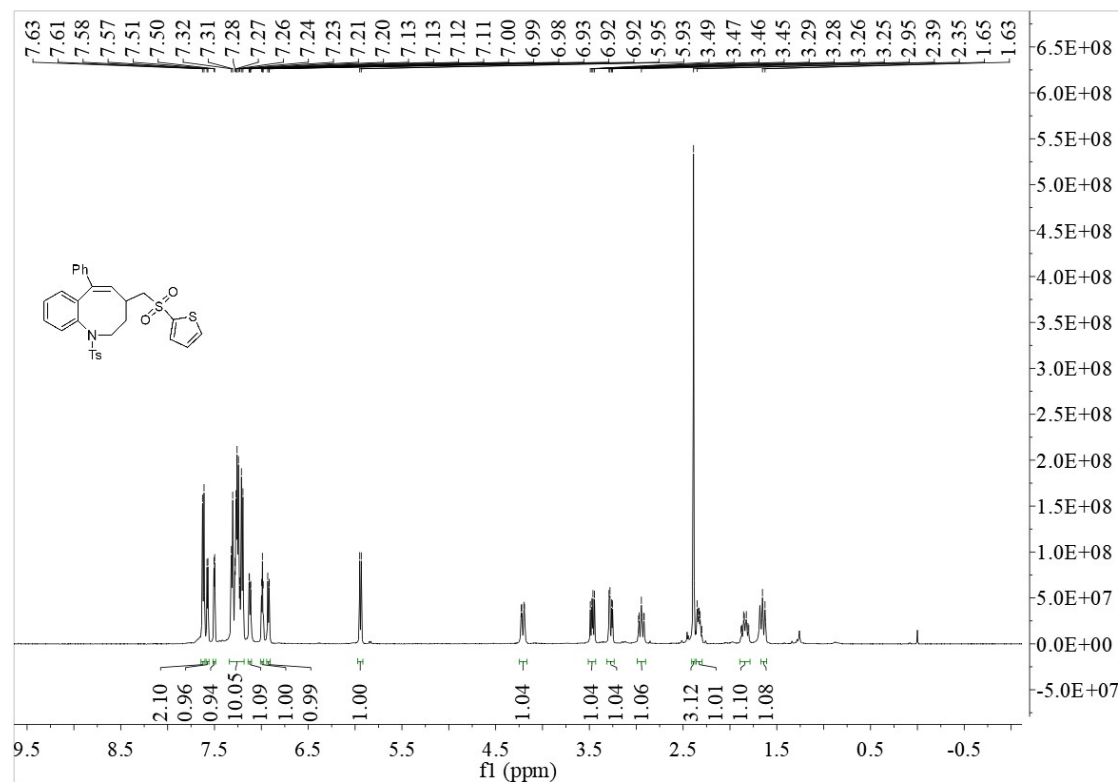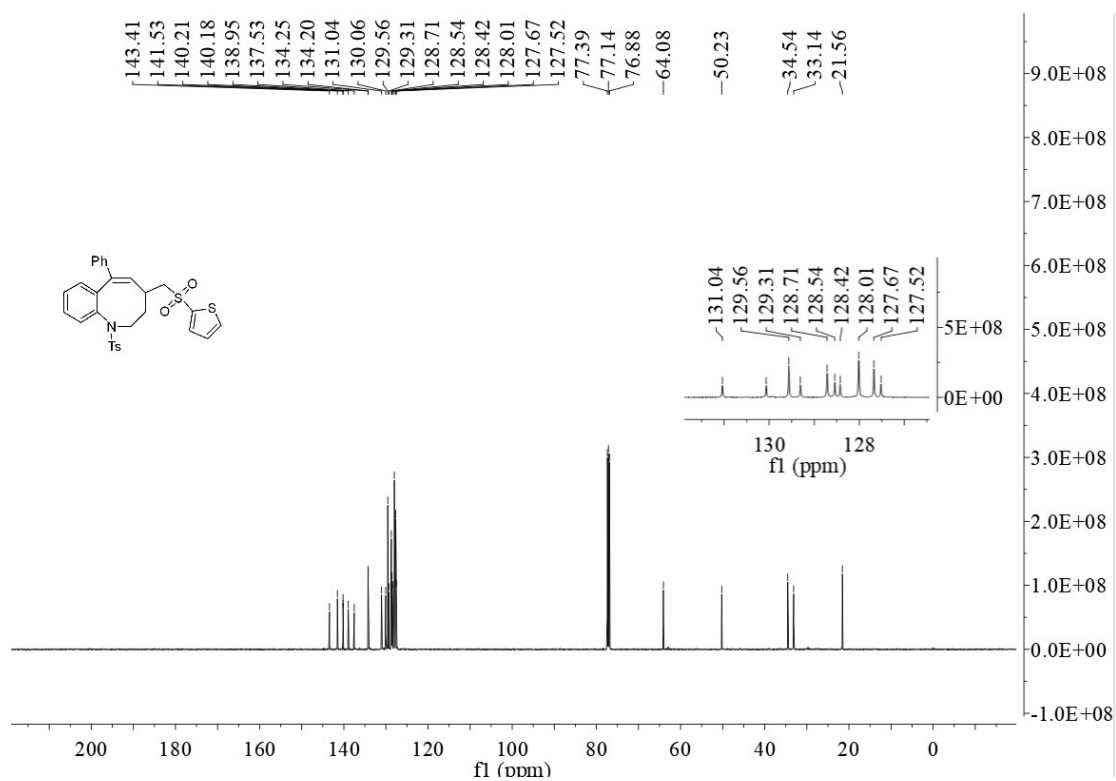

# Compound 3aj

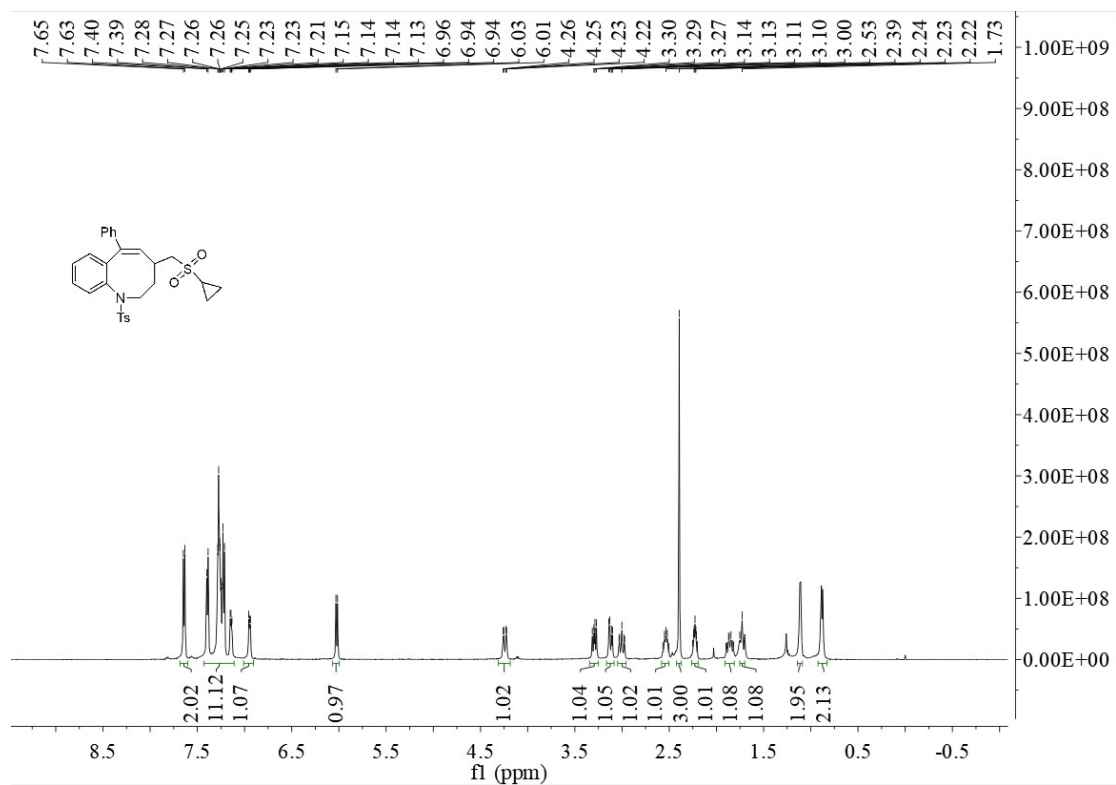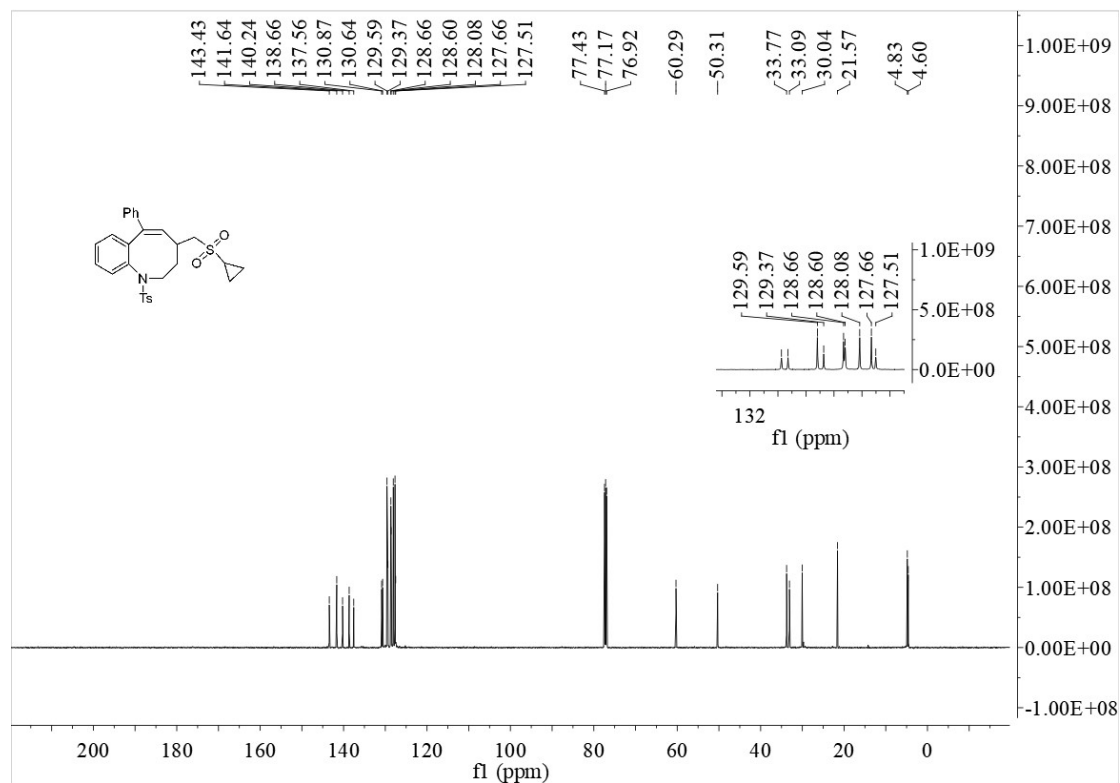

# Compound 3ak

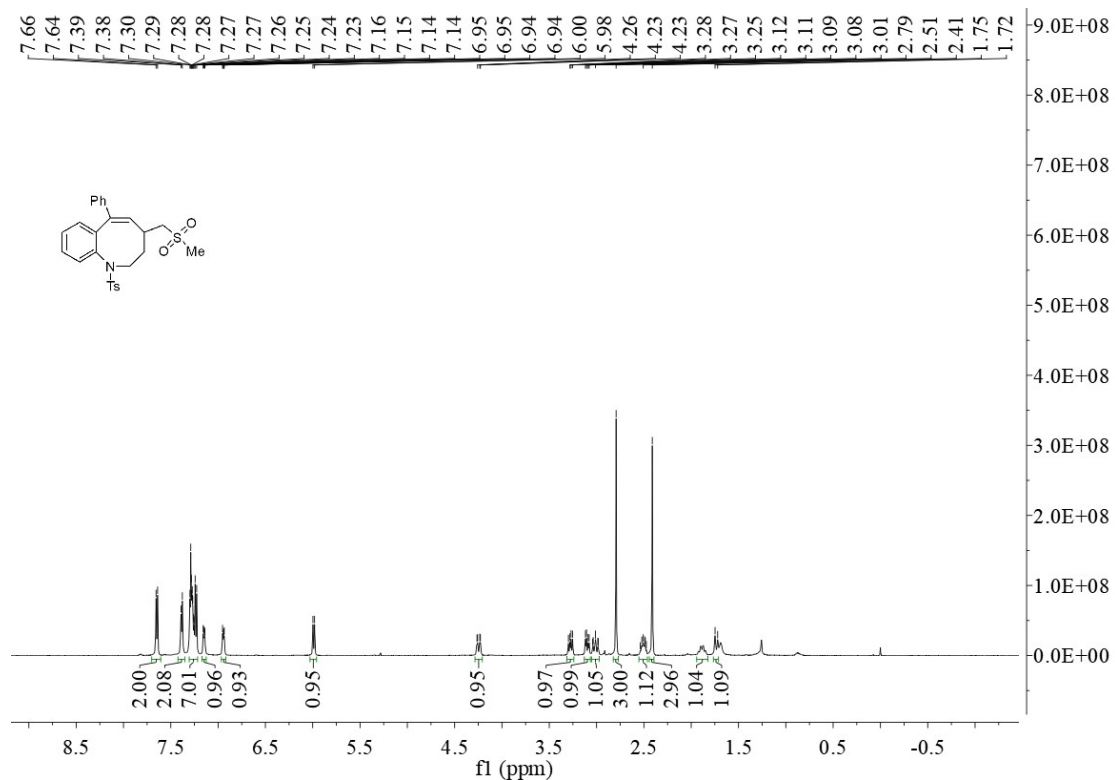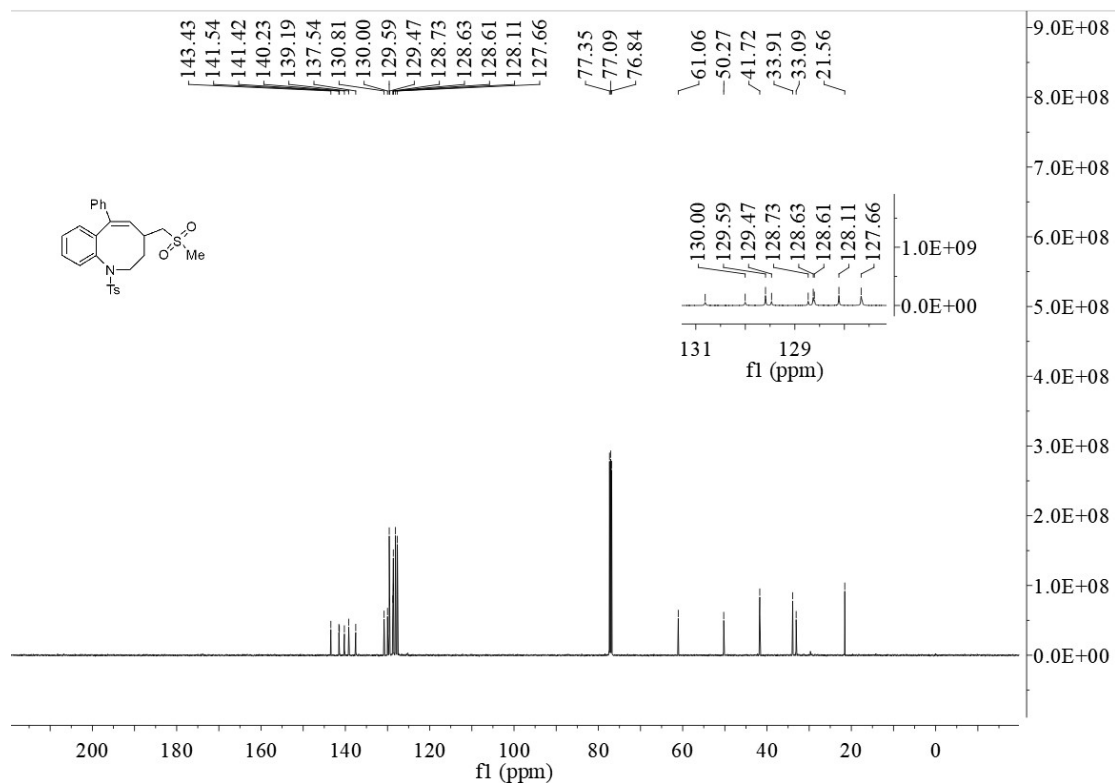

# Compound 4

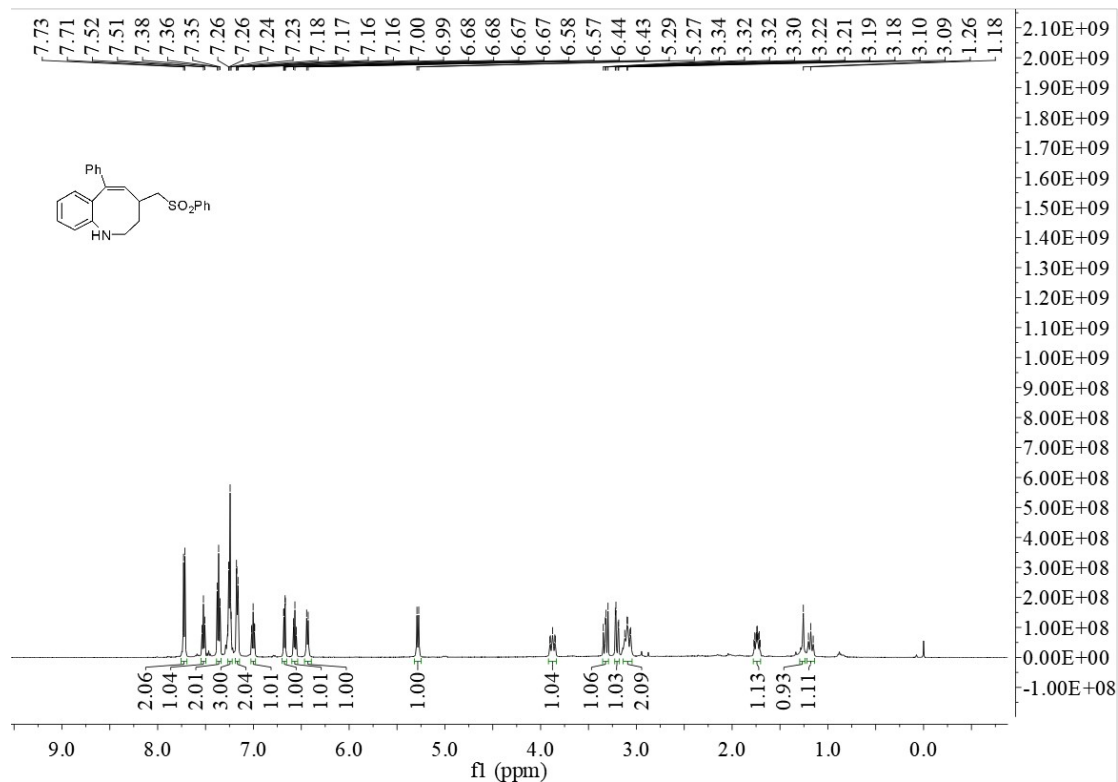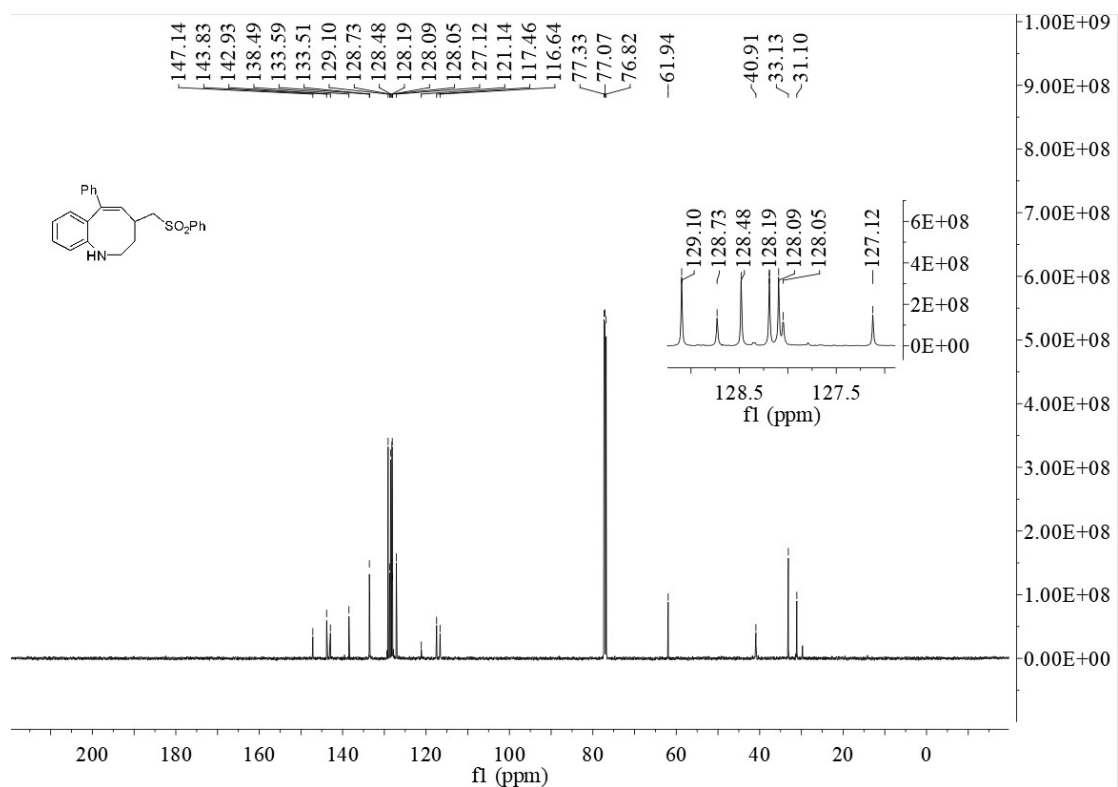

# Compound 5

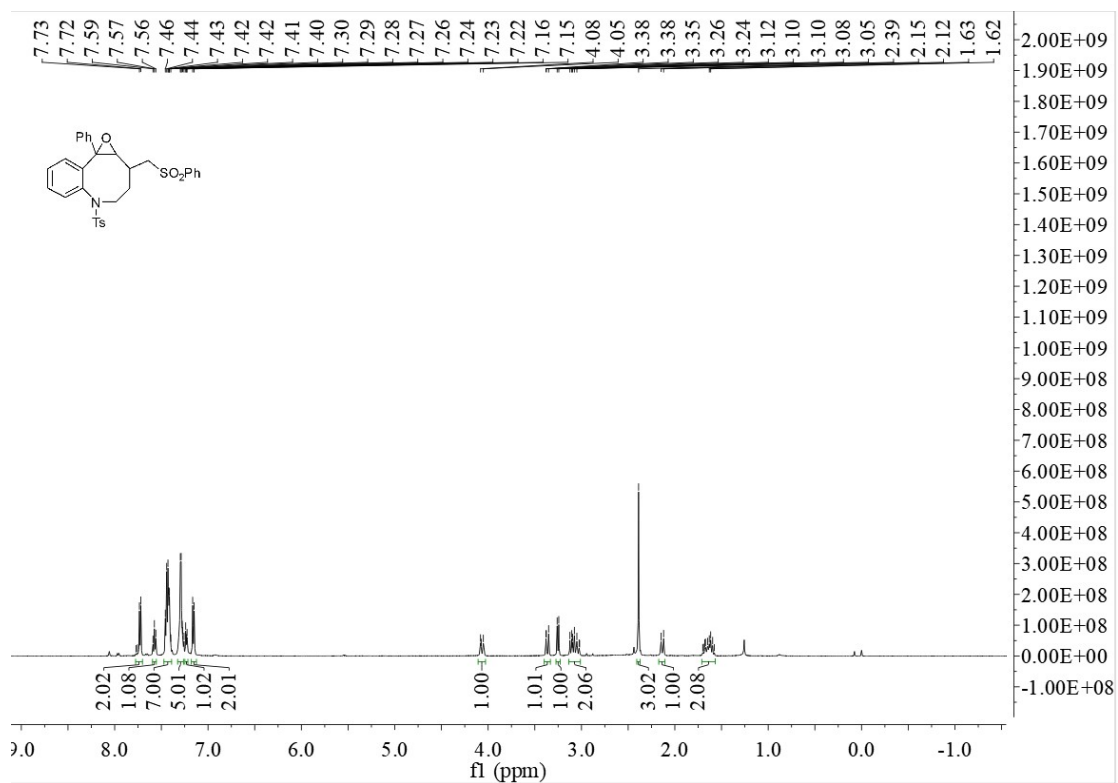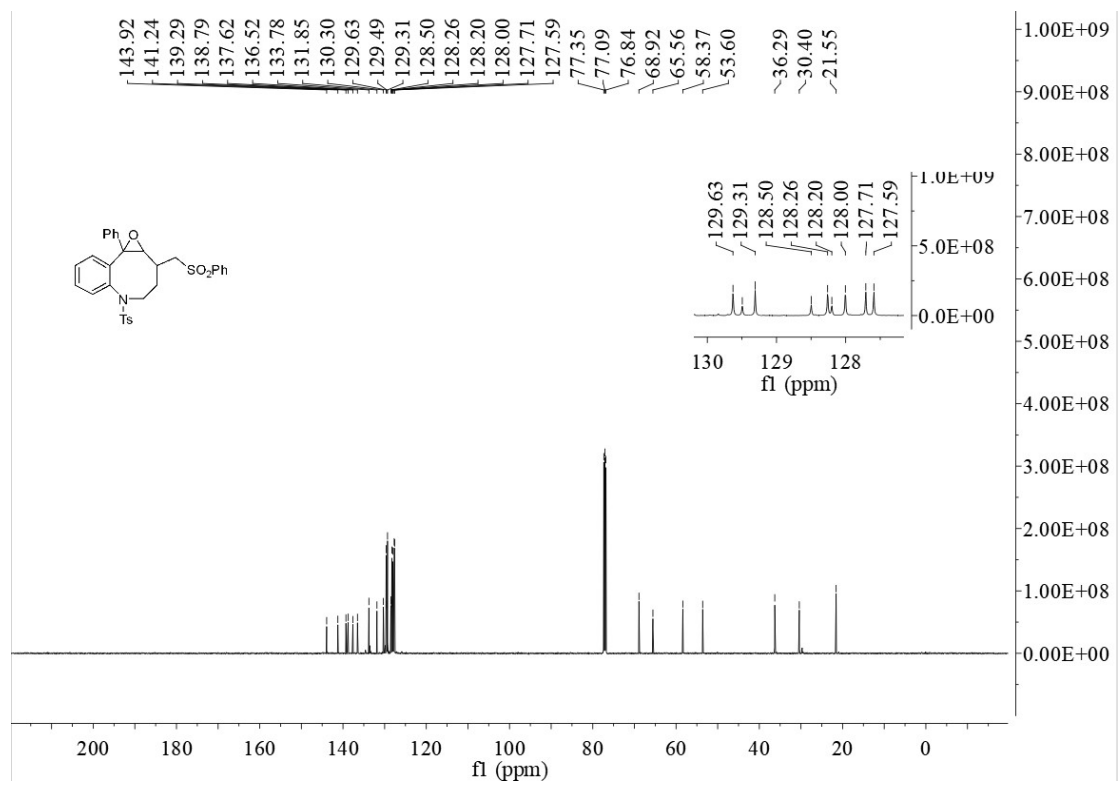

Supplement: d3qo00387f1.pdf [file d3qo00387f1.pdf]
